# Supplementary material for: MS-275, a class 1 histone deacetylase inhibitor augments glucagon-like peptide-1 receptor agonism to improve glycemic control and reduce obesity in diet-induced obese mice
Source: eLife. 2020 Dec 22;9:e52212. doi: 10.7554/eLife.52212 (PMC7755393; doi:10.7554/eLife.52212)
Supplement: Figure 1—source data 1. — Source Data 1B: MS-275 dose-response for induction of GLP-1R-mediated cAMP generation in cultured pancreatic beta cells. Source Data 1C: Impact of GLP-1R antagonist Jant4 on liraglutide-mediated cAMP generation in control and MS-275-treated cultured pancreatic beta cells. Source Data 1D: MS-275-mediated potentiation of GIPR agonist IUB68-mediated cAMP generation in BRIN-BD11 pancreatic beta cells. Source Data 1F: Time course of GLP-1R-mediated cAMP generation in control and MS-275-treated pancreatic beta cells. Source Data 1G: Impact of Bafilomycin A1 on MS-275-induced stimulation of GLP-1R-mediated cAMP generation. Source Data 1H: Effect of Rab5A S34N dominant-negative plasmid on the MS-275-mediated augmentation of GLP-1R signaling. [file elife-52212-fig1-data1.xlsx]

## Sheet: Fig1A,Fig1B
Source Data 1 Figure 1
Source Data Fig 1A
Test	RLU-1	B-gal1	RLU-2	B-gal2	RLU-1/B-gal1	RLU-2/B-gal2	Average	Fold 1	Fold2	Average Fold
PBS	1110	0.0967132	873	0.102561	11477.2	8511.99	9994.61	1.14834	0.851658	1
LIRA	11411	0.111738	6803	0.10985	102123	61929.7	82026.1	10.2178	6.1963	8.20703
MS-275	3718	0.100089	3631	0.0989483	37147	36695.9	36921.5	3.7167	3.67157	3.69413
Tric A	1821	0.098676	1916	0.0979558	18454.3	19559.8	19007.1	1.84643	1.95704	1.90173
SAHA	1375	0.102722	1290	0.0967646	13385.6	13331.3	13358.5	1.33928	1.33385	1.33657
AR42	1447	0.0970301	1436	0.0959542	14912.9	14965.5	14939.2	1.49209	1.49735	1.49472
Scriptaid	1550	0.0957677	1385	0.0954127	16185	14515.9	15350.4	1.61937	1.45237	1.53587
Valproic acid	658	0.0964274	443	0.100779	6823.79	4395.77	5609.78	0.682746	0.439814	0.56128
PBS (DMSO)	653	0.0953335	533	0.0973537	6849.64	5474.88	6162.26	0.685333	0.547783	0.616558
LIRA	9314	0.0990948	9718	0.0981067	93990.8	99055.5	96523.1	9.40415	9.91088	9.65751
MS-275+ Lira	33607	0.0991906	29208	0.0990046	338812	295017	316914	33.8995	29.5176	31.7085
Tric A+ Lira	15110	0.102415	15110	0.0972134	147536	155431	151484	14.7616	15.5515	15.1566
SAHA+ Lira	16919	0.0965236	17855	0.0983898	175284	181472	178378	17.5378	18.157	17.8474
AR42+ Lira	23043	0.102412	23318	0.0952478	225002	244814	234908	22.5123	24.4946	23.5034
Scriptaid+ Lira	16235	0.100969	13590	0.0993072	160791	136848	148820	16.0878	13.6922	14.89
Valproic acid+ Lira	6993	0.0966394	6665	0.0985174	72361.8	67653	70007.4	7.24008	6.76895	7.00451
Figure legend Source Data 1A: Primary screening data of small molecules for stimulation of GLP-1R mediated cAMP generation.
Source Data Fig1B : MS-275 Dose response
Experiment 1
Name	RLU-1	B-gal1	RLU-2	B-gal2	RLU-1/B-gal1	RLU-2/B-gal2	Average	Fold 1	Fold2	Av Fold	StDev	%CV
Basal (DMSO(0.01%))	101	0.0967473	94	0.0968298	1043.96	970.775	1007.37	1.03632	0.963677	1	0.0513689	5.13689
MS-275 5µM	1217	0.0965287	1201	0.0993901	12607.6	12083.7	12345.7	12.5155	11.9953	12.2554	0.367779	3.00096
MS-275 50µM+Liraglutide 100nM	21664	0.0993007	20681	0.0963484	218166	214648	216407	216.57	213.079	214.824	2.46903	1.14932
MS-275 10µM+Liraglutide 100nM	19218	0.0980608	17269	0.0955824	195981	180671	188326	194.547	179.35	186.949	10.7461	5.74815
MS-275 5µM+Liraglutide 100nM	16131	0.0948368	14439	0.0977843	170092	147662	158877	168.848	146.582	157.715	15.7448	9.98303
MS-275 1µM+Liraglutide 100nM	4416	0.0966276	4346	0.096323	45701.2	45119	45410.1	45.3671	44.7891	45.0781	0.408681	0.906607
MS-275 0.1µM+Liraglutide 100nM	2766	0.103586	2592	0.0956747	26702.4	27091.8	26897.1	26.5072	26.8937	26.7004	0.273317	1.02364
MS-275 0.01µM+Liraglutide 100nM	3388	0.0968643	3543	0.0984112	34976.8	36002	35489.4	34.721	35.7388	35.2299	0.719653	2.04273
MS-275 0.001µM+Liraglutide 100nM	3405	0.110222	3696	0.0967445	30892.3	38203.7	34548	30.6664	37.9243	34.2954	5.13216	14.9646
MS-275 0.0001µM+Liraglutide 100nM	3128	0.107522	3578	0.0965786	29091.8	37047.5	33069.7	28.8791	36.7766	32.8279	5.58442	17.0112
Liraglutide 100nM	3978	0.0979298	4012	0.0985086	40620.9	40727.4	40674.2	40.3239	40.4296	40.3767	0.0747348	0.185094
Experiment2
Name	RLU-1	B-gal1	RLU-2	B-gal2	RLU-1/B-gal1	RLU-2/B-gal2	Average	Fold 1	Fold2	Av Fold	StDev	%CV
Basal (DMSO(0.01%))	101	0.100476	100	0.0987245	1005.21	1012.92	1009.07	0.99618	1.00382	1	0.00540259	0.540259
MS-275 5µM	1278	0.0953636	1193	0.10045	13401.3	11876.6	12639	13.2809	11.7699	12.5254	1.0685	8.53065
MS-275 50µM+Liraglutide 100nM	20876	0.0951186	20549	0.0952009	219473	215849	217661	217.502	213.91	215.706	2.53983	1.17745
MS-275 10µM+Liraglutide 100nM	16498	0.0986589	16009	0.110456	167223	144936	156079	165.72	143.634	154.677	15.6175	10.0969
MS-275 5µM+Liraglutide 100nM	12740	0.0958077	12850	0.0952705	132975	134879	133927	131.78	133.667	132.724	1.33458	1.00553
MS-275 1µM+Liraglutide 100nM	4123	0.0972963	4212	0.0951774	42375.7	44254.2	43315	41.995	43.8567	42.9258	1.31639	3.06665
MS-275 0.1µM+Liraglutide 100nM	2589	0.105625	2669	0.0960712	24511.2	27781.5	26146.3	24.291	27.5319	25.9114	2.29169	8.84432
MS-275 0.01µM+Liraglutide 100nM	3498	0.0989587	3549	0.0951241	35348.1	37309.2	36328.6	35.0305	36.974	36.0023	1.37425	3.81712
MS-275 0.001µM+Liraglutide 100nM	3838	0.0955417	3846	0.107494	40170.9	35778.8	37974.9	39.81	35.4574	37.6337	3.07779	8.17828
MS-275 0.0001µM+Liraglutide 100nM	3960	0.0951575	3676	0.0963257	41615.2	38162.2	39888.7	41.2414	37.8194	39.5304	2.41973	6.12119
Liraglutide 100nM	4390	0.0982719	4311	0.102667	44672	41990.3	43331.1	44.2707	41.6131	42.9419	1.87921	4.37617
Experiment3
Name	RLU-1	B-gal1	RLU-2	B-gal2	RLU-1/B-gal1	RLU-2/B-gal2	Average	Fold 1	Fold2	Av Fold	StDev	%CV
Basal (DMSO(0.01%))	98	0.111221	99	0.11196	881.127	884.246	882.687	0.998233	1.00177	1	0.00249839	0.249839
MS-275 5µM	1301	0.109022	1292	0.101456	11933.4	12734.6	12334	13.5194	14.4271	13.9732	0.641897	4.59376
MS-275 50µM+Liraglutide 100nM	19313	0.0958358	19931	0.099319	201522	200677	201099	228.305	227.348	227.826	0.677006	0.297159
MS-275 10µM+Liraglutide 100nM	17476	0.103963	15798	0.0993837	168098	158960	163529	190.439	180.086	185.263	7.32069	3.95152
MS-275 5µM+Liraglutide 100nM	13356	0.108714	12954	0.0951412	122854	136155	129505	139.182	154.251	146.717	10.6556	7.26269
MS-275 1µM+Liraglutide 100nM	4749	0.097093	3940	0.0983219	48911.9	40072.4	44492.2	55.4125	45.3983	50.4054	7.08115	14.0484
MS-275 0.1µM+Liraglutide 100nM	3343	0.0988211	2943	0.0936464	33828.8	31426.7	32627.8	38.3248	35.6035	36.9642	1.92429	5.20582
MS-275 0.01µM+Liraglutide 100nM	3350	0.114101	3601	0.0921299	29359.9	39086.1	34223	33.262	44.2809	38.7714	7.79151	20.096
MS-275 0.001µM+Liraglutide 100nM	3451	0.11934	3459	0.0987937	28917.5	35012.3	31964.9	32.7608	39.6657	36.2132	4.88249	13.4826
MS-275 0.0001µM+Liraglutide 100nM	3349	0.0955924	3498	0.0973127	35034.2	35946	35490.1	39.6904	40.7234	40.2069	0.730432	1.81668
Lira 100nM	4113	0.097857	4343	0.0975353	42030.7	44527.5	43279.1	47.6168	50.4454	49.0311	2.00014	4.07932
Summary Statistics	Exp1	Exp2	Exp3
	Av Fold	Av Fold	Av Fold	Mean	SEM		One-way analysis of variance
Basal (DMSO(0.01%))	1	1	1	1			P value	< 0.0001
MS-275 5µM	12.2554	12.5254	13.9732	12.92	0.5333		P value summary	***
MS-275 50µM+Liraglutide 100nM	214.824	215.706	227.826	219.5	4.195		Are means signif. different? (P < 0.05)	Yes
MS-275 10µM+Liraglutide 100nM	186.949	154.677	185.263	175.6	10.49		Number of groups	11
MS-275 5µM+Liraglutide 100nM	157.715	132.724	146.717	145.7	7.232		F	277
MS-275 1µM+Liraglutide 100nM	45.0781	42.9258	50.4054	46.14	2.223		R squared	0.9921
MS-275 0.1µM+Liraglutide 100nM	26.7004	25.9114	36.9642	29.86	3.56
MS-275 0.01µM+Liraglutide 100nM	35.2299	36.0023	38.7714	36.67	1.075		ANOVA Table	SS	df	MS
MS-275 0.001µM+Liraglutide 100nM	34.2954	37.6337	36.2132	36.05	0.9673		Treatment (between columns)	160200	10	16020
MS-275 0.0001µM+Liraglutide 100nM	32.8279	39.5304	40.2069	37.52	2.355		Residual (within columns)	1272	22	57.82
Liraglutide 100nM	40.3767	42.9419	49.0311	44.12	2.566		Total	161500	32
Figure legend Source Data Fig1B:MS-275 dose-response for induction of GLP-1R mediated cAMP generation in cultured pancreatic beta cells.
							Tukey's Multiple Comparison Test	Mean Diff.	q	Significant? P < 0.05?	Summary	95% CI of diff
							Basal vs MS-275 5µM	-11.92	2.715	No	ns	-34.13 to 10.30
							Basal vs MS-275 50µM+Lira 100nM	-218.5	49.76	Yes	***	-240.7 to -196.2
							Basal vs MS-275 10µM+Lira 100nM	-174.6	39.78	Yes	***	-196.8 to -152.4
							Basal vs MS-275 5µM+Liraglutide 100nM	-144.7	32.96	Yes	***	-166.9 to -122.5
							Basal vs MS-275 1µM+Liraglutide 100nM	-45.14	10.28	Yes	***	-67.35 to -22.92
							Basal vs MS-275 0.1µM+Liraglutide 100nM	-28.86	6.574	Yes	**	-51.07 to -6.645
							Basal vs MS-275 0.01µM+Lira 100nM	-35.67	8.125	Yes	***	-57.88 to -13.45
							Basal vs MS-275 0.001µM+Lira 100nM	-35.05	7.983	Yes	***	-57.26 to -12.83
							Basal vs MS-275 0.0001µM+Lira 100nM	-36.52	8.319	Yes	***	-58.74 to -14.31
							Basal vs Liraglutide 100nM	-43.12	9.821	Yes	***	-65.33 to -20.90
							MS-275 5µM vs MS-275 50µM+Lira 100nM	-206.5	47.05	Yes	***	-228.7 to -184.3
							MS-275 5µM vs MS-275 10µM+Lira 100nM	-162.7	37.06	Yes	***	-184.9 to -140.5
							MS-275 5µM vs MS-275 5µM+Liraglutide 100nM	-132.8	30.25	Yes	***	-155.0 to -110.6
							MS-275 5µM vs MS-275 1µM+Liraglutide 100nM	-33.22	7.567	Yes	***	-55.43 to -11.00
							MS-275 5µM vs MS-275 0.1µM+Liraglutide 100nM	-16.94	3.859	No	ns	-39.15 to 5.273
							MS-275 5µM vs MS-275 0.01µM+Lira 100nM	-23.75	5.41	Yes	*	-45.96 to -1.536
							MS-275 5µM vs MS-275 0.001µM+Lira 100nM	-23.13	5.269	Yes	*	-45.34 to -0.9154
							MS-275 5µM vs MS-275 0.0001µM+Lira 100nM	-24.6	5.604	Yes	*	-46.82 to -2.390
							MS-275 5µM vs Liraglutide 100nM	-31.2	7.107	Yes	**	-53.41 to -8.985
							MS-275 50µM+Lira 100nM vs MS-275 10µM+Lira 100nM	43.82	9.982	Yes	***	21.61 to 66.04
							MS-275 50µM+Lira 100nM vs MS-275 5µM+Liraglutide 100nM	73.73	16.8	Yes	***	51.52 to 95.95
							MS-275 50µM+Lira 100nM vs MS-275 1µM+Liraglutide 100nM	173.3	39.48	Yes	***	151.1 to 195.5
							MS-275 50µM+Lira 100nM vs MS-275 0.1µM+Liraglutide 100nM	189.6	43.19	Yes	***	167.4 to 211.8
							MS-275 50µM+Lira 100nM vs MS-275 0.01µM+Lira 100nM	182.8	41.64	Yes	***	160.6 to 205.0
							MS-275 50µM+Lira 100nM vs MS-275 0.001µM+Lira 100nM	183.4	41.78	Yes	***	161.2 to 205.6
							MS-275 50µM+Lira 100nM vs MS-275 0.0001µM+Lira 100nM	181.9	41.44	Yes	***	159.7 to 204.1
							MS-275 50µM+Lira 100nM vs Liraglutide 100nM	175.3	39.94	Yes	***	153.1 to 197.5
							MS-275 10µM+Lira 100nM vs MS-275 5µM+Liraglutide 100nM	29.91	6.813	Yes	**	7.697 to 52.12
							MS-275 10µM+Lira 100nM vs MS-275 1µM+Liraglutide 100nM	129.5	29.5	Yes	***	107.3 to 151.7
							MS-275 10µM+Lira 100nM vs MS-275 0.1µM+Liraglutide 100nM	145.8	33.2	Yes	***	123.6 to 168.0
							MS-275 10µM+Lira 100nM vs MS-275 0.01µM+Lira 100nM	139	31.65	Yes	***	116.7 to 161.2
							MS-275 10µM+Lira 100nM vs MS-275 0.001µM+Lira 100nM	139.6	31.79	Yes	***	117.4 to 161.8
							MS-275 10µM+Lira 100nM vs MS-275 0.0001µM+Lira 100nM	138.1	31.46	Yes	***	115.9 to 160.3
							MS-275 10µM+Lira 100nM vs Liraglutide 100nM	131.5	29.96	Yes	***	109.3 to 153.7
							MS-275 5µM+Liraglutide 100nM vs MS-275 1µM+Liraglutide 100nM	99.58	22.68	Yes	***	77.37 to 121.8
							MS-275 5µM+Liraglutide 100nM vs MS-275 0.1µM+Liraglutide 100nM	115.9	26.39	Yes	***	93.65 to 138.1
							MS-275 5µM+Liraglutide 100nM vs MS-275 0.01µM+Lira 100nM	109.1	24.84	Yes	***	86.84 to 131.3
							MS-275 5µM+Liraglutide 100nM vs MS-275 0.001µM+Lira 100nM	109.7	24.98	Yes	***	87.46 to 131.9
							MS-275 5µM+Liraglutide 100nM vs MS-275 0.0001µM+Lira 100nM	108.2	24.65	Yes	***	85.98 to 130.4
							MS-275 5µM+Liraglutide 100nM vs Liraglutide 100nM	101.6	23.14	Yes	***	79.39 to 123.8
							MS-275 1µM+Liraglutide 100nM vs MS-275 0.1µM+Liraglutide 100nM	16.28	3.708	No	ns	-5.936 to 38.49
							MS-275 1µM+Liraglutide 100nM vs MS-275 0.01µM+Lira 100nM	9.469	2.157	No	ns	-12.75 to 31.68
							MS-275 1µM+Liraglutide 100nM vs MS-275 0.001µM+Lira 100nM	10.09	2.298	No	ns	-12.13 to 32.30
							MS-275 1µM+Liraglutide 100nM vs MS-275 0.0001µM+Lira 100nM	8.615	1.962	No	ns	-13.60 to 30.83
							MS-275 1µM+Liraglutide 100nM vs Liraglutide 100nM	2.02	0.4601	No	ns	-20.19 to 24.23
							MS-275 0.1µM+Liraglutide 100nM vs MS-275 0.01µM+Lira 100nM	-6.809	1.551	No	ns	-29.02 to 15.40
							MS-275 0.1µM+Liraglutide 100nM vs MS-275 0.001µM+Lira 100nM	-6.189	1.41	No	ns	-28.40 to 16.03
							MS-275 0.1µM+Liraglutide 100nM vs MS-275 0.0001µM+Lira 100nM	-7.663	1.746	No	ns	-29.88 to 14.55
							MS-275 0.1µM+Liraglutide 100nM vs Liraglutide 100nM	-14.26	3.248	No	ns	-36.47 to 7.956
							MS-275 0.01µM+Lira 100nM vs MS-275 0.001µM+Lira 100nM	0.6204	0.1413	No	ns	-21.59 to 22.83
							MS-275 0.01µM+Lira 100nM vs MS-275 0.0001µM+Lira 100nM	-0.8538	0.1945	No	ns	-23.07 to 21.36
							MS-275 0.01µM+Lira 100nM vs Liraglutide 100nM	-7.449	1.697	No	ns	-29.66 to 14.77
							MS-275 0.001µM+Lira 100nM vs MS-275 0.0001µM+Lira 100nM	-1.474	0.3358	No	ns	-23.69 to 20.74
							MS-275 0.001µM+Lira 100nM vs Liraglutide 100nM	-8.069	1.838	No	ns	-30.28 to 14.14
							MS-275 0.0001µM+Lira 100nM vs Liraglutide 100nM	-6.595	1.502	No	ns	-28.81 to 15.62

## Sheet: Fig1C,Fig1D
Source Data Fig 1C	Impact of GLP-1R antagonist Jant4 in modulation of Liraglutide mediated cAMP generation in control and MS-275 treated cultured pancreatic beta cells.
	RLU1	BGal1	RLU2	BGal2	RLU1/BGal1	RLU2/BGal2	Average	Fold1	Fold2	Av Fold	StDev
Control
Basal	613	0.0957877	543	0.102915	6399.57	5276.2	5837.89	1.09621	0.903786	1	0.136067
Liraglutide (10nM)	4312	0.0999475	4188	0.103016	43142.6	40653.8	41898.2	7.39011	6.96379	7.17695	0.301456
Lira+Jant4(10μM)	359	0.100334	378	0.106969	3578.06	3533.72	3555.89	0.612903	0.605308	0.609105	0.00537072
Lira+Jant4(1μM)	468	0.0997503	473	0.0976036	4691.72	4846.13	4768.92	0.803667	0.830118	0.816892	0.0187037
Lira+Jant4(0.1μM)	590	0.0981303	602	0.0972811	6012.41	6188.25	6100.33	1.0299	1.06002	1.04496	0.0212983
Lira+Jant4(0.01μM)	940	0.100199	869	0.098034	9381.34	8864.28	9122.81	1.60697	1.5184	1.56269	0.0626285
Lira+Jant4(0.001μM)	1131	0.0988128	1223	0.0921048	11445.9	13278.3	12362.1	1.96062	2.27451	2.11757	0.221954
Jant4(0.0001μM)	1218	0.100102	1456	0.114164	12167.6	12753.6	12460.6	2.08424	2.18463	2.13444	0.0709847
Jant4(0.00001μM)	1388	0.098272	1498	0.103361	14124.1	14492.9	14308.5	2.41938	2.48255	2.45097	0.0446717
MS-275 treated	RLU1	BGal1	RLU2	BGal2	RLU1/BGal1	RLU2/BGal2	Average	Fold1	Fold2	Av Fold	StDev
Control Basal	613	0.0957877	543	0.102915	6399.57	5276.2	5837.89	1.09621	0.903786	1	0.136067
Liraglutide (10nM)	10134	0.0957877	9899	0.102915	105797	96186.2	100991	18.1224	16.4762	17.2993	1.16403
Lira+Jant4(10μM)	1060	0.0988137	1230	0.101523	10727.3	12115.5	11421.4	1.83752	2.07532	1.95642	0.168148
Lira+Jant4(1μM)	1136	0.0985952	1339	0.0900094	11521.9	14876.2	13199	1.97363	2.54822	2.26093	0.406294
Lira+Jant4(0.1μM)	1596	0.0929244	1741	0.0926333	17175.3	18794.5	17984.9	2.94203	3.21941	3.08072	0.196133
Lira+Jant4(0.01μM)	1893	0.0946375	2013	0.102463	20002.7	19646.2	19824.4	3.42635	3.36529	3.39582	0.0431737
Lira+Jant4(0.001μM)	2142	0.0933744	2293	0.0964043	22939.9	23785.2	23362.6	3.92949	4.07429	4.00189	0.10239
Lira+Jant4(0.0001μM)	2431	0.0998916	2331	0.100896	24336.4	23103	23719.7	4.1687	3.95742	4.06306	0.149395
Lira+Jant4(0.00001μM)	2631	0.100696	2551	0.101746	26128.3	25072.3	25600.3	4.47564	4.29476	4.3852	0.127902
Figure legend: Source Data 1C: Impact of GLP-1R antagonist Jant4 on Liraglutide mediated cAMP generation in control and MS-275 treated cultured pancreatic beta cells.
Source Data Fig 1D : Impact of MS-275 on GIPR agonist IUB 68 mediated cAMP generation
Experiment 1
	RLU	Bgal	RLU/Bgal	Fold increase
Basal (PBS)	12024	0.0922589	130329	240.016
MS-275(5μM)	73342	0.0944322	776663	1430.32
IUB-68 (1µM)	23290	0.0920831	252924	465.789
IUB-68 (1µM) +MS-275(5μM)	137160	0.0949156	1.44507e+06	2661.28
IUB-68 (0.1µM) +MS-275(5μM)	99037	0.0943714	1.04944e+06	1932.67
Experiment 2
	RLU	Bgal	RLU/Bgal	Fold increase
Basal (PBS)	11039	0.091686	120400	80.3739
MS-275(5μM)	80136	0.0963093	832069	555.454
IUB-68 (1µM)	26894	0.0965821	278457	185.886
IUB-68 (1µM) +MS-275(5μM)	136590	0.0948217	1.44049e+06	961.611
IUB-68 (0.1µM) +MS-275(5μM)	112460	0.0930115	1.2091e+06	807.141
Experiment 3
	RLU	Bgal	RLU/Bgal	Fold increase
Basal (PBS)	11659	0.0932758	124995	54.5115
MS-275(5μM)	85127	0.0961411	885438	386.148
IUB-68 (1µM)	27519	0.0957254	287478	125.372
IUB-68 (1µM) +MS-275(5μM)	130455	0.0937258	1.39188e+06	607.012
IUB-68 (0.1µM) +MS-275(5μM)	100851	0.103663	972874	424.28
Summary Statistics
	Experiment1	Experiment2	Experiment3				Table Analyzed	IUB68
	Fold	Fold	Fold	Mean	SEM
Basal (PBS)	1	1	1				One-way analysis of variance
MS-275(5μM)	5.95926	6.91087	7.0838	6.651	0.3496		P value	< 0.0001
IUB-68 (1µM)	1.94066	2.31277	2.29992	2.184	0.122		P value summary	***
IUB-68 (1µM) +MS-275(5μM)	11.0879	11.9642	11.1355	11.4	0.2845		Are means signif. different? (P < 0.05)	Yes
IUB-68 (0.1µM) +MS-275(5μM)	8.05224	10.0423	7.78331	8.626	0.7124		Number of groups	5
							F	130.9
Figure legend :Source Data Figure 1D: MS-275 mediated potentiation of GIPR agonist IUB68-mediated cAMP generation in BRIN-BD11 pancreatic beta cells.							R squared	0.9813
							ANOVA Table	SS	df	MS
							Treatment (between columns)	228	4	56.99
							Residual (within columns)	4.354	10	0.4354
							Total	232.3	14
							Tukey's Multiple Comparison Test	Mean Diff.	q	Significant? P < 0.05?	Summary	95% CI of diff
							Basal (PBS) vs MS-275 (5µM)	-5.651	14.83	Yes	***	-7.424 to -3.878
							Basal (PBS) vs IUB-68 (1µM)	-1.184	3.109	No	ns	-2.957 to 0.5885
							Basal (PBS) vs IUB-68(1µM)+MS-275(5M)	-10.4	27.29	Yes	***	-12.17 to -8.623
							Basal (PBS) vs IUB-68(0.1µM)+MS-275(5M)	-7.626	20.02	Yes	***	-9.399 to -5.853
							MS-275 (5µM) vs IUB-68 (1µM)	4.467	11.73	Yes	***	2.694 to 6.240
							MS-275 (5µM) vs IUB-68(1µM)+MS-275(5M)	-4.745	12.45	Yes	***	-6.517 to -2.972
							MS-275 (5µM) vs IUB-68(0.1µM)+MS-275(5M)	-1.975	5.184	Yes	*	-3.748 to -0.2017
							IUB-68 (1µM) vs IUB-68(1µM)+MS-275(5M)	-9.211	24.18	Yes	***	-10.98 to -7.438
							IUB-68 (1µM) vs IUB-68(0.1µM)+MS-275(5M)	-6.442	16.91	Yes	***	-8.214 to -4.669
							IUB-68(1µM)+MS-275(5M) vs IUB-68(0.1µM)+MS-275(5M)	2.77	7.271	Yes	**	0.9970 to 4.543

## Sheet: Fig 1F
Source Data Figure 1F
cAMP Standard Curve		OD	After Blank Correction		cAMP (pmol/ml)	OD	%B/B0
Conc	Blank	0.045	0		150	0.004	3.36134
	NSB	0.051	0.006		50	0.059	49.5798
	B0	0.164	0.119		16.667	0.059	49.5798
150(pmol/mL)	Std1	0.049	0.004		5.556	0.107	89.916
50(pmol/mL)	Std2	0.104	0.059		1.852	0.107	89.916
16.67(pmol/mL)	Std3	0.104	0.059		0.617	0.187	157.143
5.556(pmol/mL)	Std4	0.152	0.107
1.852(pmol/mL)	Std5	0.152	0.107
0.617(pmol/mL)	Std6	0.232	0.187
Set-1
BCA: Protein Estimation for cAMP ELISA
Conc	Optical Density@562nm	After Blank Correction			Optical Density@562nm		After Blank Correction		Average	y+c	y+c/m (ug/ml)	mg/mL		Kinetic cAMP ELISA	OD	After Blank Correction	%B/B0	pmol cAMP*	Protein mg/mL	pmol cAMP/mg protein
250	0.3529	0.250567		Blank	0.18115	0.175859								Blank	0.045	0
200	0.299767	0.197433		Basal	0.247769	0.248805	0.0666189	0.072946	0.0697825	0.0716825	71.6825	0.0716825		B0	0.164	0.119	100
150	0.2527	0.150367		90min	0.244276	0.260737	0.0631263	0.0848775	0.0740019	0.0759019	75.9019	0.0759019		S1	0.049	0.004	3.36134	150
100	0.200867	0.0985333		30min	0.237197	0.238443	0.056047	0.0625839	0.0593154	0.0612154	61.2154	0.0612154		S2	0.104	0.059	49.5798	50
50	0.1512	0.0488667		15min	0.243919	0.232267	0.0627688	0.0564079	0.0595884	0.0614884	61.4884	0.0614884		S3	0.104	0.059	49.5798	16.667
25	0.125733	0.0234		5min	0.261956	0.267901	0.0808055	0.0920416	0.0864236	0.0883236	88.3236	0.0883236		S4	0.152	0.107	89.916	5.556
5	0.1051	0.00276667		Basal	0.249102	0.242684	0.067952	0.0668248	0.0673884	0.0692884	69.2884	0.0692884		S5	0.152	0.107	89.916	1.852
0	0.102333	0		90min	0.223275	0.228331	0.0421253	0.052472	0.0472986	0.0491986	49.1986	0.0491986		S6	0.232	0.187	157.143	0.617
				30min	0.223276	0.222284	0.0421262	0.0464251	0.0442756	0.0461756	46.1756	0.0461756	Control	Basal	0.0988356	0.0538356	45.24	25.1525	0.0716825	350.888
				15min	0.219713	0.229091	0.038563	0.0532316	0.0458973	0.0477973	47.7973	0.0477973		90min	0.0713675	0.0263675	22.1576	92.7791	0.0759019	1222.36
				5min	0.238674	0.25284	0.0575234	0.0769808	0.0672521	0.0691521	69.1521	0.0691521		30min	0.0679429	0.0229429	19.2797	111.726	0.0612154	1825.12
														15min	0.069962	0.024962	20.9765	100.064	0.0614884	1627.37
														5min	0.0726067	0.0276067	23.1989	86.8748	0.0883236	983.597
													MS-275 Treated	Basal	0.0874732	0.0424732	35.6918	41.6491	0.0692884	601.098
														90min	0.0682727	0.0232727	19.5569	109.716	0.0491986	2230.06
														30min	0.0670974	0.0220974	18.5693	117.085	0.0461756	2535.64
														15min	0.0684346	0.0234346	19.6929	108.745	0.0477973	2275.13
														5min	0.0705882	0.0255882	21.5027	96.736	0.0691521	1398.89
Set-2															Kinetic cAMP ELISA	OD	After Blank Correction	%B/B0	pmol cAMP*	Protein mg/mL	pmol cAMP/mg protein
BCA: Protein Estimation for cAMP ELISA															Blank	0.045	0
Conc	Optical Density@562nm	After Blank Correction			Optical Density@562nm		After Blank Correction		Average	y+c	y+c/m (ug/ml)	mg/mL			B0	0.164	0.119	100
250	0.3529	0.250567		Blank	0.169113	0.176807									S1	0.049	0.004	3.36134	150
200	0.299767	0.197433		Basal	0.240544	0.245255	0.0714314	0.0684483	0.0699398	0.0718398	71.8398	0.0718398			S2	0.104	0.059	49.5798	50
150	0.2527	0.150367		90min	0.241832	0.264117	0.0727197	0.0873104	0.0800151	0.0819151	81.9151	0.0819151			S3	0.104	0.059	49.5798	16.667
100	0.200867	0.0985333		30min	0.240723	0.249038	0.0716101	0.0722313	0.0719207	0.0738207	73.8207	0.0738207			S4	0.152	0.107	89.916	5.556
50	0.1512	0.0488667		15min	0.276172	0.266654	0.107059	0.0898479	0.0984537	0.100354	100.354	0.100354			S5	0.152	0.107	89.916	1.852
25	0.125733	0.0234		5min	0.268456	0.275174	0.0993432	0.0983678	0.0988555	0.100755	100.755	0.100755			S6	0.232	0.187	157.143	0.617
5	0.1051	0.00276667		Basal	0.246591	0.248096	0.0774789	0.0712897	0.0743843	0.0762843	76.2843	0.0762843		Control	Basal	0.113238	0.0682382	57.343	14.0644	0.0718398	195.775
0	0.102333	0		90min	0.250197	0.256444	0.081084	0.0796371	0.0803606	0.0822606	82.2606	0.0822606			90min	0.067493	0.022493	18.9017	114.538	0.0819151	1398.26
				30min	0.242577	0.240567	0.0734647	0.0637603	0.0686125	0.0705125	70.5125	0.0705125			30min	0.0656593	0.0206593	17.3608	126.9	0.0738207	1719.03
				15min	0.269167	0.270592	0.100054	0.0937854	0.0969199	0.0988199	98.8199	0.0988199			15min	0.0656837	0.0206837	17.3812	126.73	0.100354	1262.83
				5min	0.275487	0.267698	0.106375	0.0908913	0.098633	0.100533	100.533	0.100533			5min	0.0676954	0.0226954	19.0718	113.263	0.100755	1124.14
														MS-275 Treated	Basal	0.0924193	0.0474193	39.8482	33.2572	0.0762843	435.965
															90min	0.063992	0.018992	15.9596	139.519	0.0822606	1696.06
															30min	0.0626305	0.0176305	14.8155	150.927	0.0705125	2140.42
															15min	0.063801	0.018801	15.7992	141.061	0.0988199	1427.46
															5min	0.0648825	0.0198825	16.708	132.607	0.100533	1319.04
Set-3
BCA: Protein Estimation for cAMP ELISA																Kinetic cAMP ELISA	OD	After Blank Correction	%B/B0	pmol cAMP*	Protein mg/mL	pmol cAMP/mg protein
Conc	Optical Density@562nm	After Blank Correction			Optical Density@562nm		After Blank Correction		Average	y+c	y+c/m (ug/ml)	mg/mL				Blank	0.045	0
250	0.3529	0.250567		Blank	0.174396	0.170441										B0	0.164	0.119	100
200	0.299767	0.197433		Basal	0.246311	0.231635	0.0719145	0.0611938	0.0665542	0.0684542	68.4542	0.0684542				S1	0.049	0.004	3.36134	150
150	0.2527	0.150367		90min	0.240356	0.240975	0.0659596	0.0705339	0.0682468	0.0701468	70.1468	0.0701468				S2	0.104	0.059	49.5798	50
100	0.200867	0.0985333		30min	0.234602	0.233996	0.0602055	0.0635552	0.0618803	0.0637803	63.7803	0.0637803				S3	0.104	0.059	49.5798	16.667
50	0.1512	0.0488667		15min	0.242275	0.24814	0.0678791	0.0776993	0.0727892	0.0746892	74.6892	0.0746892				S4	0.152	0.107	89.916	5.556
25	0.125733	0.0234		5min	0.255822	0.237536	0.0814263	0.0670957	0.074261	0.076161	76.161	0.076161				S5	0.152	0.107	89.916	1.852
5	0.1051	0.00276667		Basal	0.241906	0.246022	0.0675097	0.0755814	0.0715456	0.0734456	73.4456	0.0734456				S6	0.232	0.187	157.143	0.617
0	0.102333	0		90min	0.23432	0.232077	0.059924	0.0616359	0.06078	0.06268	62.68	0.06268			Control	Basal	0.112693	0.0676933	56.8851	14.3623	0.0684542	209.808
				30min	0.234853	0.232117	0.0604572	0.061676	0.0610666	0.0629666	62.9666	0.0629666				90min	0.0665841	0.0215841	18.1379	120.481	0.0701468	1717.55
				15min	0.245703	0.240912	0.0713065	0.0704709	0.0708887	0.0727887	72.7887	0.0727887				30min	0.0664601	0.0214601	18.0337	121.317	0.0637803	1902.12
				5min	0.248548	0.242174	0.0741515	0.071733	0.0729423	0.0748423	74.8423	0.0748423				15min	0.0679237	0.0229237	19.2636	111.843	0.0746892	1497.45
																5min	0.0686232	0.0236232	19.8515	107.629	0.076161	1413.18
															MS-275 Treated	Basal	0.0961522	0.0511522	42.985	28.2223	0.0734456	384.262
																90min	0.065123	0.020123	16.9101	130.81	0.06268	2086.95
																30min	0.0627554	0.0177554	14.9205	149.845	0.0629666	2379.76
																15min	0.0642607	0.0192607	16.1854	137.396	0.0727887	1887.6
																5min	0.0656316	0.0206316	17.3375	127.104	0.0748423	1698.3
															* calculated using Prism
															Summary Statistics
																Control			MS-275 treated
																Mean	SEM	N	Mean	SEM	N
															Basal	252.157	49.5314	3	473.775	65.3877	3
															5min	1173.64	126.456	3	1472.08	115.437	3
															15min	1462.55	106.669	3	1863.4	245	3
															30min	1815.42	53.0755	3	2351.94	114.936	3
															90min	1446.06	144.934	3	2004.36	159.589	3
															Figure legend: Source Data 1F: Time course of GLP-1R mediated cAMP generation in control and MS-275 treated pancreatic beta cells.
															Table Analyzed	cAMP kinetics ELISA
															Two-way ANOVA
															Source of Variation	% of total variation	P value
															Interaction	1.01	0.6461
															Column Factor	9.61	< 0.0001
															Row Factor	81.33	< 0.0001
															Source of Variation	P value summary	Significant?
															Interaction	ns	No
															Column Factor	***	Yes
															Row Factor	***	Yes
															Source of Variation	Df	Sum-of-squares	Mean square	F
															Interaction	4	128700	32170	0.6309
															Column Factor	1	1219000	1219000	23.91
															Row Factor	4	10310000	2578000	50.57
															Residual	20	1020000	50990
															Number of missing values	0
															Bonferroni posttests
															Control vs MS-275 treated
															Row Factor	Control	MS-275 treated	Difference	95% CI of diff.
															Basal	252.2	473.8	221.6	-303.0 to 746.2
															5min	1174	1472	298.4	-226.1 to 823.0
															15min	1463	1863	400.8	-123.7 to 925.4
															30min	1815	2352	536.5	11.93 to 1061
															90min	1446	2004	558.3	33.72 to 1083
															Row Factor	Difference	t	P value	Summary
															Basal	221.6	1.202	P > 0.05	ns
															5min	298.4	1.619	P > 0.05	ns
															15min	400.8	2.174	P > 0.05	ns
															30min	536.5	2.91	P < 0.05	*
															90min	558.3	3.028	P < 0.05	*

## Sheet: Fig1G
Source Data Figure 1F
Experiment 1
	RLU1	BGal1	RLU1/BGal1	RLU2	BGal2	RLU2/BGal2	Average	Fold1	Fold2	Av Fold
Basal (PBS)	103	0.0914714	1126.03	113	0.0925561	1220.88	1173.46	0.959587	1.04041	1
MS-275	876	0.0918122	9541.22	757	0.0900644	8405.1	8973.16	8.13086	7.16267	7.64677
Bafilomycin	113	0.093495	1208.62	113	0.0897058	1259.67	1234.15	1.02996	1.07347	1.05172
Liraglutide	610	0.0927181	6579.08	658	0.0897104	7334.71	6956.9	5.60657	6.25051	5.92854
Liraglutide+Bafilomycin	961	0.093	10333.3	887	0.092616	9577.18	9955.26	8.80588	8.16151	8.48369
MS-275 +Bafilomycin	981	0.0925948	10594.5	781	0.0918682	8501.31	9547.93	9.02849	7.24466	8.13658
MS-275+Liraglutide	4764	0.0915072	52061.5	4984	0.0900708	55334.2	53697.9	44.3659	47.1549	45.7604
MS-275+Liraglutide+Bafilomycin	6386	0.0938244	68063.3	5449	0.0930838	58538.6	63301	58.0023	49.8856	53.944
Experiment 2
	RLU1	BGal1	RLU1/BGal1	RLU2	BGal2	RLU2/BGal2	Average	Fold1	Fold2	Av Fold
Basal (PBS)	88	0.0952899	923.497	86	0.09669	889.441	906.469	1.01879	0.981215	1
MS-275	630	0.0958626	6571.91	644	0.112409	5729.1	6150.5	7.25001	6.32023	6.78512
Bafilomycin	92	0.125885	730.826	93	0.111096	837.117	783.972	0.806234	0.923492	0.864863
Liraglutide	540	0.0987448	5468.64	510	0.0985223	5176.49	5322.57	6.03291	5.71061	5.87176
Liraglutide+Bafilomycin	760	0.0942634	8062.51	739	0.0953669	7749.02	7905.77	8.89442	8.54857	8.7215
MS-275 +Bafilomycin	760	0.0963858	7884.98	739	0.0953669	7749.02	7817	8.69856	8.54857	8.62357
MS-275+Liraglutide	3941	0.0955711	41236.3	4021	0.0965486	41647.4	41441.9	45.4912	45.9447	45.7179
MS-275+Liraglutide+Bafilomycin	4821	0.0942431	51155	5310	0.10579	50193.6	50674.3	56.4332	55.3726	55.9029
Experiment 3
	RLU	Bgal	RLU/Bgal	Fold
Basal (PBS)	89	0.102298	870.007	1
MS-275	678	0.103408	6556.55	7.53621
Bafilomycin	89	0.097532	912.521	1.04887
Liraglutide	573	0.0998448	5738.91	6.5964
Liraglutide+Bafilomycin	775	0.112226	6905.69	7.93751
MS-275 +Bafilomycin	793	0.0955209	8301.84	9.54228
MS-275+Liraglutide	4109	0.0972039	42271.9	48.5881
MS-275+Liraglutide+Bafilomycin	5302	0.0963151	55048.5	63.2736
Summary statistics
	Experiment1	Experiment2	Experiment3
	Fold increase	Fold increase	Fold increase	Mean	SEM		Table Analyzed	Bafilomycin
Basal (PBS)	1	1	1
MS-275	7.64677	6.78512	7.53621	7.323	0.2707		One-way analysis of variance
Bafilomycin	1.05172	0.864863	1.04887	0.9885	0.06184		P value	< 0.0001
Liraglutide	5.92854	5.87176	6.5964				P value summary	***
Liraglutide+Bafilomycin	8.48369	8.7215	7.93751				Are means signif. different? (P < 0.05)	Yes
MS-275 +Bafilomycin	8.13658	8.62357	9.54228				Number of groups	8
MS-275+Liraglutide	45.7604	45.7179	48.5881				F	415.6
MS-275+Liraglutide+Bafilomycin	53.944	55.9029	63.2736				R squared	0.9945
Source Data 1G: Impact of Bafilomycin A1 on MS-275 induced stimulation of GLP-1R mediated cAMP generation.
							ANOVA Table	SS	df	MS
							Treatment (between columns)	10210	7	1458
							Residual (within columns)	56.15	16	3.509
							Total	10270	23
							Tukey's Multiple Comparison Test	Mean Diff.	q	Significant? P < 0.05?	Summary	95% CI of diff
							Basal vs Baf	0.01147	0.01061	No	ns	-5.285 to 5.308
							Basal vs Liraglutide	-5.132	4.745	No	ns	-10.43 to 0.1643
							Basal vs Baf +Liraglutide	-7.461	6.899	Yes	**	-12.76 to -2.165
							Basal vs MS-275	-6.323	5.846	Yes	*	-11.62 to -1.026
							Basal vs MS-275+Baf	-7.767	7.182	Yes	**	-13.06 to -2.471
							Basal vs MS-275+Liraglutide	-45.69	42.24	Yes	***	-50.99 to -40.39
							Basal vs MS-275+Baf+Liraglutide	-56.71	52.43	Yes	***	-62.00 to -51.41
							Baf vs Liraglutide	-5.144	4.756	No	ns	-10.44 to 0.1528
							Baf vs Baf +Liraglutide	-7.473	6.909	Yes	**	-12.77 to -2.176
							Baf vs MS-275	-6.334	5.856	Yes	*	-11.63 to -1.038
							Baf vs MS-275+Baf	-7.779	7.192	Yes	**	-13.08 to -2.482
							Baf vs MS-275+Liraglutide	-45.7	42.25	Yes	***	-51.00 to -40.40
							Baf vs MS-275+Baf+Liraglutide	-56.72	52.44	Yes	***	-62.01 to -51.42
							Liraglutide vs Baf +Liraglutide	-2.329	2.154	No	ns	-7.626 to 2.967
							Liraglutide vs MS-275	-1.191	1.101	No	ns	-6.487 to 4.106
							Liraglutide vs MS-275+Baf	-2.635	2.437	No	ns	-7.932 to 2.661
							Liraglutide vs MS-275+Liraglutide	-40.56	37.5	Yes	***	-45.85 to -35.26
							Liraglutide vs MS-275+Baf+Liraglutide	-51.57	47.69	Yes	***	-56.87 to -46.28
							Baf +Liraglutide vs MS-275	1.139	1.053	No	ns	-4.158 to 6.435
							Baf +Liraglutide vs MS-275+Baf	-0.3061	0.283	No	ns	-5.603 to 4.990
							Baf +Liraglutide vs MS-275+Liraglutide	-38.23	35.34	Yes	***	-43.52 to -32.93
							Baf +Liraglutide vs MS-275+Baf+Liraglutide	-49.25	45.53	Yes	***	-54.54 to -43.95
							MS-275 vs MS-275+Baf	-1.445	1.336	No	ns	-6.741 to 3.852
							MS-275 vs MS-275+Liraglutide	-39.37	36.4	Yes	***	-44.66 to -34.07
							MS-275 vs MS-275+Baf+Liraglutide	-50.38	46.58	Yes	***	-55.68 to -45.09
							MS-275+Baf vs MS-275+Liraglutide	-37.92	35.06	Yes	***	-43.22 to -32.62
							MS-275+Baf vs MS-275+Baf+Liraglutide	-48.94	45.25	Yes	***	-54.24 to -43.64
							MS-275+Liraglutide vs MS-275+Baf+Liraglutide	-11.02	10.19	Yes	***	-16.31 to -5.722

## Sheet: Fig 1H
Source Data Figure 1-H
Set 1
CONTROL	RLU1	B-GAL1	RLU2	B-GAL2	RLU1/B-GAL1	RLU2/B-GAL2	AVERAGE	FOLD1	FOLD2	AVG FOLD
PBS	9031	0.114252	8611	0.110469	79044.7	77949.2	78497	1.00698	0.993022	1
1000	33736	0.118859	34084	0.118451	283833	287748	285790	3.61585	3.66572	3.64078
500	31278	0.122997	32277	0.117727	254299	274168	264234	3.23961	3.49272	3.36616
100	36373	0.117436	32255	0.115088	309726	280264	294995	3.94571	3.57038	3.75804
50	36489	0.116133	29618	0.121029	314199	244718	279459	4.00269	3.11755	3.56012
10	25612	0.119683	27290	0.128939	213999	211650	212824	2.7262	2.69628	2.71124
1	16722	0.109376	23830	0.113458	152886	210033	181460	1.94766	2.67569	2.31168
0.1	12551	0.122502	11377	0.109149	102455	104234	103345	1.30522	1.32787	1.31654
0.01	12639	0.120831	14994	0.12163	104601	123276	113938	1.33255	1.57045	1.4515
0.001	11757	0.118229	13014	0.119346	99442.4	109044	104243	1.26683	1.38915	1.32799
0.0001	10344	0.119889	11085	0.115634	86280	95863.1	91071.5	1.09915	1.22123	1.16019
Rab5A S34N	RLU1	B-GAL1	RLU2	B-GAL2	RLU1/B-GAL1	RLU2/B-GAL2	AVERAGE	FOLD1	FOLD2	AVG FOLD
PBS	5340	0.0911053	5464	0.0920263	58613.5	59374.3	58993.9	0.993552	1.00645	1
1000	9331	0.0933133	9285	0.0937128	99996.5	99079.3	99537.9	1.69503	1.67948	1.68726
500	9542	0.0937759	9278	0.0935413	101753	99186.2	100470	1.72481	1.6813	1.70305
100	9472	0.10197	9123	0.100148	92890.4	91094.9	91992.7	1.57458	1.54414	1.55936
50	9236	0.0911653	8548	0.0915296	101311	93390.6	97350.5	1.71731	1.58305	1.65018
10	8626	0.0909708	8033	0.0919524	94821.7	87360.4	91091	1.60731	1.48084	1.54408
1	8219	0.091334	6859	0.090897	89988.4	75459	82723.7	1.52538	1.2791	1.40224
0.1	6755	0.0955185	6423	0.0910215	70719.3	70565.8	70642.5	1.19876	1.19615	1.19745
0.01	5690	0.0919746	6137	0.0901311	61864.9	68089.7	64977.3	1.04867	1.15418	1.10142
0.001	6439	0.0924293	6070	0.0892416	69664.1	68017.6	68840.8	1.18087	1.15296	1.16691
0.0001	5706	0.0915056	5622	0.0879658	62356.8	63911.2	63134	1.057	1.08335	1.07018
Set 2
CONTROL	RLU1	B-GAL1	RLU2	B-GAL2	RLU1/B-GAL1	RLU2/B-GAL2	AVERAGE	FOLD1	FOLD2	AVG FOLD
PBS	7250	0.102055	6231	0.103437	71040.4	60239.6	65640	1.08227	0.917727	1
1000	31287	0.111723	30931	0.107089	280041	288835	284438	4.26632	4.40028	4.3333
500	29390	0.111609	25690	0.111311	263330	230795	247063	4.01173	3.51608	3.76391
100	25769	0.119508	24611	0.11194	215626	219859	217742	3.28498	3.34946	3.31722
50	21509	0.113834	22793	0.1066	188950	213817	201384	2.87858	3.25743	3.068
10	19689	0.108384	18709	0.103581	181660	180622	181141	2.76751	2.75171	2.75961
1	14735	0.108735	13722	0.111714	135513	122831	129172	2.06449	1.87129	1.96789
0.1	12519	0.10476	11616	0.114549	119502	101407	110454	1.82056	1.54489	1.68273
0.01	10250	0.105234	9243	0.111653	97402.2	82783.1	90092.6	1.48388	1.26117	1.37253
0.001	8711	0.110806	8114	0.107784	78615.1	75280.3	76947.7	1.19767	1.14687	1.17227
0.0001	7568	0.104359	8002	0.11128	72519.1	71908.8	72213.9	1.1048	1.0955	1.10015
Set3
Rab5A S34N	RLU1	B-GAL1	RLU2	B-GAL2	RLU1/B-GAL1	RLU2/B-GAL2	AVERAGE	FOLD1	FOLD2	AVG FOLD
PBS	3496	0.0998717	3336	0.0955443	35004.9	34915.7	34960.3	1.00128	0.998725	1
1000	7411	0.0979139	7661	0.0947684	75689	80839.2	78264.1	2.165	2.31231	2.23865
500	6920	0.100133	6998	0.0983499	69108.1	71154.1	70131.1	1.97676	2.03528	2.00602
100	6412	0.0983901	6522	0.111626	65169.1	58427.1	61798.1	1.86409	1.67124	1.76766
50	5822	0.0966011	5922	0.0952868	60268.4	62149.2	61208.8	1.72391	1.77771	1.75081
10	5418	0.0958392	5559	0.09882	56532.2	56253.8	56393	1.61704	1.60908	1.61306
1	4900	0.0981075	4876	0.0922829	49945.2	52837.5	51391.4	1.42863	1.51136	1.46999
0.1	3876	0.0941432	3707	0.0932736	41171.3	39743.3	40457.3	1.17766	1.13681	1.15724
0.01	3618	0.105615	3637	0.107997	34256.5	33676.8	33966.6	0.979868	0.963286	0.971577
0.001	3609	0.0982862	3492	0.105423	36719.3	33123.8	34921.5	1.05031	0.947468	0.99889
0.0001	3633	0.0977447	3542	0.103672	37168.3	34165.5	35666.9	1.06316	0.977264	1.02021
Source Data 1H: Effect of Rab5A S34N dominant- negative plasmid on the MS-275 mediated augmentation of GLP-1R signaling
