# Supplementary material for: MS-275, a class 1 histone deacetylase inhibitor augments glucagon-like peptide-1 receptor agonism to improve glycemic control and reduce obesity in diet-induced obese mice
Source: eLife. 2020 Dec 22;9:e52212. doi: 10.7554/eLife.52212 (PMC7755393; doi:10.7554/eLife.52212)
Supplement: Figure 3—source data 2. — Source Data Figure 3D and Figure 3E: Relative beta arrestin1 mRNA and beta-arrestin 2 mRNA expression; the quantification was carried out using the 2-ΔΔCT method and the data normalized using GAPDH as reference. Source Data Figure 3G: Relative Adcy8 mRNA expression; the quantification was carried out using the 2-ΔΔCT method and the data normalized using GAPDH as reference. Source Data Figure 3H: Effect of chemical uncoupling of mitochondrial oxidative phosphorylation by CCCP (10 μM) on GLP-1R-mediated cAMP generation in control and MS-275-treated cultured pancreatic beta cells. Source Data Figure 3K: Relative GLUT2 mRNA expression; the quantification was carried out using the 2-ΔΔCT method and the data normalized using 18S rRNA as reference Source Data Figure 3L: Effect of MS-275 on Basal Glucose uptake in BRIN-BD11 pancreatic beta cells. [file elife-52212-fig3-data2.xlsx]

## Sheet: 3B,3D,3E,3G,3K,3L
		Source Data Figure 3B
		cT GLP-1R	cT GAPDH	delta cT	Av delta cT control	delta delta cT	2-ΔΔCT	Av
	Control	24.8736	20.8673	4.00629	4.11307	-0.106786	1.07683	1.0038
	Control	24.7199	20.6785	4.04142		-0.0716546	1.05092
	Control	24.8821	20.5906	4.29152		0.178441	0.883658
	MS-275	24.4195	21.6121	2.80743		-1.30565	2.47195	2.40049
	MS-275	24.4278	21.5075	2.92031		-1.19277	2.28591
	MS-275	24.3854	21.5614	2.82406		-1.28901	2.44361
		cT GLP-1R	cT GAPDH	delta cT	Av delta Ct control	delta delta cT	2-ΔΔCT
	Control	21.38	17.21	4.17	4.05	0.12	0.920188	1.00346
	Control	21.02	17.09	3.93		-0.12	1.08673
	MS-275	20.96	18.36	2.6		-1.45	2.73208	2.85056
	MS-275	20.96	18.48	2.48		-1.57	2.96905
		cT GLP-1R	cT GAPDH	delta cT	Av delta Ct control	delta delta cT	2-ΔΔCT
	Control	25.96	21.55	4.41	4.255	0.155	0.898132	1.00578
	Control	25.96	21.86	4.1		-0.155	1.11342
	MS-275	25.67	21.86	3.81		-0.445	1.36131	1.77875
	MS-275	26.74	23.62	3.12		-1.135	2.19619
Figure legend: Source Data Fig 3B: Relative GLP-1R mRNA expression; the quantification was carried out using the 2-ΔΔCT method and the data normalized using GAPDH as reference.
	Source Data Figure 3D & Figure 3E
	Figure 3D
	beta arrestin1
	set1	cT B-arr1	cT gapdh	delta cT	Av delta cT control	delta delta cT	2-ΔΔCT	Av
	Control	24.5504	21.2407	3.30978	3.14179	0.167991	0.890081	1.00679
	Control	24.3147	21.3409	2.9738		-0.167991	1.12349
	MS-275	24.2234	22.3463	1.87705		-1.26474	2.40284	2.06139
	MS-275	24.4117	22.0523	2.35943		-0.782357	1.71994
	set2	cT B-arr1	cT gapdh	delta cT	Av delta cT control	delta delta cT	2-ΔΔCT	Av
	Control	24.4609	21.1502	3.31063	3.2834	0.0272284	0.981304	1.00018
	Control	24.3669	21.1107	3.25618		-0.0272284	1.01905
	MS-275	24.6668	21.9721	2.69471		-0.588698	1.50389	1.53951
	MS-275	24.5875	21.9596	2.62794		-0.655465	1.57512
	set3	cT B-arr1	cT gapdh	delta cT	Av delta cT control	delta delta cT	2-ΔΔCT	Av
	Control	24.439	21.1558	3.28319	3.47963	-0.196445	1.14587	1.00928
	Control	24.7582	21.0822	3.67608		0.196445	0.872699
	MS-275	24.6903	22.2039	2.48644		-0.993194	1.99059	1.79624
	MS-275	24.8661	22.0663	2.79985		-0.679782	1.6019
		Figure 3E
		beta arrestin 2
	set1	cT B-arr2	cT gapdh	delta cT	Av delta cT control	delta delta cT	2-ΔΔCT	Av
	Control	26.3895	21.2407	5.14881	5.06957	0.0792389	0.946557	1.00151
	Control	26.3312	21.3409	4.99034		-0.0792389	1.05646
	MS-275	26.7067	22.3463	4.3604		-0.709173	1.63487	1.47935
	MS-275	26.7171	22.0523	4.66485		-0.40472	1.32383
	set2	cT B-arr2	cT gapdh	delta cT	Av delta cT control	delta delta cT	2-ΔΔCT	Av
	Control	26.3624	21.1502	5.21219	5.19074	0.0214481	0.985243	1.00011
	Control	26.28	21.1107	5.16929		-0.0214481	1.01498
	MS-275	26.8479	21.9721	4.87576		-0.314985	1.244	1.32844
	MS-275	26.6517	21.9596	4.69211		-0.498634	1.41288
	set3	cT B-arr2	cT gapdh	delta cT	Av delta cT control	delta delta cT	2-ΔΔCT	Av
	Control	26.4904	21.1558	5.33466	5.35991	-0.0252552	1.01766	1.00015
	Control	26.4673	21.0822	5.38517		0.0252552	0.982647
	MS-275	26.7636	22.2039	4.55968		-0.800238	1.74139	1.6797
	MS-275	26.732	22.0663	4.66569		-0.694227	1.61802
Figure legend: Source Data Fig 3D and Fig 3E: Relative beta arrestin1 mRNA and beta-arrestin 2 mRNA expression; the quantification was carried out using 2-ΔΔCT method and the data normalized using GAPDH as reference.
Source Data Figure 3G
		cT AC8	cT GAPDH	delta cT	Av delta cT control	delta delta cT	2-ΔΔCT	Av
	Control	28.9625	21.2407	7.72186	7.41491	0.306952	0.808348	1.02272
	Control	28.4488	21.3409	7.10796		-0.306952	1.23709
	MS-275	28.3042	22.3463	5.9579		-1.45702	2.7454	2.31496
	MS-275	28.553	22.0523	6.50071		-0.914202	1.88453
		cT AC8	cT GAPDH	delta cT	Av delta cT control	delta delta cT	2-ΔΔCT	Av
	Control	28.7095	21.1502	7.5593	7.4656	0.0936995	0.937117	1.00211
	Control	28.4826	21.1107	7.3719		-0.0936995	1.0671
	MS-275	28.3788	21.9721	6.40671		-1.0589	2.08334	2.23558
	MS-275	28.1695	21.9596	6.2099		-1.2557	2.38783
		cT AC8	cT GAPDH	delta cT	Av delta cT control	delta delta cT	2-ΔΔCT	Av
	Control	28.2857	21.1558	7.12992	7.18705	-0.057127	1.04039	1.00078
	Control	28.3263	21.0822	7.24418		0.057127	0.961176
	MS-275	28.2536	22.2039	6.04971		-1.13734	2.19975	2.2082
	MS-275	28.1049	22.0663	6.03867		-1.14838	2.21665
Figure legend Source Data Figure 3G: Relative Adcy8 mRNA expression; the quantification was carried out using 2-ΔΔCT method and the data normalized using GAPDH as reference.
	Source Data Figure 3K
	Glut2	Glut2 CT	Av Glut2 CT	18srRNA CT	Av 18srRNA CT	Δ CT	Av Δ CT	ΔΔCT	2-ΔΔCT
	Control 1	35.7006	35.7003	15.619	15.5711	20.1292	20.4079	-0.27873	1.21313
	Control 1	35.7		15.5231
	Control 2	33.7429	34.1588	13.2411	13.2419	20.9169		0.508957	0.70273
	Control 2	34.5747		13.2427
	Control 3	36.6657	36.6392	16.482	16.4615	20.1777		-0.230227	1.17302
	Control 3	36.6127		16.4409
	MS-275-1	35.8536	35.8096	15.9755	15.9506	19.8591		-0.548893	1.46296
	MS-275-1	35.7657		15.9257
	MS-275-2	33.6596	33.596	14.0088	13.9969	19.5991		-0.808816	1.75177
	MS-275-2	33.5324		13.985
	MS-275-3	37.656	37.6205	17.997	18.0417	19.5788		-0.82919	1.77669
	MS-275-3	37.585		18.0864
Source Data Fig 3K: Relative GLUT2 mRNA expression; the quantification was carried out using the 2-ΔΔCT method and the data normalized using 18S rRNA as reference
	Source Data Figure 3L
	Glucose Uptake	NF1	NF2	Av	Fold 1	Fold 2	Average Fold
	Control	146.867	150.056	148.462	0.989257	1.01074	1
	MS-275	245.597	251.87	248.734	1.65428	1.69654	1.67541
		NF1	NF2	Av	Fold 1	Fold 2	Average Fold
	Control	79.5449	72.3205	75.9327	1.04757	0.952429	1
	MS-275	90.6222	95.4566	93.0394	1.19345	1.25712	1.22529
		NF1	NF2	Av	Fold 1	Fold 2	Average Fold
	Control	23.7238	35.569	29.6464	0.800224	1.19978	1
	MS-275	41.6392	45.2595	43.4494	1.40453	1.52664	1.46559
Source Data Fig 3L: Effect of MS-275 on Basal Glucose uptake in BRIN-BD11 pancreatic beta cells.

## Sheet: 3H
Source Data Fig 3H
Experiment 1	RLU1	BGal1	RLU2	BGal2	RLU1/Bgal1	RLU2/Bgal2	Av	Fold 1	Fold2	Av Fold	StDev
Basal	115	0.085	139	0.077	1352.94	1805.19	1579.07	0.856797	1.1432	1	0.202519
10µM CCCP	79	0.0821994	104	0.085	961.078	1223.53	1092.3	0.608636	0.774843	0.691739	0.117526
10nM Lira	884	0.0786754	1193	0.0795246	11236	15001.6	13118.8	7.11562	9.50032	8.30797	1.68624
10nM Lira+10µM CCCP	160	0.097956	151	0.127638	1633.39	1183.03	1408.21	1.0344	0.749198	0.891799	0.201668
MS-275	569	0.0875479	864	0.0867614	6499.3	9958.34	8228.82	4.11591	6.30647	5.21119	1.54896
MS-275+10µM CCCP	328	0.0901422	226	0.0890452	3638.69	2538.04	3088.37	2.30433	1.6073	1.95582	0.492874
MS-275 +10nM Lira	2662	0.085968	3165	0.0891288	30965	35510.4	33237.7	19.6097	22.4882	21.0489	2.03543
MS-275 +10nM Lira+10µM CCCP	1374	0.0877276	1222	0.0888008	15662.1	13761.1	14711.6	9.91859	8.71472	9.31665	0.851264
Experiment 2	RLU1	BGal1	RLU2	BGal2	RLU1/Bgal1	RLU2/Bgal2	Av	Fold 1	Fold2	Av Fold	StDev
Basal	173	0.088474	174	0.0872951	1955.38	1993.24	1974.31	0.990411	1.00959	1	0.0135607
10µM CCCP	113	0.107273	130	0.0982273	1053.38	1323.46	1188.42	0.533546	0.670342	0.601944	0.0967292
10nM Lira	983	0.0921508	1820	0.0894013	10667.3	20357.7	15512.5	5.40306	10.3113	7.85717	3.47065
10nM Lira+10µM CCCP	136	0.0900388	162	0.0888807	1510.46	1822.67	1666.56	0.765058	0.923193	0.844126	0.111819
MS-275	624	0.0862902	607	0.0878175	7231.41	6912.07	7071.74	3.66276	3.50101	3.58188	0.114375
MS-275+10µM CCCP	374	0.091555	405	0.0929725	4084.97	4356.13	4220.55	2.06907	2.20641	2.13774	0.097115
MS-275 +10nM Lira	3010	0.085189	2292	0.0875488	35333.2	26179.7	30756.4	17.8965	13.2602	15.5783	3.27837
MS-275 +10nM Lira+10µM CCCP	1401	0.0904386	1114	0.0912869	15491.2	12203.3	13847.2	7.84639	6.18105	7.01372	1.17757
Experiment 3	RLU1	BGal1	RLU2	BGal2	RLU1/Bgal1	RLU2/Bgal2	Av	Fold 1	Fold2	Av Fold	StDev
Basal	230	0.108	245	0.10561	2129.63	2319.86	2224.74	0.957247	1.04275	1	0.060462
10µM CCCP	110	0.110826	139	0.109084	992.548	1274.24	1133.4	0.44614	0.572759	0.50945	0.0895328
10nM Lira	1780	0.109752	1860	0.110065	16218.4	16899	16558.7	7.28999	7.59595	7.44297	0.216349
10nM Lira+10µM CCCP	410	0.113375	396	0.111535	3616.33	3550.47	3583.4	1.6255	1.5959	1.6107	0.020933
MS-275	860	0.110081	920	0.108308	7812.43	8494.33	8153.38	3.51161	3.81812	3.66486	0.216735
MS-275+10µM CCCP	640	0.112611	538	0.110376	5683.3	4874.25	5278.78	2.55458	2.19093	2.37276	0.257144
MS-275 +10nM Lira	3450	0.107204	3675	0.109276	32181.6	33630.5	32906	14.4653	15.1165	14.7909	0.460496
MS-275 +10nM Lira+10µM CCCP	1940	0.108749	1860	0.112345	17839.3	16556.2	17197.7	8.01859	7.44183	7.73021	0.407835
Experiment 4	RLU1	BGal1	RLU2	BGal2	RLU1/Bgal1	RLU2/Bgal2	Av	Fold 1	Fold2	Av Fold	StDev
Basal	238	0.109966	269	0.105599	2164.31	2547.37	2355.84	0.918701	1.0813	1	0.114974
10µM CCCP	116	0.109321	128	0.108717	1061.1	1177.37	1119.23	0.450411	0.499764	0.475088	0.0348984
10nM Lira	1812	0.113918	1901	0.112352	15906.2	16920.1	16413.2	6.75183	7.18218	6.967	0.304305
10nM Lira+10µM CCCP	413	0.108783	387	0.109854	3796.56	3522.86	3659.71	1.61155	1.49537	1.55346	0.0821514
MS-275	899	0.107021	919	0.113117	8400.2	8124.32	8262.26	3.56569	3.44858	3.50714	0.0828066
MS-275+10µM CCCP	638	0.109476	590	0.10726	5827.74	5500.68	5664.21	2.47374	2.33491	2.40433	0.0981688
MS-275 +10nM Lira	3773	0.108217	3840	0.109477	34865.2	35075.8	34970.5	14.7995	14.8888	14.8442	0.063203
MS-275 +10nM Lira+10µM CCCP	1996	0.111427	2031	0.109661	17913	18520.7	18216.8	7.60365	7.8616	7.73262	0.182398
Summary statistics
	Experiment 1	Experiment 2	Experiment 3	Experiment 4
								One-way analysis of variance
	Av.Fold	Av.Fold	Av.Fold	Av.Fold	Mean	SEM		P value	< 0.0001
Basal	1	1	1	1	1	0		P value summary	***
10µM CCCP	0.691739	0.601944	0.50945	0.475088	0.569555	0.0487466		Are means signif. different? (P < 0.05)	Yes
10nM Lira	8.30797	7.85717	7.44297	6.967	7.64378	0.286506		Number of groups	8
10nM Lira+10µM CCCP	0.891799	0.844126	1.6107	1.55346	1.22502	0.206709		F	84.65
MS-275	5.21119	3.58188	3.66486	3.50714	3.99127	0.407914		R squared	0.9611
MS-275+10µM CCCP	1.95582	2.13774	2.37276	2.40433	2.21766	0.105613
MS-275 +10nM Lira	21.0489	15.5783	14.7909	14.8442	16.5656	1.50521		ANOVA Table	SS	df	MS
MS-275 +10nM Lira+10µM CCCP	9.31665	7.01372	7.73021	7.73262	7.9483	0.486476		Treatment (between columns)	831.7	7	118.8
								Residual (within columns)	33.68	24	1.404
								Total	865.3	31
								Tukey's Multiple Comparison Test	Mean Diff.	q	Significant? P < 0.05?	Summary	95% CI of diff
								Basal vs 10µM CCCP	0.4304	0.7267	No	ns	-2.344 to 3.205
								Basal vs 10nM Lira	-6.644	11.22	Yes	***	-9.418 to -3.869
								Basal vs 10nM Lira+10µM CCCP	-0.225	0.3799	No	ns	-3.000 to 2.550
								Basal vs MS-275	-2.991	5.05	Yes	*	-5.766 to -0.2167
								Basal vs MS-275+10µM CCCP	-1.218	2.056	No	ns	-3.992 to 1.557
								Basal vs MS-275 +10nM Lira	-15.57	26.28	Yes	***	-18.34 to -12.79
								Basal vs MS-275 +10nM Lira+10µM CCCP	-6.948	11.73	Yes	***	-9.723 to -4.174
								10µM CCCP vs 10nM Lira	-7.074	11.94	Yes	***	-9.849 to -4.300
								10µM CCCP vs 10nM Lira+10µM CCCP	-0.6555	1.107	No	ns	-3.430 to 2.119
								10µM CCCP vs MS-275	-3.422	5.776	Yes	**	-6.196 to -0.6471
								10µM CCCP vs MS-275+10µM CCCP	-1.648	2.782	No	ns	-4.423 to 1.126
								10µM CCCP vs MS-275 +10nM Lira	-16	27	Yes	***	-18.77 to -13.22
								10µM CCCP vs MS-275 +10nM Lira+10µM CCCP	-7.379	12.46	Yes	***	-10.15 to -4.604
								10nM Lira vs 10nM Lira+10µM CCCP	6.419	10.84	Yes	***	3.644 to 9.193
								10nM Lira vs MS-275	3.653	6.166	Yes	**	0.8779 to 6.427
								10nM Lira vs MS-275+10µM CCCP	5.426	9.16	Yes	***	2.652 to 8.201
								10nM Lira vs MS-275 +10nM Lira	-8.922	15.06	Yes	***	-11.70 to -6.147
								10nM Lira vs MS-275 +10nM Lira+10µM CCCP	-0.3045	0.5141	No	ns	-3.079 to 2.470
								10nM Lira+10µM CCCP vs MS-275	-2.766	4.67	No	ns	-5.541 to 0.008330
								10nM Lira+10µM CCCP vs MS-275+10µM CCCP	-0.9926	1.676	No	ns	-3.767 to 1.782
								10nM Lira+10µM CCCP vs MS-275 +10nM Lira	-15.34	25.9	Yes	***	-18.12 to -12.57
								10nM Lira+10µM CCCP vs MS-275 +10nM Lira+10µM CCCP	-6.723	11.35	Yes	***	-9.498 to -3.949
								MS-275 vs MS-275+10µM CCCP	1.774	2.994	No	ns	-1.001 to 4.548
								MS-275 vs MS-275 +10nM Lira	-12.57	21.23	Yes	***	-15.35 to -9.800
								MS-275 vs MS-275 +10nM Lira+10µM CCCP	-3.957	6.68	Yes	**	-6.732 to -1.182
								MS-275+10µM CCCP vs MS-275 +10nM Lira	-14.35	24.22	Yes	***	-17.12 to -11.57
								MS-275+10µM CCCP vs MS-275 +10nM Lira+10µM CCCP	-5.731	9.674	Yes	***	-8.505 to -2.956
								MS-275 +10nM Lira vs MS-275 +10nM Lira+10µM CCCP	8.617	14.55	Yes	***	5.843 to 11.39
