# Supplementary material for: MS-275, a class 1 histone deacetylase inhibitor augments glucagon-like peptide-1 receptor agonism to improve glycemic control and reduce obesity in diet-induced obese mice
Source: eLife. 2020 Dec 22;9:e52212. doi: 10.7554/eLife.52212 (PMC7755393; doi:10.7554/eLife.52212)
Supplement: Figure 4—source data 1. [file elife-52212-fig4-data1.xlsx]

## Sheet: Sheet1
Source Data Fig 4B GSIS BRIN-BD11
Insulin Standard Curve
Standard (ng/mL)		450nm	590nm	450-590 nm
Blank	0	0.1092	0.0332	0.076
Std 1	0.2	0.1304	0.0256	0.1048
Std 2	0.5	0.2109	0.0233	0.1876
Std 3	1	0.4321	0.0399	0.3922
Std 4	2	0.7592	0.0359	0.7233
Std 5	5	1.8337	0.0401	1.7936
Std 6	10	3.3918	0.0331	3.3587
Experiment1
GSIS Insulin ELISA
Category	OD 450nm		OD 590nm		(450-590nm)	Insulin secretion ng/mL (y-0.0519)/0.3342	Total cell lysate protein(μg /mL)	Normalized Insulin secretion(ng insulin secretion/μg cell lysate protein)	Fold
Glc 0.1mM	0.2298		0.0373		0.1925	0.420706	23.225	0.0181144	1
Glc 16.7mM	0.3702		0.0367		0.3335	0.842609	24.81	0.0339625	1.87489
Glc 16.7mM +MS-275	0.442		0.045		0.397	1.03262	23.425	0.0440818	2.43352
Glc 16.7mM + 0.1nM Lira	0.621		0.039		0.582	1.58618	23.88	0.0664228	3.66686
Glc 16.7mM +MS-275 + 0.1nM Lira	0.9988		0.0394		0.9594	2.71544	23.315	0.116468	6.42957
Experiment2
GSIS Insulin ELISA
Category	OD 450nm		OD 590nm		(450-590nm)	Insulin secretion ng/mL (y-0.0519)/0.3342	Total cell lysate protein(μg /mL)	Normalized Insulin secretion(ng insulin secretion/μg cell lysate protein)	Fold
Glc 0.1mM	0.2311		0.04126		0.18984	0.412747	24.49	0.0168537	1
Glc 16.7mM	0.3386		0.04009		0.29851	0.737911	24.65	0.0299356	1.7762
Glc 16.7mM +MS-275	0.3793		0.04107		0.33823	0.856762	23.46	0.0365201	2.16689
Glc 16.7mM + 0.1nM Lira	0.6086		0.04167		0.56693	1.54108	25.38	0.0607204	3.60279
Glc 16.7mM +MS-275 + 0.1nM Lira	0.8696		0.04342		0.82618	2.31682	23.56	0.0983369	5.83474
Experiment3
GSIS Insulin ELISA
Category	OD 450nm		OD 590nm		Av (450-590nm)	Insulin secretion ng/mL (y-0.0519)/0.3342	Total cell lysate protein(μg /mL)	Normalized Insulin secretion(ng insulin secretion/μg cell lysate protein)	Fold
Glc 0.1mM	0.3059		0.0353		0.2706	0.654399	34.165	0.0191541	1
Glc 16.7mM	0.583		0.0358		0.5472	1.48205	39.25	0.0377592	1.97134
Glc 16.7mM +MS-275	0.6762		0.039		0.6372	1.75135	36.77	0.0476298	2.48667
Glc 16.7mM + 0.1nM Lira	1.2038		0.0381		1.1657	3.33273	41.75	0.079826	4.16757
Glc 16.7mM +MS-275 + 0.1nM Lira	1.7815		0.0384		1.7431	5.06044	35.645	0.141968	7.41189
Summary statistics
	Experiment 1	Experiment 2	Experiment 3				Table Analyzed	Insulin secretion cultured pancreatic beta cells
	Fold	Fold	Fold	Mean	SEM
Glc 0.1mM	1	1	1	1	0		One-way analysis of variance
Glc 16.7mM	1.87489	1.7762	1.97134	1.87342	0.0563843		P value	< 0.0001
Glc 16.7mM +MS-275	2.43352	2.16689	2.48667	2.36275	0.0983956		P value summary	***
Glc 16.7mM + 0.1nM Lira	3.66686	3.60279	4.16757	3.81119	0.17916		Are means signif. different? (P < 0.05)	Yes
Glc 16.7mM +MS-275 + 0.1nM Lira	6.42957	5.83474	7.41189	6.5598	0.45891		Number of groups	5
							F	92.6
							R squared	0.9737
							ANOVA Table	SS	df	MS
							Treatment (between columns)	56.8	4	14.2
							Residual (within columns)	1.533	10	0.1533
							Total	58.33	14
							Tukey's Multiple Comparison Test	Mean Diff.	q	Significant? P < 0.05?	Summary	95% CI of diff
							Glc 0.1mM vs Glc 16.7mM	-0.8734	3.863	No	ns	-1.926 to 0.1787
							Glc 0.1mM vs Glc 16.7mM +MS-275	-1.363	6.028	Yes	*	-2.415 to -0.3106
							Glc 0.1mM vs Glc 16.7mM + 0.1nM Liraglutide	-2.811	12.43	Yes	***	-3.863 to -1.759
							Glc 0.1mM vs Glc 16.7mM +MS-275 + 0.1nM Liraglutide	-5.56	24.59	Yes	***	-6.612 to -4.508
							Glc 16.7mM vs Glc 16.7mM +MS-275	-0.4893	2.164	No	ns	-1.541 to 0.5628
							Glc 16.7mM vs Glc 16.7mM + 0.1nM Liraglutide	-1.938	8.571	Yes	***	-2.990 to -0.8856
							Glc 16.7mM vs Glc 16.7mM +MS-275 + 0.1nM Liraglutide	-4.686	20.73	Yes	***	-5.739 to -3.634
							Glc 16.7mM +MS-275 vs Glc 16.7mM + 0.1nM Liraglutide	-1.448	6.407	Yes	**	-2.501 to -0.3963
							Glc 16.7mM +MS-275 vs Glc 16.7mM +MS-275 + 0.1nM Liraglutide	-4.197	18.56	Yes	***	-5.249 to -3.145
							Glc 16.7mM + 0.1nM Liraglutide vs Glc 16.7mM +MS-275 + 0.1nM Liraglutide	-2.749	12.16	Yes	***	-3.801 to -1.696
