# Supplementary material for: MS-275, a class 1 histone deacetylase inhibitor augments glucagon-like peptide-1 receptor agonism to improve glycemic control and reduce obesity in diet-induced obese mice
Source: eLife. 2020 Dec 22;9:e52212. doi: 10.7554/eLife.52212 (PMC7755393; doi:10.7554/eLife.52212)
Supplement: Figure 5—source data 1. — MS-275 treatment and its impact on palmitate-mediated pancreatic beta-cell death. b. Source Data Figure 5G: The effect of palmitate on ROS generation in control and MS-275-treated pancreatic beta cells. [file elife-52212-fig5-data1.xlsx]

## Sheet: Figure 5A
Figure 5-source data 1
		Figure 5: Source Data 5A								Table Analyzed	Palmitate survival
										One-way analysis of variance
		SET1	OD1	OD2	Average	STD DEV	Fold	% Viability		P value	< 0.0001
		Control DMSO	0.3879	0.346928	0.367414	0.0289718	1	100		P value summary	***
		Ent 5µM+ Palmitate 200µM	0.196275	0.199449	0.197862	0.00224455	0.538525	53.8525		Are means signif. different? (P < 0.05)	Yes
		Ent 5µM+ Palmitate 150µM	0.231812	0.240961	0.236387	0.0064694	0.64338	64.338		Number of groups	8
		Ent 5µM+ Palmitate 100µM	0.332546	0.298307	0.315426	0.0242108	0.858504	85.8504		F	70.41
		Palmitate 200µM	0.103075	0.107004	0.10504	0.00277777	0.285889	28.5889		R squared	0.9686
		Palmitate 150µM	0.118747	0.120504	0.119625	0.00124207	0.325588	32.5588
		Palmitate 100µM	0.15487	0.167309	0.16109	0.00879573	0.438443	43.8443		ANOVA Table	SS	df	MS
		Ent 5µM	0.401619	0.389874	0.395746	0.00830446	1.07711	107.711		Treatment (between columns)	17900	7	2558
										Residual (within columns)	581.2	16	36.33
		SET2	OD1	OD2	Average	STD DEV	Fold	% Viability		Total	18490	23
		Control DMSO	0.377823	0.42871	0.403267	0.0359823	1	100
		Ent 5µM+ Palmitate 200µM	0.227574	0.213941	0.220758	0.00964027	0.547424	54.7424		Tukey's Multiple Comparison Test	Mean Diff.	q	Significant? P < 0.05?	Summary	95% CI of diff
		Ent 5µM+ Palmitate 150µM	0.260166	0.260644	0.260405	0.000338085	0.64574	64.574		Control vs Palmitate 200M	71.63	20.59	Yes	***	54.59 to 88.67
		Ent 5µM+ Palmitate 100µM	0.301222	0.318211	0.309717	0.0120126	0.768019	76.8019		Control vs Palmitate 200M+MS-275	40.95	11.77	Yes	***	23.91 to 57.99
		Palmitate 200µM	0.111094	0.121691	0.116393	0.00749352	0.288625	28.8625		Control vs Palmitate 150M	66.01	18.97	Yes	***	48.97 to 83.05
		Palmitate 150µM	0.116694	0.122933	0.119814	0.00441157	0.297108	29.7108		Control vs Palmitate 150M+MS-275	28.97	8.326	Yes	***	11.93 to 46.01
		Palmitate 100µM	0.155795	0.156094	0.155945	0.000211489	0.386703	38.6703		Control vs Palmitate 100M	57.31	16.47	Yes	***	40.27 to 74.35
		Ent 5µM	0.409985	0.418205	0.414095	0.005813	1.02685	102.685		Control vs Palmitate 100M+MS-275	16.02	4.605	No	ns	-1.017 to 33.06
										Control vs MS-275	-3.873	1.113	No	ns	-20.91 to 13.17
		SET3	OD1	OD2	Average	STD DEV	Fold	% Viability		Palmitate 200M vs Palmitate 200M+MS-275	-30.69	8.818	Yes	***	-47.73 to -13.65
		Control DMSO	0.414	0.407	0.4105	0.00494975	1	100		Palmitate 200M vs Palmitate 150M	-5.627	1.617	No	ns	-22.67 to 11.41
		Ent 5µM+ Palmitate 200µM	0.269	0.294	0.2815	0.0176777	0.685749	68.5749		Palmitate 200M vs Palmitate 150M+MS-275	-42.66	12.26	Yes	***	-59.70 to -25.62
		Ent 5µM+ Palmitate 150µM	0.349	0.342	0.3455	0.00494975	0.841657	84.1657		Palmitate 200M vs Palmitate 100M	-14.32	4.115	No	ns	-31.36 to 2.721
		Ent 5µM+ Palmitate 100µM	0.38	0.353	0.3665	0.0190919	0.892814	89.2814		Palmitate 200M vs Palmitate 100M+MS-275	-55.61	15.98	Yes	***	-72.65 to -38.57
		Palmitate 200µM	0.111	0.116	0.1135	0.00353553	0.276492	27.6492		Palmitate 200M vs MS-275	-75.51	21.7	Yes	***	-92.55 to -58.47
		Palmitate 150µM	0.158	0.168	0.163	0.00707107	0.397077	39.7077		Palmitate 200M+MS-275 vs Palmitate 150M	25.06	7.201	Yes	**	8.019 to 42.10
		Palmitate 100µM	0.187	0.187	0.187	0	0.455542	45.5542		Palmitate 200M+MS-275 vs Palmitate 150M+MS-275	-11.97	3.441	No	ns	-29.01 to 5.067
		Ent 5µM	0.42	0.411	0.4155	0.00636396	1.01218	101.218		Palmitate 200M+MS-275 vs Palmitate 100M	16.37	4.703	No	ns	-0.6741 to 33.41
										Palmitate 200M+MS-275 vs Palmitate 100M+MS-275	-24.92	7.162	Yes	**	-41.96 to -7.883
		Summary Statistics								Palmitate 200M+MS-275 vs MS-275	-44.82	12.88	Yes	***	-61.86 to -27.78
										Palmitate 150M vs Palmitate 150M+MS-275	-37.03	10.64	Yes	***	-54.07 to -19.99
										Palmitate 150M vs Palmitate 100M	-8.693	2.498	No	ns	-25.73 to 8.347
		Treatment	Expt1	Expt2	Expt3	Mean	SEM			Palmitate 150M vs Palmitate 100M+MS-275	-49.98	14.36	Yes	***	-67.02 to -32.94
			% viability	% viability	% viability					Palmitate 150M vs MS-275	-69.88	20.08	Yes	***	-86.92 to -52.84
		Control DMSO	100	100	100	100	0			Palmitate 150M+MS-275 vs Palmitate 100M	28.34	8.144	Yes	***	11.30 to 45.38
		Ent 5µM+ Palmitate 200µM	53.8525	54.7424	68.5749					Palmitate 150M+MS-275 vs Palmitate 100M+MS-275	-12.95	3.721	No	ns	-29.99 to 4.091
		Ent 5µM+ Palmitate 150µM	64.338	64.574	84.1657					Palmitate 150M+MS-275 vs MS-275	-32.85	9.439	Yes	***	-49.89 to -15.81
		Ent 5µM+ Palmitate 100µM	85.8504	76.8019	89.2814					Palmitate 100M vs Palmitate 100M+MS-275	-41.29	11.87	Yes	***	-58.33 to -24.25
		Palmitate 200µM	28.5889	28.8625	27.6492					Palmitate 100M vs MS-275	-61.19	17.58	Yes	***	-78.23 to -44.15
		Palmitate 150µM	32.5588	29.7108	39.7077					Palmitate 100M+MS-275 vs MS-275	-19.9	5.718	Yes	*	-36.94 to -2.856
		Palmitate 100µM	43.8443	38.6703	45.5542											-58.31 to -24.29
		Ent 5µM	107.711	102.685	101.218											-78.23 to -44.21
		Figure 5-Source Data 1: Source Data Figure 5A: MS-275 treatment and its impact on palmitate mediated pancreatic beta-cell death. Ent: Entinostat=MS-275														-36.93 to -2.913

## Sheet: Figure 5G
Figure 5-source data 1
		Figure 5: Source Data 5G
		Set1															Table Analyzed	Palmitate ROS
		Treatment	Rep1	Rep2	Rep3	Protein	Normalized 1	Normalized 2	Normalized 3	Average	Fold1	Fold2	Fold3	Average Fold
		BSA Control	16313	16092	15790	28.0984	580.568	572.703	561.955	571.742	1.01544	1.00168	0.982882	1			One-way analysis of variance
		150µM Pal	11897	11652	11600	8.31341	1431.06	1401.59	1395.34	1409.33	2.50299	2.45144	2.4405	2.46498			P value	< 0.0001
		100µM Pal	16303	15491	15773	18.3348	889.186	844.898	860.279	864.787	1.55522	1.47776	1.50466	1.51255			P value summary	***
		MS-275 Control	14154	14009	14033	27.0898	522.485	517.133	518.019	519.212	0.913849	0.904487	0.906036	0.908124			Are means signif. different? (P < 0.05)	Yes
		M+150µM Pal	12113	12925	12638	18.8889	641.275	684.263	669.069	664.869	1.12162	1.1968	1.17023	1.16288			Number of groups	7
		M+100µM Pal	13271	12996	13488	28.4496	466.474	456.808	474.102	465.794	0.815882	0.798976	0.829223	0.814694			F	187.7
		H2O2 (200µM)	17187	17218	17213	11.0525	1555.03	1557.83	1557.38	1556.74	2.7198	2.72471	2.72392	2.72281			R squared	0.9877
																	ANOVA Table	SS	df	MS
		Set2															Treatment (between columns)	8.895	6	1.483
		Treatment	Rep1	Rep2	Rep3	Protein	Normalized 1	Normalized 2	Normalized 3	Average	Fold1	Fold2	Fold3	Average Fold			Residual (within columns)	0.1106	14	0.007898
		BSA Control	8931	8790	8697	38.2761	233.331	229.647	227.217	230.065	1.01419	0.998183	0.987622	1			Total	9.006	20
		150µM Pal	11758	11639	11921	21.9903	534.689	529.278	542.102	535.356	2.32408	2.30056	2.3563	2.32698
		100µM Pal	11978	11660	11583	35.6693	335.807	326.892	324.733	329.144	1.45962	1.42087	1.41148	1.43066			Tukey's Multiple Comparison Test	Mean Diff.	q	Significant? P < 0.05?	Summary	95% CI of diff
		MS-275 Control	9109	9131	9232	41.8115	217.858	218.385	220.8	219.014	0.946943	0.94923	0.95973	0.951968			BSA Control vs MS-275	0.07085	1.381	No	ns	-0.1769 to 0.3186
		M+150µM Pal	9177	9367	9210	34.0557	269.471	275.05	270.44	271.653	1.17128	1.19553	1.17549	1.18077			BSA Control vs Palmitate (100M)	-0.4859	9.47	Yes	***	-0.7337 to -0.2381
		M+100µM Pal	8782	9017	8899	40.606	216.273	222.061	219.155	219.163	0.940053	0.965208	0.952577	0.952613			BSA Control vs Palmitate (100M) +MS-275	0.1079	2.102	No	ns	-0.1399 to 0.3556
		H2O2 (200µM)	12577	12572	12480	22.2458	565.365	565.14	561.005	563.837	2.45741	2.45644	2.43846	2.45077			BSA Control vs Palmitate (150M)	-1.312	25.57	Yes	***	-1.560 to -1.064
																	BSA Control vs Palmitate (150M)+MS-275	-0.1664	3.244	No	ns	-0.4142 to 0.08134
																	BSA Control vs H202	-1.618	31.54	Yes	***	-1.866 to -1.370
		Set3															MS-275 vs Palmitate (100M)	-0.5568	10.85	Yes	***	-0.8045 to -0.3090
		Treatment	Rep1	Rep2	Rep3	Protein	Normalized 1	Normalized 2	Normalized 3	Average	Fold1	Fold2	Fold3	Average Fold			MS-275 vs Palmitate (100M) +MS-275	0.03701	0.7214	No	ns	-0.2108 to 0.2848
		BSA Control	10357	10239	10568	30.8263	335.979	332.151	342.824	336.985	0.997016	0.985657	1.01733	1			MS-275 vs Palmitate (150M)	-1.383	26.95	Yes	***	-1.631 to -1.135
		150µM Pal	14920	14934	14944	20.6677	721.898	722.575	723.059	722.511	2.14223	2.14424	2.14567	2.14405			MS-275 vs Palmitate (150M)+MS-275	-0.2373	4.625	No	ns	-0.4850 to 0.01049
		100µM Pal	13478	13482	13427	26.3772	510.972	511.124	509.038	510.378	1.51631	1.51676	1.51057	1.51454			MS-275 vs H202	-1.689	32.92	Yes	***	-1.937 to -1.441
		MS-275 Control	9551	9572	9530	30.5627	312.506	313.193	311.818	312.506	0.927359	0.929398	0.92532	0.927359			Palmitate (100M) vs Palmitate (100M) +MS-275	0.5938	11.57	Yes	***	0.3460 to 0.8416
		M+150µM Pal	10591	10540	10580	27.1431	390.192	388.313	389.787	389.431	1.15789	1.15232	1.15669	1.15563			Palmitate (100M) vs Palmitate (150M)	-0.8261	16.1	Yes	***	-1.074 to -0.5783
		M+100µM Pal	10056	10226	10236	33.2058	302.839	307.959	308.26	306.352	0.898673	0.913866	0.914759	0.9091			Palmitate (100M) vs Palmitate (150M)+MS-275	0.3195	6.227	Yes	**	0.07172 to 0.5673
		H2O2 (200µM)	19297	19293	19244	21.3387	904.318	904.13	901.834	903.427	2.68356	2.683	2.67619	2.68092			Palmitate (100M) vs H202	-1.132	22.07	Yes	***	-1.380 to -0.8845
																	Palmitate (100M) +MS-275 vs Palmitate (150M)	-1.42	27.67	Yes	***	-1.668 to -1.172
		Summary Statistics:															Palmitate (100M) +MS-275 vs Palmitate (150M)+MS-275	-0.2743	5.346	Yes	*	-0.5221 to -0.02652
			Expt1	Expt 2	Expt3	Mean	SEM										Palmitate (100M) +MS-275 vs H202	-1.726	33.64	Yes	***	-1.974 to -1.478
		Treatment															Palmitate (150M) vs Palmitate (150M)+MS-275	1.146	22.33	Yes	***	0.8978 to 1.393
		BSA Control	1	1	1	1	0										Palmitate (150M) vs H202	-0.3062	5.967	Yes	*	-0.5539 to -0.05840
		150µM Pal	2.46498	2.32698	2.14405	2.312	0.09295										Palmitate (150M)+MS-275 vs H202	-1.452	28.29	Yes	***	-1.700 to -1.204
		100µM Pal	1.51255	1.43066	1.51454	1.486	0.02764
		MS-275 Control	0.908124	0.951968	0.927359	0.9292	0.01
		M+150µM Pal	1.16288	1.18077	1.15563	1.166	0.007469
		M+100µM Pal	0.814694	0.952613	0.9091	0.8921	0.04071
		H2O2 (200µM)	2.72281	2.45077	2.68092	2.618	0.08457
		Figure 5 Source Data 1 :Source Data Figure 5G: The effect of palmitate on ROS generation in control and MS-275 treated pancreatic beta cells. Pal: Palmitate; M: ms-275
