# Supplementary material for: MS-275, a class 1 histone deacetylase inhibitor augments glucagon-like peptide-1 receptor agonism to improve glycemic control and reduce obesity in diet-induced obese mice
Source: eLife. 2020 Dec 22;9:e52212. doi: 10.7554/eLife.52212 (PMC7755393; doi:10.7554/eLife.52212)
Supplement: Figure 7—source data 1. — Effect of acute MS-275 and liraglutide monotherapy and combined therapy on fasting blood sugar in C57BL/6 DIO male mice b. Source Data Figure 7B: Effect of chronic MS-275 and liraglutide-combined therapy on fasting blood sugar in C57BL/6 male mice fed a high-fat diet. c. Source Data Figure 7C and Figure 7D: Intraperitoneal glucose tolerance test (IPGTT) in C57BL/6 male mice fed on chow diet, high-fat diet and receiving intraperitoneal injection of MS-275 (5mg/kg body weight, every alternate day), subcutaneous injection of liraglutide (3 nmol/kg body weight twice weekly) or combined MS-275 and liraglutide co-therapy. [file elife-52212-fig7-data1.xlsx]

## Sheet: Fig7A 7B
Figure 7 source data 1: source dataFigure 7A							Figure 7 source data 1 : source data Figure 7B
Fasting Blood Sugar Acute							Fasting Blood Sugar Chronic
	vehicle Control	Liraglutide	MS-275	Liraglutide +MS-275				vehicle Control	Liraglutide	MS-275	Liraglutide +MS-275			Fig 7A :Shapiro-Wilk analysis																								0
Mice # 1	145	111	102	95			Mice # 1	139	76	92	79
Mice # 2	144	103	112	92			Mice # 2	146	85	115	83
Mice # 3	163	113	111	102			Mice # 3	97	79	120	80
Mice # 4	141	117	104	76			Mice # 4	129	65	78	71			Vehicle	Summary statistics:												Liraglutide	Summary statistics:
Mice # 5	150	100	115	90			Mice # 5	189	108	67	100
Mice # 6	158	95	121	93			Mice # 6	143	122	107	67				Variable	Observations	Obs. with missing data	Obs. without missing data	Minimum	Maximum	Mean	Std. deviation						Variable	Observations	Obs. with missing data	Obs. without missing data	Minimum	Maximum	Mean	Std. deviation
Source Data Fig 7A: Effect of acute MS-275 and liraglutide monotherapy and combined therapy on fasting blood sugar in C57BL/6 DIO male mice							Source Data Fig 7B: Effect of chronic MS-275 and liraglutide-combined therapy on fasting blood sugar in C57BL/6 male mice fed a high-fat diet.								Var1	6	0	6	141	163	150.167	8.65833						Var1	6	0	6	95	117	106.5	8.47939
Summary statistics	vehicle Control	Liraglutide	MS-275	Liraglutide +MS-275			Summary statistics	vehicle Control	Liraglutide	MS-275	Liraglutide +MS-275				Shapiro-Wilk test (Var1):													Shapiro-Wilk test :
Number of values	6	6	6	6			Number of values	6	6	6	6
															W	0.914712												W	0.952083
Minimum	141	95	102	76			Minimum	97	65	67	67				p-value	0.468115												p-value	0.757117
25% Percentile	143.3	98.75	103.5	86.5			25% Percentile	121	73.25	75.25	70				alpha	0.05												alpha	0.05
Median	147.5	107	111.5	92.5			Median	141	82	99.5	79.5
75% Percentile	159.3	114	116.5	96.75			75% Percentile	156.8	111.5	116.3	87.25				Test interpretation:													Test interpretation:
Maximum	163	117	121	102			Maximum	189	122	120	100				H0: The sample follows a Normal distribution.													H0: The sample follows a Normal distribution.
															Ha: The sample does not follow a Normal distribution.													Ha: The sample does not follow a Normal distribution.
Mean	150.2	106.5	110.8	91.33			Mean	140.5	89.17	96.5	80				As the computed p-value is greater than the significance level alpha=0.05, one cannot reject the null hypothesis H0.													As the computed p-value is greater than the significance level alpha=0.05, one cannot reject the null hypothesis H0.
Std. Deviation	8.658	8.479	7.026	8.571			Std. Deviation	29.72	21.5	21.15	11.49				The risk to reject the null hypothesis H0 while it is true is 46.81%.													The risk to reject the null hypothesis H0 while it is true is 75.71%.
Std. Error	3.535	3.462	2.868	3.499			Std. Error	12.13	8.777	8.636	4.69
														MS-275	Summary statistics:												Lira +MS-275	Summary statistics:
Lower 95% CI of mean	141.1	97.6	103.5	82.34			Lower 95% CI of mean	109.3	66.61	74.3	67.94
Upper 95% CI of mean	159.3	115.4	118.2	100.3			Upper 95% CI of mean	171.7	111.7	118.7	92.06				Variable	Observations	Obs. with missing data	Obs. without missing data	Minimum	Maximum	Mean	Std. deviation						Variable	Observations	Obs. with missing data	Obs. without missing data	Minimum	Maximum	Mean	Std. deviation
															Var1	6	0	6	102	121	110.833	7.02614						Var1	6	0	6	76	102	91.3333	8.57127
D'Agostino & Pearson omnibus normality test							D'Agostino & Pearson omnibus normality test
K2	N too small	N too small	N too small	N too small			K2	N too small	N too small	N too small	N too small
P value							P value								Shapiro-Wilk test (Var1):													Shapiro-Wilk test (Var1):
Passed normality test (alpha=0.05)?							Passed normality test (alpha=0.05)?
P value summary							P value summary								W	0.95988												W	0.902641
															p-value	0.818815												p-value	0.389776
Shapiro-Wilk normality test							Shapiro-Wilk normality test								alpha	0.05												alpha	0.05
W	N too small	N too small	N too small	N too small			W	N too small	N too small	N too small	N too small
P value							P value								Test interpretation:													Test interpretation:
Passed normality test (alpha=0.05)?							Passed normality test (alpha=0.05)?								H0: The sample follows a Normal distribution.													H0: The sample follows a Normal distribution.
P value summary							P value summary								Ha: The sample does not follow a Normal distribution.													Ha: The sample does not follow a Normal distribution.
															As the computed p-value is greater than the significance level alpha=0.05, one cannot reject the null hypothesis H0.													As the computed p-value is greater than the significance level alpha=0.05, one cannot reject the null hypothesis H0.
Sum	901	639	665	548			Sum	843	535	579	480				The risk to reject the null hypothesis H0 while it is true is 81.88%.													The risk to reject the null hypothesis H0 while it is true is 38.98%.
Table Analyzed	Fasting blood sugar acute						Table Analyzed	Fasting blood sugar chronic						Fig 7B: Shapiro-Wilk test
Kruskal-Wallis test							Kruskal-Wallis test
P value	0.0003						P value	0.0108
Exact or approximate P value?	Gaussian Approximation						Exact or approximate P value?	Gaussian Approximation						Vehicle	Summary statistics:												Liraglutide
P value summary	***						P value summary	*																				Summary statistics:
Do the medians vary signif. (P < 0.05)	Yes						Do the medians vary signif. (P < 0.05)	Yes							Variable	Observations	Obs. with missing data	Obs. without missing data	Minimum	Maximum	Mean	Std. deviation
Number of groups	4						Number of groups	4							Var1	6	0	6	97	189	140.5	29.717						Variable	Observations	Obs. with missing data	Obs. without missing data	Minimum	Maximum	Mean	Std. deviation
Kruskal-Wallis statistic	18.71						Kruskal-Wallis statistic	11.17																				Var1	6	0	6	65	122	89.1667	21.4981
Dunn's Multiple Comparison Test	Difference in rank sum	Significant? P < 0.05?	Summary				Dunn's Multiple Comparison Test	Difference in rank sum	Significant? P < 0.05?	Summary					Shapiro-Wilk test
vehicle vs Liraglutide	10.33	No	ns				Vehicle vs Liraglutide	10.58	No	ns																		Shapiro-Wilk test
vehicle vs MS-275	8.167	No	ns				Vehicle vs MS-275	8.75	No	ns					W	0.935731
vehicle vs Liraglutide +MS-275	17.5	Yes	***				Vehicle vs MS-275+Liraglutide	12.67	Yes	*					p-value	0.62503												W	0.922135
Liraglutide vs MS-275	-2.167	No	ns				Liraglutide vs MS-275	-1.833	No	ns					alpha	0.05												p-value	0.520869
Liraglutide vs Liraglutide +MS-275	7.167	No	ns				Liraglutide vs MS-275+Liraglutide	2.083	No	ns																		alpha	0.05
MS-275 vs Liraglutide +MS-275	9.333	No	ns				MS-275 vs MS-275+Liraglutide	3.917	No	ns					Test interpretation:
															H0: The sample follows a Normal distribution.													Test interpretation:
Table Analyzed	Fasting blood sugar acute														Ha: The sample does not follow a Normal distribution.													H0: The sample follows a Normal distribution.
							Table Analyzed	Fasting blood sugar chronic							As the computed p-value is greater than the significance level alpha=0.05, one cannot reject the null hypothesis H0.													Ha: The sample does not follow a Normal distribution.
One-way analysis of variance															The risk to reject the null hypothesis H0 while it is true is 62.50%.													As the computed p-value is greater than the significance level alpha=0.05, one cannot reject the null hypothesis H0.
P value	< 0.0001						One-way analysis of variance							MS-275	Summary statistics:													The risk to reject the null hypothesis H0 while it is true is 52.09%.
P value summary	***						P value	0.0006																			Lira +MS-275
Are means signif. different? (P < 0.05)	Yes						P value summary	***							Variable	Observations	Obs. with missing data	Obs. without missing data	Minimum	Maximum	Mean	Std. deviation						Summary statistics:
Number of groups	4						Are means signif. different? (P < 0.05)	Yes							Var1	6	0	6	67	120	96.5	21.1542
F	55.95						Number of groups	4																				Variable	Observations	Obs. with missing data	Obs. without missing data	Minimum	Maximum	Mean	Std. deviation
R squared	0.8935						F	8.979																				Var1	6	0	6	67	100	80	11.4891
							R squared	0.5739							Shapiro-Wilk test
Bartlett's test for equal variances
Bartlett's statistic (corrected)	0.2568						Bartlett's test for equal variances								W	0.936986												Shapiro-Wilk test
P value	0.9679						Bartlett's statistic (corrected)	3.689							p-value	0.635022
P value summary	ns						P value	0.2971							alpha	0.05												W	0.922498
Do the variances differ signif. (P < 0.05)	No						P value summary	ns																				p-value	0.523528
							Do the variances differ signif. (P < 0.05)	No							Test interpretation:													alpha	0.05
ANOVA Table	SS	df	MS												H0: The sample follows a Normal distribution.
Treatment (between columns)	11320	3	3772				ANOVA Table	SS	df	MS					Ha: The sample does not follow a Normal distribution.													Test interpretation:
Residual (within columns)	1349	20	67.43				Treatment (between columns)	12960	3	4321					As the computed p-value is greater than the significance level alpha=0.05, one cannot reject the null hypothesis H0.													H0: The sample follows a Normal distribution.
Total	12660	23					Residual (within columns)	9624	20	481.2					The risk to reject the null hypothesis H0 while it is true is 63.50%.													Ha: The sample does not follow a Normal distribution.
							Total	22590	23																			As the computed p-value is greater than the significance level alpha=0.05, one cannot reject the null hypothesis H0.
Tukey's Multiple Comparison Test	Mean Diff.	q	Significant? P < 0.05?	Summary	95% CI of diff																							The risk to reject the null hypothesis H0 while it is true is 52.35%.
vehicle vs Liraglutide	43.67	13.03	Yes	***	30.40 to 56.93		Tukey's Multiple Comparison Test	Mean Diff.	q	Significant? P < 0.05?	Summary	95% CI of diff
vehicle vs MS-275	39.33	11.73	Yes	***	26.07 to 52.60		Vehicle vs Liraglutide	51.33	5.732	Yes	**	15.89 to 86.78
vehicle vs Liraglutide +MS-275	58.83	17.55	Yes	***	45.57 to 72.10		Vehicle vs MS-275	44	4.913	Yes	*	8.555 to 79.45
Liraglutide vs MS-275	-4.333	1.293	No	ns	-17.60 to 8.935		Vehicle vs MS-275+Liraglutide	60.5	6.756	Yes	***	25.05 to 95.95
Liraglutide vs Liraglutide +MS-275	15.17	4.524	Yes	*	1.899 to 28.43		Liraglutide vs MS-275	-7.333	0.8189	No	ns	-42.78 to 28.11
MS-275 vs Liraglutide +MS-275	19.5	5.817	Yes	**	6.232 to 32.77		Liraglutide vs MS-275+Liraglutide	9.167	1.024	No	ns	-26.28 to 44.61
							MS-275 vs MS-275+Liraglutide	16.5	1.842	No	ns	-18.95 to 51.95

## Sheet: Fig 7C 7D
Figure 7 source data 1: source dataFigure 7C and Fig 7D
Source data Fasting Blood Sugar Figure 7C and 7D
												Significance: Fig 7C						Significance 7D										Fig 7D :Shapiro-Wilk test (IPGTT AUC)
IpGTT																		Table Analyzed	AUC IpGTT
Normal Saline (vehicle control)									AUC (Normal saline)			Table Analyzed	IpGTT
	NS1	NS2	NS4	NS5	NS3	NS6			Mice	AUC								Kruskal-Wallis test								mean	StDev		Summary statistics:
0 min	139	146	129	189	97	143			NS1	27210		Two-way RM ANOVA	Matching by cols					P value	0.0038					Vehicle	27210	29321.5	4322.11	Vehicle															vehicle minus NS2		Summary statistics:
15 min	281	348	253	265	244	269			NS2	38130								Exact or approximate P value?	Gaussian Approximation						38130				Variable	Observations	Obs. with missing data	Obs. without missing data	Minimum	Maximum	Mean	Std. deviation
30 min	309	442	283	234	316	364			NS3	27878		Source of Variation	% of total variation	P value				P value summary	**						27773				Var1	6	0	6	27210	38130	29321.5	4322.11									Variable	Observations	Obs. with missing data	Obs. without missing data	Minimum
60 min	220	384	256	233	275	260			NS4	27540		Interaction	6.35	< 0.0001				Do the medians vary signif. (P < 0.05)	Yes						27540																				Var1	5	0	5	27210
90 min	190	240	201	232	215	140			NS5	27773		Time	38.17	< 0.0001				Number of groups	5						27878
120 min	180	210	180	211	112	140			NS6	27398		Column Factor	26.79	< 0.0001				Kruskal-Wallis statistic	15.5						27398				Shapiro-Wilk test :
Liraglutide												Subjects (matching)	17.4765	< 0.0001												mean	StDev																		Shapiro-Wilk test :
	L1	L2	L3	L5	L4	L6			AUC (Liraglutide)									Dunn's Multiple Comparison Test	Difference in rank sum	Significant? P < 0.05?	Summary			Liraglutide	15585	22595.3	9065.94		W	0.551404
0 min	76	85	79	108	65	122			L1	15585		Source of Variation	P value summary	Significant?				Vehicle vs Liraglutide	7.833	No	ns				16343				p-value	0.000113669															W	0.966316
15 min	189	216	259	274	146	237			L2	16343		Interaction	***	Yes				Vehicle vs MS-275	10	No	ns				22088				alpha	0.05															p-value	0.851123
16 min	156	240	228	350	176	471			L3	22088		Time	***	Yes				Vehicle vs MS-275+Liraglutide	16.5	Yes	*				32100																				alpha	0.05
17 min	152	108	200	290	126	384			L5	32100		Column Factor	***	Yes				Vehicle vs Control	17.33	Yes	**				14168				Test interpretation:
18 min	95	85	158	249	93	189			L4	14168		Subjects (matching)	***	Yes				Liraglutide vs MS-275	2.167	No	ns				35288				H0: The sample follows a Normal distribution.																Test interpretation:
19 min	84	85	116	209	64	202			L6	35288								Liraglutide vs MS-275+Liraglutide	8.667	No	ns					mean	StDev		Ha: The sample does not follow a Normal distribution.																H0: The sample follows a Normal distribution.
MS-275												Source of Variation	Df	Sum-of-squares	Mean square	F		Liraglutide vs Control	9.5	No	ns			MS-275	15173	17732.8	2713.9		As the computed p-value is lower than the significance level alpha=0.05, one should reject the null hypothesis H0, and accept the alternative hypothesis Ha.																Ha: The sample does not follow a Normal distribution.
	MS-1	MS-2	MS-4	MS-5	MS-3	MS-6			AUC (MS-275)			Interaction	20	70470	3524	3.54		MS-275 vs MS-275+Liraglutide	6.5	No	ns				17535				The risk to reject the null hypothesis H0 while it is true is lower than 0.01%.																As the computed p-value is greater than the significance level alpha=0.05, one cannot reject the null hypothesis H0.
0 min	92	115	78	120	67	107			MS-1	15173		Time	5	423600	84730	85.12		MS-275 vs Control	7.333	No	ns				16613																				The risk to reject the null hypothesis H0 while it is true is 85.11%.
15 min	197	198	251	188	186	308			MS-2	17535		Column Factor	4	297300	74320	9.58		MS-275+Liraglutide vs Control	0.8333	No	ns				18825			Liraglutide	Summary statistics:											MS-275		Summary statistics:
30 min	175	183	209	242	180	284			MS-4	16613		Subjects (matching)	25	193900	7758	7.794		Significance 7D							15668
60 min	111	149	121	151	138	174			MS-5	18825		Residual	125	124400	995.4			Table Analyzed	AUC IpGTT						22583				Variable	Observations	Obs. with missing data	Obs. without missing data	Minimum	Maximum	Mean	Std. deviation						Variable	Observations	Obs. with missing data	Obs. without missing data	Minimum	Maximum	Mean	Std. deviation
90 min	97	123	91	121	104	130			MS-3	15668																mean	StDev		Var1	6	0	6	14168	35288	22595.3	9065.94						Var1	6	0	6	15173	22583	17732.8	2713.9
120 min	90	95	80	100	71	110			MS-6	22583		Number of missing values	0					One-way analysis of variance						Lira +MS-275	15848	14809	3089.53
Liraglutide +MS-275																		P value	< 0.0001						15623
	LMS-1	LMS-2	LMS-3	LMS-4	LMS-5	LMS-6			AUC (Liraglutide+MS-275)			Bonferroni posttests						P value summary	***						14408				Shapiro-Wilk test:													Shapiro-Wilk test
0 min	79	83	80	71	100	67			LMS-1	15848								Are means signif. different? (P < 0.05)	Yes						13440
15 min	164	193	209	153	250	157			LMS-2	15623		Normal Saline vs Liraglutide						Number of groups	5						19455				W	0.852969												W	0.89218
30 min	198	150	137	141	210	103			LMS-3	14408		Column Factor	Normal Saline	Liraglutide	Difference	95% CI of diff.		F	9.283						10080				p-value	0.166319												p-value	0.329767
60 min	110	144	119	103	179	71			LMS-4	13440		0.0000	140.5	89.17	-51.33	-134.7 to 31.99		R squared	0.5976					Control Chow		mean	StDev		alpha	0.05												alpha	0.05
90 min	123	100	89	100	119	60			LMS-5	19455		15.00	276.7	220.2	-56.5	-139.8 to 26.83									15338	15040.2	1902.02
120 min	90	94	90	90	86	65			LMS-6	10080		30.00	324.7	270.2	-54.5	-137.8 to 28.83		Bartlett's test for equal variances							15645				Test interpretation:													Test interpretation:
Chow diet												60.00	271.3	210	-61.33	-144.7 to 21.99		Bartlett's statistic (corrected)	14.23						13305				H0: The sample follows a Normal distribution.													H0: The sample follows a Normal distribution.
	Chow1	Chow 2	Chow 3	Chow 4	Chow 5	Chow 6			AUC (chow diet)			90.00	203	144.8	-58.17	-141.5 to 25.16		P value	0.0066						12735				Ha: The sample does not follow a Normal distribution.													Ha: The sample does not follow a Normal distribution.
Fasting	100	84	98	93	108	99			Chow 1	15338		120.0	172.2	126.7	-45.5	-128.8 to 37.83		P value summary	**						18090				As the computed p-value is greater than the significance level alpha=0.05, one cannot reject the null hypothesis H0.													As the computed p-value is greater than the significance level alpha=0.05, one cannot reject the null hypothesis H0.
15 min	230	215	161	156	209	220			Chow 2	15645								Do the variances differ signif. (P < 0.05)	Yes						15128				The risk to reject the null hypothesis H0 while it is true is 16.63%.													The risk to reject the null hypothesis H0 while it is true is 32.98%.
30 min	129	150	132	127	180	126			Chow 3	13305		Column Factor	Difference	t	P value	Summary
60 min	123	125	98	93	171	126			Chow 4	12735		0.0000	-51.33	1.93	P > 0.05	ns		ANOVA Table	SS	df	MS							Lira +MS-275	Summary statistics:											Control Chow		Summary statistics:
90 min	103	111	95	90	115	100			Chow 5	18090		15.00	-56.5	2.124	P > 0.05	ns		Treatment (between columns)	901600000	4	225400000
120 min	97	89	93	90	101	98			Chow 6	15128		30.00	-54.5	2.049	P > 0.05	ns		Residual (within columns)	607000000	25	24280000								Variable	Observations	Obs. with missing data	Obs. without missing data	Minimum	Maximum	Mean	Std. deviation						Variable	Observations	Obs. with missing data	Obs. without missing data	Minimum	Maximum	Mean	Std. deviation
												60.00	-61.33	2.306	P > 0.05	ns		Total	1509000000	29									Var1	6	0	6	10080	19455	14809	3089.53						Var1	6	0	6	12735	18090	15040.2	1902.02
Column statistics												90.00	-58.17	2.187	P > 0.05	ns
	Vehicle	Liraglutide	MS-275	Liraglutide+ MS-275	Chow diet							120.0	-45.5	1.711	P > 0.05	ns		Tukey's Multiple Comparison Test	Mean Diff.	q	Significant? P < 0.05?	Summary
Number of values	6	6	6	6	6													Vehicle vs Liraglutide	6726	3.344	No	ns							Shapiro-Wilk test													Shapiro-Wilk test :
												Normal Saline vs Liraglutide +MS-275						Vehicle vs MS-275	11590	5.761	Yes	**
Minimum	27210	14168	15173	10080	12735							Column Factor	Normal Saline	Liraglutide +MS-275	Difference	95% CI of diff.		Vehicle vs MS-275+Liraglutide	14510	7.214	Yes	***							W	0.972015												W	0.937739
25% Percentile	27351	15231	15544	12600	13163							0.0000	140.5	80	-60.5	-143.8 to 22.83		Vehicle vs Control	14280	7.099	Yes	***							p-value	0.905687												p-value	0.641043
Median	27657	19216	17074	15016	15233							15.00	276.7	187.7	-89	-172.3 to -5.674		Liraglutide vs MS-275	4863	2.417	No	ns							alpha	0.05												alpha	0.05
75% Percentile	30441	32897	19765	16750	16256							30.00	324.7	156.5	-168.2	-251.5 to -84.84		Liraglutide vs MS-275+Liraglutide	7786	3.871	No	ns
Maximum	38130	35288	22583	19455	18090							60.00	271.3	121	-150.3	-233.7 to -67.01		Liraglutide vs Control	7555	3.756	No	ns							Test interpretation:													Test interpretation:
												90.00	203	98.5	-104.5	-187.8 to -21.17		MS-275 vs MS-275+Liraglutide	2924	1.453	No	ns							H0: The sample follows a Normal distribution.													H0: The sample follows a Normal distribution.
Mean	29322	22595	17733	14809	15040							120.0	172.2	85.83	-86.33	-169.7 to -3.007		MS-275 vs Control	2693	1.339	No	ns					-5666 to 11050		Ha: The sample does not follow a Normal distribution.													Ha: The sample does not follow a Normal distribution.
Std. Deviation	4322	9066	2714	3090	1902													MS-275+Liraglutide vs Control	-231.2	0.1149	No	ns					-8590 to 8128		As the computed p-value is greater than the significance level alpha=0.05, one cannot reject the null hypothesis H0.													As the computed p-value is greater than the significance level alpha=0.05, one cannot reject the null hypothesis H0.
Std. Error	1764	3701	1108	1261	776.5							Column Factor	Difference	t	P value	Summary													The risk to reject the null hypothesis H0 while it is true is 90.57%.													The risk to reject the null hypothesis H0 while it is true is 64.10%.
												0.0000	-60.5	2.275	P > 0.05	ns
Lower 95% CI of mean	24786	13081	14885	11567	13044							15.00	-89	3.346	P<0.01	**
Upper 95% CI of mean	33857	32109	20581	18051	17036							30.00	-168.2	6.322	P<0.001	***
												60.00	-150.3	5.652	P<0.001	***
D'Agostino & Pearson omnibus normality test												90.00	-104.5	3.929	P<0.001	***
K2	N too small	N too small	N too small	N too small	N too small							120.0	-86.33	3.246	P<0.01	**
P value
Passed normality test (alpha=0.05)?												Normal Saline vs MS-275
P value summary												Column Factor	Normal Saline	MS-275	Difference	95% CI of diff.
												0.0000	140.5	96.5	-44	-127.3 to 39.33
Shapiro-Wilk normality test												15.00	276.7	221.3	-55.33	-138.7 to 27.99
W	N too small	N too small	N too small	N too small	N too small							30.00	324.7	212.2	-112.5	-195.8 to -29.17
P value												60.00	271.3	140.7	-130.7	-214.0 to -47.34
Passed normality test (alpha=0.05)?												90.00	203	111	-92	-175.3 to -8.674
P value summary												120.0	172.2	84.5	-87.67	-171.0 to -4.341
Sum	175929	135572	106397	88854	90241							Column Factor	Difference	t	P value	Summary
												0.0000	-44	1.654	P > 0.05	ns
												15.00	-55.33	2.08	P > 0.05	ns
Source data Figure 7C &Fig 7D: Intraperitoneal glucose tolerance test (IPGTT) in C57BL/6 male mice fed on chow diet, high-fat diet and receiving intraperitoneal injection of MS275 (5mg/kg body weight, every alternate day), subcutaneous injection of liraglutide (3nmol/kg body weight twice weekly) or combined MS-275 and liraglutide co-therapy.												30.00	-112.5	4.23	P<0.001	***
												60.00	-130.7	4.913	P<0.001	***
												90.00	-92	3.459	P<0.01	**
												120.0	-87.67	3.296	P<0.01	**
												Normal Saline vs chow diet control
												Column Factor	Normal Saline	chow diet control	Difference	95% CI of diff.
												0.0000	140.5	97	-43.5	-126.8 to 39.83
												15.00	276.7	198.5	-78.17	-161.5 to 5.159
												30.00	324.7	140.7	-184	-267.3 to -100.7
												60.00	271.3	122.7	-148.7	-232.0 to -65.34
												90.00	203	102.3	-100.7	-184.0 to -17.34
												120.0	172.2	94.67	-77.5	-160.8 to 5.826
												Column Factor	Difference	t	P value	Summary
												0.0000	-43.5	1.635	P > 0.05	ns
												15.00	-78.17	2.939	P < 0.05	*
												30.00	-184	6.918	P<0.001	***
												60.00	-148.7	5.589	P<0.001	***
												90.00	-100.7	3.785	P<0.01	**
												120.0	-77.5	2.914	P < 0.05	*
[truncated: 3 more columns]
