# Supplementary material for: MS-275, a class 1 histone deacetylase inhibitor augments glucagon-like peptide-1 receptor agonism to improve glycemic control and reduce obesity in diet-induced obese mice
Source: eLife. 2020 Dec 22;9:e52212. doi: 10.7554/eLife.52212 (PMC7755393; doi:10.7554/eLife.52212)
Supplement: Figure 8—source data 1. — Effect of 4-week treatment of DIO male mice with liraglutide (3 nmol/kg body weight twice weekly), MS-275 (5 mg/kg body weight, every alternate day), and a combined co-therapy of the two drugs on cumulative food intake and body weight gain. b. Source Data- Figure 8B, Impact of liraglutide and MS-275 monotherapy and the combined co-therapy of the two drugs on the progression of diet-induced obesity. [file elife-52212-fig8-data1.xlsx]

## Sheet: Body weight gain 8Aii 
Figure 8 Source Data 1									Figure 8 source data 1 : Source Data 8A(ii) Body weight gain
Body weight gain DIO
DIO	17th April	18th April	% gain	19th April	%gain	20th April	%gain	21st April	% gain	22nd April	% gain	23rd April	% gain	24th April	% gain	25th April	% gain	26th April	% gain	27th April	% gain	28th April	% gain	29th April	% gain	30th Aril	% gain	1st May	% gain	2nd May	% gain	3rd May	%gain a	4th May	% gain a	5th May	% gain a	6th May	% gain a	7th May	% gain	8th May	% gain	9th May	% gain	10th May	%gain	11th May	% gain
Normal Saline	29	30	3.7037	29	0	29	0	29	0	29	0	30	3.44828	30	3.44828	30	3.44828	30	3.44828	30	3.44828	30	3.44828	31	6.89655	32	10.3448	31	6.89655	31	6.89655	31	6.89655	32	10.3448	32	10.3448	32	10.3448	31	6.89655	32	10.3448	32	10.3448	32	10.3448	32	10.3448
	30	30	0	30	0	30	0	30	0	31	3.33333	31	3.33333	30	0	30	0	30	0	30	0	30	0	31	3.33333	32	6.66667	32	6.66667	32	6.66667	32	6.66667	32	6.66667	32	6.66667	33	10	33	10	34	13.3333	33	10	33	10	33	10
	35	34	-3.7037	34	-2.85714	34	-2.85714	35	0	35	0	34	-2.85714	34	-2.85714	35	0	34	-2.85714	34	-2.85714	34	-2.85714	35	0	35	0	35	0	35	0	35	0	35	0	36	2.85714	36	2.85714	36	2.85714	37	5.71429	38	8.57143	37	5.71429	37	5.71429
	31	31	0	30	-3.22581	30	-3.22581	31	0	31	0	32	3.22581	31	0	32	3.22581	33	6.45161	33	6.45161	32	3.22581	33	6.45161	33	6.45161	34	9.67742	34	9.67742	34	9.67742	34	9.67742	34	9.67742	34	9.67742	34	9.67742	35	12.9032	34	9.67742	34	9.67742	34	9.67742
	17th April	18th April	% gain	19th April	%gain	20th April	%gain	21st April	% gain	22nd April	% gain	23rd April	% gain	24th April	% gain	25th April	% gain	26th April	% gain	27th April	% gain	28th April	% gain	29th April	% gain	30th Aril	% gain	1st May	% gain	2nd May	% gain	3rd May	%gain	4th May	% gain	5th May	% gain	6th May	% gain	7th May	% gain	8th May	% gain	9th May	% gain	10th May	%gain	11th May	% gain
Lira	33	32	-3.7037	33	0	33	0	33	0	33	0	33	0	33	0	33	0	33	0	33	0	33	0	33	0	33	0	34	3.0303	34	3.0303	34	3.0303	33	0	33	0	33	0	33	0	34	3.0303	34	3.0303	34	3.0303	33	0
	35	34	-3.7037	35	0	36	2.85714	36	2.85714	35	0	36	2.85714	35	0	36	2.85714	36	2.85714	35	0	35	0	35	0	35	0	36	2.85714	36	2.85714	36	2.85714	36	2.85714	36	2.85714	35	0	36	2.85714	38	8.57143	38	8.57143	38	8.57143	37	5.71429
	40	38	-7.40741	37	-7.5	38	-5	40	0	38	-5	39	-2.5	39	-2.5	38	-5	38	-5	38	-5	39	-2.5	38	-5	38	-5	40	0	41	2.5	41	2.5	41	2.5	41	2.5	39	-2.5	41	2.5	42	5	42	5	41	2.5	40	0
	35	34	-3.7037	34	-2.85714	35	0	36	2.85714	35	0	36	2.85714	36	2.85714	37	5.71429	37	5.71429	37	5.71429	37	5.71429	37	5.71429	38	8.57143	38	8.57143	38	8.57143	39	11.4286	40	14.2857	39	11.4286	38	8.57143	38	8.57143	38	8.57143	38	8.57143	38	8.57143	38	8.57143
	17th April	18th April	% gain	19th April	% gain	20th April	%gain	21st April	% gain	22nd April	% gain	23rd April	% gain	24th April	% gain	25th April	% gain	26th April	% gain	27th April	% gain	28th April	% gain	29th April	% gain	30th Aril	% gain	1st May	% gain	2nd May	% gain a	3rd May	%gain a	4th May	%gain a	5th May	% gain a	6th May	% gain a	7th May	% gain a	8th May	% gain a	9th May	% gain a	10th May	%gain a	11th May	% gain a
MS-275+Lira	30	29	-3.7037	29	-3.33333	30	0	29	-3.33333	29	-3.33333	28	-6.66667	28	-6.66667	28	-6.66667	27	-10	27	-10	27	-10	27	-10	26	-13.3333	26	-13.3333	26	-13.3333	26	-13.3333	26	-13.3333	25	-16.6667	25	-16.6667	25	-16.6667	25	-16.6667	24	-20	24	-20	24	-20
	36	34	-7.40741	34	-5.55556	33	-8.33333	34	-5.55556	35	-2.77778	33	-8.33333	34	-5.55556	34	-5.55556	34	-5.55556	33	-8.33333	33	-8.33333	32	-11.1111	32	-11.1111	33	-8.33333	32	-11.1111	31	-13.8889	32	-11.1111	31	-13.8889	31	-13.8889	32	-11.1111	33	-8.33333	31	-13.8889	30	-16.6667	30	-16.6667
	36	34	-7.40741	34	-5.55556	33	-8.33333	33	-8.33333	33	-8.33333	32	-11.1111	32	-11.1111	32	-11.1111	33	-8.33333	32	-11.1111	32	-11.1111	32	-11.1111	32	-11.1111	31	-13.8889	31	-13.8889	31	-13.8889	31	-13.8889	30	-16.6667	30	-16.6667	30	-16.6667	30	-16.6667	30	-16.6667	29	-19.4444	29	-19.4444
	30	29	-3.7037	29	-3.33333	30	0	31	3.33333	28	-6.66667	28	-6.66667	29	-3.33333	30	0	30	0	30	0	30	0	30	0	29	-3.33333	29	-3.33333	28	-6.66667	28	-6.66667	28	-6.66667	28	-6.66667	27	-10	27	-10	26	-13.3333	26	-13.3333	26	-13.3333	25	-16.6667
	17th April	18th April	% gain	19th April	% gain	20th April	%gain	21st April	% gain	22nd April	% gain	23rd April	% gain	24th April	% gain	25th April	% gain	26th April	% gain	27th April	% gain	28th April	% gain	29th April	% gain	30th Aril	% gain	1st May	% gain	2nd May	% gain	3rd May	%gain	4th May	%gain	5th May	% gain	6th May	% gain	7th May	% gain	8th May	% gain	9th May	% gain	10th May	%gain	11th May	% gain
MS-275	34	34	0	34	0	33	-2.94118	32	-5.88235	32	-5.88235	31	-8.82353	31	-8.82353	31	-8.82353	31	-8.82353	31	-8.82353	30	-11.7647	30	-11.7647	29	-14.7059	29	-14.7059	29	-14.7059	30	-11.7647	30	-11.7647	29	-14.7059	30	-11.7647	30	-11.7647	31	-8.82353	30	-11.7647	30	-11.7647	31	-8.82353
	35	35	0	35	0	36	2.85714	36	2.85714	35	0	34	-2.85714	34	-2.85714	34	-2.85714	34	-2.85714	35	0	35	0	35	0	34	-2.85714	34	-2.85714	33	-5.71429	33	-5.71429	34	-2.85714	34	-2.85714	35	0	34	-2.85714	33	-5.71429	33	-5.71429	34	-2.85714	34	-2.85714
	34	34	0	34	0	34	0	33	-2.94118	34	0	33	-2.94118	33	-2.94118	32	-5.88235	31	-8.82353	30	-11.7647	29	-14.7059	30	-11.7647	30	-11.7647	30	-11.7647	30	-11.7647	31	-8.82353	31	-8.82353	30	-11.7647	31	-8.82353	32	-5.88235	33	-2.94118	33	-2.94118	32	-5.88235	32	-5.88235
	35	34	-3.7037	34	-2.85714	34	-2.85714	33	-5.71429	33	-5.71429	32	-8.57143	32	-8.57143	32	-8.57143	33	-5.71429	32	-8.57143	32	-8.57143	33	-5.71429	33	-5.71429	33	-5.71429	34	-2.85714	33	-5.71429	33	-5.71429	33	-5.71429	33	-5.71429	33	-5.71429	33	-5.71429	33	-5.71429	32	-8.57143	32	-8.57143
Figure 8 Source data 1 : Source Data 8A(ii) : Source Data Fig 8A: Effect of Four- week treatment of DIO male mice with Liraglutide (3nmol/kg body weight twice weekly), MS275 (5mg/kg body weight, every alternate day), and a combined co-therapy of the two drugs onbody weight gain (ii).
[truncated: 13 more columns]

## Sheet:  Food intake 8Ai
																																				Figure 8 Source Data 1							Figure 8 Source Data 1: Source Data 8A(i) Food intake
DIO	17th April, wt.	Food intake	18th April, wt.	Food intake (g)	Cumulative intake	19th April, wt.	Food intake (g)	Cumulative intake	20th April wt.	Food intake (g)	Cumulative intake	21st April,wt.	Food intake (g)	Cumulative intake	22nd April	Food intake (g)	Cumulative intake	23rd April	Food intake (g)	Cumulative intake	24th April	Food intake (g)	Cumulative intake	25th April	Food intake (g)	Cumulative intake	26th April	Food intake (g)	Cumulative intake	27th April	Food intake (g)	Cumulative intake	28th April	Food intake (g)	Cumulative intake	29th April	Food intake(g)	Cumulative intake	30th Aril	Food intake (g)	Cumulative intake	1st May	Food intake (g)	Cumulative intake	2nd May	Food intake(g)	Cumulative intake	3rd May	Food intake (g)
N. Saline(Vehicle)	29	5	30	4	9	29	3	12	29	3	15	29	3	18	29	4	22	30	3	25	30	3	28	30	3	31	30	3	34	30	3	37	30	5	42	31	4	46	32	4	50	31	3	53	31	3	56	31	4
	30	4	30	3	7	30	3	10	30	3	13	30	3	16	31	4	20	31	4	24	30	3	27	30	3	30	30	3	33	30	3	36	30	4	40	31	4	44	32	3	47	32	3	50	32	3	53	32	3
	35	4	34	3	7	34	3	10	34	4	14	35	3	17	35	3	20	34	3	23	34	5	28	35	3	31	34	3	34	34	3	37	34	4	41	35	5	46	35	3	49	35	3	52	35	3	55	35	3
	31	3	31	3	6	30	3	9	30	3	12	31	3	15	31	4	19	32	3	22	31	5	27	32	4	31	33	3	34	33	3	37	32	3	40	33	5	45	33	4	49	34	3	52	34	3	55	34	3
	17th April		18th April			19th April			20th April			21st April			22nd April			23rd April			24th April			25th April			26th April			27th April			28th April			29th April			30th Aril			1st May			2nd May			3rd May
Lira	33	2	32	3	5	33	3	8	33	3	11	33	3	14	33	3	17	33	2	19	33	3	22	33	2	24	33	2	26	33	2	28	33	3	31	33	2	33	33	3	36	34	3	39	34	3	42	34	3
	35	3	34	2	5	35	4	9	36	3	12	36	2	14	35	3	17	36	2	19	35	5	24	36	2	26	36	2	28	35	2	30	35	3	33	35	2	35	35	3	38	36	3	41	36	3	44	36	3
	40	5	38	4	9	37	4	13	38	4	17	40	4	21	38	4	25	39	2	27	39	3	30	38	3	33	38	2	35	38	3	38	39	2	40	38	2	42	38	4	46	40	4	50	41	3	53	41	4
	35	3	34	2	5	34	3	8	35	4	12	36	4	16	35	4	20	36	2	22	36	5	27	37	2	29	37	3	32	37	2	34	37	3	37	37	3	40	38	3	43	38	3	46	38	3	49	39	4
	17th April		18th April		0	19th April		0	20th April		0	21st April			22nd April			23rd April			24th April			25th April			26th April			27th April			28th April			29th April			30th Aril			1st May		0	2nd May			3rd May
MS-275+Lira	30	3	29	2	5	29	2	7	30	2	9	29	1	10	29	2	12	28	2	14	28	3	17	28	1	18	27	2	20	27	2	22	27	2	24	27	2	26	26	1	27	26	2	29	26	1	30	26	2
	36	3	34	2	5	34	2	7	33	2	9	34	3	12	35	3	15	33	3	18	34	3	21	34	1	22	34	2	24	33	2	26	33	1	27	32	2	29	32	2	31	33	2	33	32	2	35	31	1
	36	4	34	2	6	34	2	8	33	2	10	33	3	13	33	1	14	32	1	15	32	3	18	32	2	20	33	2	22	32	2	24	32	2	26	32	2	28	32	2	30	31	2	32	31	2	34	31	3
	30	3	29	2	5	29	2	7	30	2	9	31	2	11	28	1	12	28	3	15	29	3	18	30	2	20	30	2	22	30	2	24	30	2	26	30	2	28	29	2	30	29	2	32	28	1	33	28	2
	17th April		18th April		0	19th April		0	20th April		0	21st April			22nd April			23rd April			24th April			25th April			26th April			27th April			28th April			29th April			30th Aril			1st May		0	2nd May		0	3rd May
MS-275	34	3	34	3	6	34	3	9	33	2	11	32	1	12	32	1	13	31	2	15	31	2	17	31	1	18	31	2	20	31	2	22	30	1	23	30	2	25	29	3	28	29	1	29	29	2	31	30	2
	35	3	35	3	6	35	3	9	36	4	13	36	3	16	35	3	19	34	3	22	34	4	26	34	2	28	34	2	30	35	2	32	35	2	34	35	3	37	34	3	40	34	2	42	33	3	45	33	3
	34	4	34	3	7	34	3	10	34	3	13	33	3	16	34	4	20	33	2	22	33	2	24	32	1	25	31	3	28	30	3	31	29	3	34	30	2	36	30	3	39	30	1	40	30	3	43	31	3
	35	4	34	3	7	34	3	10	34	3	13	33	3	16	33	4	20	32	3	23	32	3	26	32	2	28	33	3	31	32	3	34	32	3	37	33	3	40	33	3	43	33	2	45	34	3	48	33	1
																																				Source Data Fig 8A: Effect of Four- week treatment of DIO male mice with Liraglutide (3nmol/kg body weight twice weekly), MS275 (5mg/kg body weight, every alternate day), and a combined co-therapy of the two drugs on cumulative food intake (i).
[truncated: 45 more columns]

## Sheet: Fig 8B ii
Figure 8 source data 1 :									Figure 8 source data 1 : source data Fig 8B(ii) Body weight gain 10-17 weeks
Source Data Figure 8B(ii): Body weight gain 10th week to 17th week
				Body weight 10th week to 17th week																Table Analyzed	Body weight gain 10th week to 17 th week						Table Analyzed	Body weight gain 10th week to 17 th week
		Group	Mice	0 week	week 1	% gain	week2	%gain	week3	%gain	week 4	% gain	week 5	% gain	week 6	% gain	week 7	% gain		Two-way ANOVA							One-way analysis of variance
		Normal saline	NS1	34	35	2.94118	35	2.94118	35	2.94118	37	8.82353	38	11.7647	39	14.7059	38	11.7647									P value	< 0.0001
			NS6	28	29	3.57143	28	0	30	7.14286	32	14.2857	32	14.2857	33	17.8571	32	14.2857		Source of Variation	% of total variation	P value					P value summary	***
			NS5	28	29	3.57143	30	7.14286	31	10.7143	32	14.2857	32	14.2857	34	21.4286	34	21.4286		Interaction	14.07	< 0.0001					Are means signif. different? (P < 0.05)	Yes
			NS3	26	27	3.84615	29	11.5385	30	15.3846	31	19.2308	31	19.2308	32	23.0769	33	26.9231		Column Factor	38.39	< 0.0001					Number of groups	4
			NS4	32	34	6.25	36	12.5	37	15.625	35	9.375	37	15.625	38	18.75	37	15.625		time in days	16.39	< 0.0001					F	11.77
			NS2	34	36	5.88235	37	8.82353	37	8.82353	37	8.82353	37	8.82353	40	17.6471	42	23.5294									R squared	0.5576
		Liraglutide	L5	27	27	0	27	0	27	0	29	7.40741	29	7.40741	28	3.7037	29	7.40741		Source of Variation	P value summary	Significant?
			L2	31	33	6.45161	34	9.67742	34	9.67742	36	16.129	36	16.129	34	9.67742	35	12.9032		Interaction	***	Yes					Bartlett's test for equal variances
			L6	25	26	4	27	8	28	12	29	16	29	16	26	4	28	12		Column Factor	***	Yes					Bartlett's statistic (corrected)	13.49
			L3	31	33	6.45161	35	12.9032	34	9.67742	36	16.129	36	16.129	36	16.129	34	9.67742		time in days	***	Yes					P value	0.0037
			L4	29	29	0	31	6.89655	31	6.89655	31	6.89655	31	6.89655	32	10.3448	30	3.44828									P value summary	**
			L1	32	31	-3.125	35	9.375	36	12.5	37	15.625	34	6.25	35	9.375	33	3.125		Source of Variation	Df	Sum-of-squares	Mean square	F			Do the variances differ signif. (P < 0.05)	Yes
		Liraglutide+MS-275	LMS-3	28	27	-3.57143	27	-3.57143	28	0	29	3.57143	28	0	29	3.57143	29	3.57143		Interaction	21	1555	74.05	3.44
			LMS-6	27	27	0	27	0	28	3.7037	24	-11.1111	25	-7.40741	24	-11.1111	26	-3.7037		Column Factor	3	4244	1415	65.73			ANOVA Table	SS	df	MS
			LMS-4	25	24	-4	24	-4	22	-12	22	-12	22	-12	21	-16	24	-4		time in days	7	1812	258.8	12.03			Treatment (between columns)	707.4	3	235.8
			LMS-1	26	25	-3.84615	24	-7.69231	23	-11.5385	24	-7.69231	24	-7.69231	25	-3.84615	26	0		Residual	160	3444	21.52				Residual (within columns)	561.1	28	20.04
			LMS-5	31	29	-6.45161	33	6.45161	32	3.22581	31	0	33	6.45161	33	6.45161	32	3.22581									Total	1269	31
			LMS-2	31	33	6.45161	31	0	30	-3.22581	32	3.22581	33	6.45161	33	6.45161	30	-3.22581		Number of missing values	0
		MS-275	MS-3	33	33	0	33	0	32	-3.0303	32	-3.0303	33	0	33	0	35	6.06061									Tukey's Multiple Comparison Test	Mean Diff.	q	Significant? P < 0.05?	Summary	95% CI of diff
			MS-2	30	31	3.33333	31	3.33333	31	3.33333	32	6.66667	32	6.66667	33	10	35	16.6667		Bonferroni posttests							Normal Saline vs Liraglutide	3.233	2.043	No	ns	-2.882 to 9.349
			MS-6	27	28	3.7037	27	0	29	7.40741	29	7.40741	30	11.1111	30	11.1111	30	11.1111									Normal Saline vs Liraglutide +MS-275	12.76	8.061	Yes	***	6.643 to 18.87
			MS-1	33	33	0	33	0	36	9.09091	36	9.09091	37	12.1212	38	15.1515	37	12.1212		Normal Saline vs Liraglutide							Normal Saline vs MS-275	6.099	3.854	No	ns	-0.01580 to 12.21
			MS-5	29	29	0	29	0	29	0	30	3.44828	30	3.44828	31	6.89655	33	13.7931		time in days	Normal Saline	Liraglutide	Difference	95% CI of diff.			Liraglutide vs Liraglutide +MS-275	9.525	6.018	Yes	**	3.409 to 15.64
			MS-4	28	30	7.14286	29	3.57143	29	3.57143	29	3.57143	29	3.57143	30	7.14286	30	7.14286		0.0000	0	0	0	-8.947 to 8.947			Liraglutide vs MS-275	2.866	1.811	No	ns	-3.249 to 8.981
																				7.000	4.344	2.296	-2.047	-10.99 to 6.899			Liraglutide +MS-275 vs MS-275	-6.659	4.207	Yes	*	-12.77 to -0.5433
		Figure 8 source data 1 : Source Data Fig 8B(ii): The impact of Liraglutide and MS-275 monotherapy and the combined co-therapy of the two drugs on (ii) Body weight gain 10-17 weeks																		14.00	7.158	7.809	0.651	-8.296 to 9.598
																				21.00	10.11	8.459	-1.647	-10.59 to 7.300
																				28.00	12.47	13.03	0.5605	-8.386 to 9.507
																				35.00	14	11.49	-2.512	-11.46 to 6.434
																				42.00	18.91	8.872	-10.04	-18.99 to -1.093
																				49.00	18.93	8.094	-10.83	-19.78 to -1.886
																				time in days	Difference	t	P value	Summary
																				0.0000	0	0	P > 0.05	ns
																				7.000	-2.047	0.7644	P > 0.05	ns
																				14.00	0.651	0.2431	P > 0.05	ns
																				21.00	-1.647	0.6148	P > 0.05	ns
																				28.00	0.5605	0.2092	P > 0.05	ns
																				35.00	-2.512	0.938	P > 0.05	ns
																				42.00	-10.04	3.748	P<0.01	**
																				49.00	-10.83	4.044	P<0.001	***
																				Normal Saline vs Liraglutide +MS-275
																				time in days	Normal Saline	Liraglutide +MS-275	Difference	95% CI of diff.
																				0.0000	0	0	0	-8.947 to 8.947
																				7.000	4.344	-1.903	-6.247	-15.19 to 2.700
																				14.00	7.158	-1.469	-8.626	-17.57 to 0.3203
																				21.00	10.11	-3.306	-13.41	-22.36 to -4.464
																				28.00	12.47	-4.001	-16.47	-25.42 to -7.525
																				35.00	14	-2.366	-16.37	-25.32 to -7.422
																				42.00	18.91	-2.414	-21.32	-30.27 to -12.38
																				49.00	18.93	-0.6887	-19.61	-28.56 to -10.67
																				time in days	Difference	t	P value	Summary
																				0.0000	0	0	P > 0.05	ns
																				7.000	-6.247	2.332	P > 0.05	ns
																				14.00	-8.626	3.221	P < 0.05	*
																				21.00	-13.41	5.007	P<0.001	***
																				28.00	-16.47	6.15	P<0.001	***
																				35.00	-16.37	6.111	P<0.001	***
																				42.00	-21.32	7.962	P<0.001	***
																				49.00	-19.61	7.323	P<0.001	***
																				Normal Saline vs MS-275
																				time in days	Normal Saline	MS-275	Difference	95% CI of diff.
																				0.0000	0	0	0	-8.947 to 8.947
																				7.000	4.344	2.363	-1.98	-10.93 to 6.966
																				14.00	7.158	1.151	-6.007	-14.95 to 2.940
																				21.00	10.11	3.395	-6.71	-15.66 to 2.237
																				28.00	12.47	4.526	-7.945	-16.89 to 1.002
																				35.00	14	6.153	-7.849	-16.80 to 1.097
																				42.00	18.91	8.384	-10.53	-19.47 to -1.581
																				49.00	18.93	11.15	-7.777	-16.72 to 1.170
																				time in days	Difference	t	P value	Summary
																				0.0000	0	0	P > 0.05	ns
																				7.000	-1.98	0.7394	P > 0.05	ns
																				14.00	-6.007	2.243	P > 0.05	ns
																				21.00	-6.71	2.505	P > 0.05	ns
																				28.00	-7.945	2.966	P < 0.05	*
																				35.00	-7.849	2.931	P < 0.05	*
																				42.00	-10.53	3.93	P<0.01	**
																				49.00	-7.777	2.903	P < 0.05	*
																				Liraglutide vs Liraglutide +MS-275
																				time in days	Liraglutide	Liraglutide +MS-275	Difference	95% CI of diff.
																				0.0000	0	0	0	-8.947 to 8.947
																				7.000	2.296	-1.903	-4.199	-13.15 to 4.747
																				14.00	7.809	-1.469	-9.277	-18.22 to -0.3307
																				21.00	8.459	-3.306	-11.76	-20.71 to -2.818
																				28.00	13.03	-4.001	-17.03	-25.98 to -8.085
																				35.00	11.49	-2.366	-13.86	-22.80 to -4.910
																				42.00	8.872	-2.414	-11.29	-20.23 to -2.339
																				49.00	8.094	-0.6887	-8.782	-17.73 to 0.1644
																				time in days	Difference	t	P value	Summary
																				0.0000	0	0	P > 0.05	ns
																				7.000	-4.199	1.568	P > 0.05	ns
																				14.00	-9.277	3.464	P<0.01	**
																				21.00	-11.76	4.392	P<0.001	***
																				28.00	-17.03	6.359	P<0.001	***
																				35.00	-13.86	5.173	P<0.001	***
																				42.00	-11.29	4.213	P<0.001	***
																				49.00	-8.782	3.279	P < 0.05	*
																				Liraglutide vs MS-275
																				time in days	Liraglutide	MS-275	Difference	95% CI of diff.
																				0.0000	0	0	0	-8.947 to 8.947
																				7.000	2.296	2.363	0.06694	-8.880 to 9.014
																				14.00	7.809	1.151	-6.658	-15.60 to 2.289
																				21.00	8.459	3.395	-5.063	-14.01 to 3.884
																				28.00	13.03	4.526	-8.505	-17.45 to 0.4413
																				35.00	11.49	6.153	-5.337	-14.28 to 3.610
																				42.00	8.872	8.384	-0.488	-9.435 to 8.459
																				49.00	8.094	11.15	3.056	-5.891 to 12.00
																				time in days	Difference	t	P value	Summary
																				0.0000	0	0	P > 0.05	ns
																				7.000	0.06694	0.02499	P > 0.05	ns
																				14.00	-6.658	2.486	P > 0.05	ns
																				21.00	-5.063	1.89	P > 0.05	ns
																				28.00	-8.505	3.175	P < 0.05	*
																				35.00	-5.337	1.993	P > 0.05	ns
																				42.00	-0.488	0.1822	P > 0.05	ns
																				49.00	3.056	1.141	P > 0.05	ns
																				Liraglutide +MS-275 vs MS-275
																				time in days	Liraglutide +MS-275	MS-275	Difference	95% CI of diff.
																				0.0000	0	0	0	-8.947 to 8.947
																				7.000	-1.903	2.363	4.266	-4.680 to 13.21
																				14.00	-1.469	1.151	2.619	-6.327 to 11.57
																				21.00	-3.306	3.395	6.701	-2.245 to 15.65
																				28.00	-4.001	4.526	8.527	-0.4199 to 17.47
																				35.00	-2.366	6.153	8.519	-0.4275 to 17.47
																				42.00	-2.414	8.384	10.8	1.851 to 19.74
																				49.00	-0.6887	11.15	11.84	2.891 to 20.78
																				time in days	Difference	t	P value	Summary
																				0.0000	0	0	P > 0.05	ns
																				7.000	4.266	1.593	P > 0.05	ns
																				14.00	2.619	0.978	P > 0.05	ns
																				21.00	6.701	2.502	P > 0.05	ns
																				28.00	8.527	3.183	P < 0.05	*
																				35.00	8.519	3.181	P < 0.05	*
																				42.00	10.8	4.031	P<0.001	***
																				49.00	11.84	4.42	P<0.001	***

## Sheet: Fig 8Biii
Figure 8 source data 1										Figure 8 source data 1 : source data Fig 8B(iii) drug holiday
Source Data Figure 8Bii (drug holiday)
													Table Analyzed	weight gain drug holliday
Body weight gain drug holiday					Table Analyzed	weight gain drug holliday
													Kruskal-Wallis test
Wt gain (Normal saline)					One-way analysis of variance								P value	0.0013
17th week	19th week	wt gain			P value	0.0003							Exact or approximate P value?	Gaussian Approximation
42	43	2.38095	NS-2		P value summary	***							P value summary	**
38	41	7.89474	NS-1		Are means signif. different? (P < 0.05)	Yes							Do the medians vary signif. (P < 0.05)	Yes
33	35	6.06061	NS-3		Number of groups	4							Number of groups	4
37	38	2.7027	NS-4		F	10.36							Kruskal-Wallis statistic	15.69
34	37	8.82353	NS-5
32	35	9.375	NS-6										Dunn's Multiple Comparison Test	Difference in rank sum	Significant? P < 0.05?	Summary
Body weight gain drug holiday					Bartlett's test for equal variances								Vehicle vs Liraglutide	-8.417	No	ns
					Bartlett's statistic (corrected)	4.499							Vehicle vs MS-275	-1.167	No	ns
Wt gain(Liraglutide)					P value	0.2124							Vehicle vs Liraglutide +MS-275	-14.08	Yes	**
17th week	19th week	wt gain			P value summary	ns							Liraglutide vs MS-275	7.25	No	ns
33	36	9.09091	L1		Do the variances differ signif. (P < 0.05)	No							Liraglutide vs Liraglutide +MS-275	-5.667	No	ns
35	39	11.4286	L2										MS-275 vs Liraglutide +MS-275	-12.92	Yes	**
34	38	11.7647	L3		ANOVA Table	SS	df	MS
30	34	13.3333	L4		Treatment (between columns)	287.1	3	95.68
29	32	10.3448	L5		Residual (within columns)	184.7	20	9.235
28	30	7.14286	L6		Total	471.8	23
Body weight gain drug holiday
					Tukey's Multiple Comparison Test	Mean Diff.	q	Significant? P < 0.05?	Summary	95% CI of diff
Wt gain(MS-275 + Liraglutide)					Normal Saline vs Liraglutide	-4.311	3.475	No	ns	-9.222 to 0.5992
17th week	19th week	wt gain			Normal Saline vs MS-275	-1.34	1.08	No	ns	-6.250 to 3.571
32	36	12.5	LMS-5		Normal Saline vs Liraglutide +MS-275	-9.011	7.264	Yes	***	-13.92 to -4.101
29	32	10.3448	LMS-3		Liraglutide vs MS-275	2.972	2.395	No	ns	-1.939 to 7.882
24	28	16.6667	LMS-4		Liraglutide vs Liraglutide +MS-275	-4.7	3.789	No	ns	-9.611 to 0.2103
30	34	13.3333	LMS-2		MS-275 vs Liraglutide +MS-275	-7.672	6.184	Yes	**	-12.58 to -2.761
26	32	23.0769	LMS-6
26	30	15.3846	LMS-1
Body weight gain drug holiday
Wt gain (MS-275)
17th week	19th week	wt gain
37	39	5.40541	MS-1
35	38	8.57143	MS-3
35	38	8.57143	MS-2
30	32	6.66667	MS-6
33	35	6.06061	MS-5
30	33	10	MS-4
Figure 8 Source data 1: Source Data Fig 8B (iii): The impact of Liraglutide and MS-275 monotherapy and the combined co-therapy of the two drugs on weight gain during holiday

## Sheet: Fig 8B(iv)
Figure 8 Source Data1: Source Data Figure 8B(iv): Body weight gain week 19- week 23rd
	Body weight gain (19-23week)
													Table Analyzed	Data 1
			0 week	week 1	% gain	week2	%gain	week3	%gain	week 4	% gain
	Normal Saline	NS-2	43	44	2.32558	43	0	44	2.32558	44	2.32558		Two-way RM ANOVA	Matching by cols
		NS-1	41	42	2.43902	42	2.43902	42	2.43902	43	4.87805
		NS-3	35	35	0	37	5.71429	36	2.85714	37	5.71429		Source of Variation	% of total variation	P value
		NS-4	38	39	2.63158	38	0	40	5.26316	39	2.63158		Interaction	1.37	0.4591
		NS-5	37	35	-5.40541	38	2.7027	39	5.40541	38	2.7027		Time	3.47	0.0002
		NS-6	35	34	-2.85714	36	2.85714	36	2.85714	36	2.85714		Column Factor	66.29	< 0.0001
	Lira	L1	36	37	2.77778	37	2.77778	36	0	36	0		Subjects (matching)	19.6233	< 0.0001
		L2	39	39	0	39	0	40	2.5641	42	7.69231
		L3	38	38	0	38	0	40	5.26316	41	7.89474		Source of Variation	P value summary	Significant?
		L4	34	35	2.94118	34	0	33	-2.94118	34	0		Interaction	ns	No
		L5	32	32	0	32	0	33	3.125	33	3.125		Time	***	Yes
		L6	30	31	3.33333	31	3.33333	32	6.66667	31	3.33333		Column Factor	***	Yes
	MS-275+Lira	LMS-2	34	34	0	32	-5.88235	33	-2.94118	31	-8.82353		Subjects (matching)	***	Yes
		LMS-3	32	31	-3.125	30	-6.25	32	0	31	-3.125
		LMS-4	28	24	-14.2857	24	-14.2857	25	-10.7143	25	-10.7143		Source of Variation	Df	Sum-of-squares	Mean square	F
		LMS-5	36	32	-11.1111	31	-13.8889	32	-11.1111	32	-11.1111		Interaction	9	55.26	6.14	0.9885
		LMS-1	30	24	-20	24	-20	26	-13.3333	27	-10		Time	3	140.1	46.69	7.517
		LMS-6	32	26	-18.75	26	-18.75	28	-12.5	28	-12.5		Column Factor	3	2673	890.8	22.52
	MS-275	MS-1	39	38	-2.5641	38	-2.5641	38	-2.5641	38	-2.5641		Subjects (matching)	20	791.2	39.56	6.368
		MS-3	38	38	0	37	-2.63158	38	0	39	2.63158		Residual	60	372.7	6.212
		MS-2	38	38	0	38	0	38	0	37	-2.63158
		MS-6	32	30	-6.25	31	-3.125	31	-3.125	33	3.125		Number of missing values	0
		MS-5	35	35	0	37	5.71429	37	5.71429	37	5.71429
		MS-4	33	32	-3.0303	33	0	33	0	34	3.0303		Bonferroni posttests
	Figure 8 Source data 1: The impact of Liraglutide and MS-275 monotherapy and the combined co-therapy of the two drugs on body weight gain (19-23rd weeks)												Vehicle vs Liraglutide
													Column Factor	Vehicle	Liraglutide	Difference	95% CI of diff.
													7th day	-0.1444	1.509	1.653	-5.354 to 8.660
													14th day	2.286	1.019	-1.267	-8.274 to 5.740
													21st day	3.525	2.446	-1.078	-8.085 to 5.929
													28th day	3.518	3.674	0.156	-6.851 to 7.163
													Column Factor	Difference	t	P value	Summary
													7th day	1.653	0.7507	P > 0.05	ns
													14th day	-1.267	0.5754	P > 0.05	ns
													21st day	-1.078	0.4897	P > 0.05	ns
													28th day	0.156	0.07084	P > 0.05	ns
													Vehicle vs MS-275
													Column Factor	Vehicle	MS-275	Difference	95% CI of diff.
													7th day	-0.1444	-1.974	-1.83	-8.837 to 5.177
													14th day	2.286	-0.4344	-2.72	-9.727 to 4.287
													21st day	3.525	0.004197	-3.52	-10.53 to 3.487
													28th day	3.518	1.551	-1.967	-8.974 to 5.040
													Column Factor	Difference	t	P value	Summary
													7th day	-1.83	0.8309	P > 0.05	ns
													14th day	-2.72	1.235	P > 0.05	ns
													21st day	-3.52	1.599	P > 0.05	ns
													28th day	-1.967	0.8934	P > 0.05	ns
													Vehicle vs Liraglutide +MS-275
													Column Factor	Vehicle	Liraglutide +MS-275	Difference	95% CI of diff.
													7th day	-0.1444	-11.21	-11.07	-18.07 to -4.061
													14th day	2.286	-13.18	-15.46	-22.47 to -8.455
													21st day	3.525	-8.433	-11.96	-18.96 to -4.951
													28th day	3.518	-9.379	-12.9	-19.90 to -5.890
													Column Factor	Difference	t	P value	Summary
													7th day	-11.07	5.026	P<0.001	***
													14th day	-15.46	7.021	P<0.001	***
													21st day	-11.96	5.43	P<0.001	***
													28th day	-12.9	5.857	P<0.001	***
													Liraglutide vs MS-275
													Column Factor	Liraglutide	MS-275	Difference	95% CI of diff.
													7th day	1.509	-1.974	-3.483	-10.49 to 3.524
													14th day	1.019	-0.4344	-1.453	-8.460 to 5.554
													21st day	2.446	0.004197	-2.442	-9.449 to 4.565
													28th day	3.674	1.551	-2.123	-9.130 to 4.884
													Column Factor	Difference	t	P value	Summary
													7th day	-3.483	1.582	P > 0.05	ns
													14th day	-1.453	0.6598	P > 0.05	ns
													21st day	-2.442	1.109	P > 0.05	ns
													28th day	-2.123	0.9642	P > 0.05	ns
													Liraglutide vs Liraglutide +MS-275
													Column Factor	Liraglutide	Liraglutide +MS-275	Difference	95% CI of diff.
													7th day	1.509	-11.21	-12.72	-19.73 to -5.714
													14th day	1.019	-13.18	-14.19	-21.20 to -7.188
													21st day	2.446	-8.433	-10.88	-17.89 to -3.873
													28th day	3.674	-9.379	-13.05	-20.06 to -6.046
													Column Factor	Difference	t	P value	Summary
													7th day	-12.72	5.777	P<0.001	***
													14th day	-14.19	6.446	P<0.001	***
													21st day	-10.88	4.94	P<0.001	***
													28th day	-13.05	5.928	P<0.001	***
													MS-275 vs Liraglutide +MS-275
													Column Factor	MS-275	Liraglutide +MS-275	Difference	95% CI of diff.
													7th day	-1.974	-11.21	-9.238	-16.24 to -2.231
													14th day	-0.4344	-13.18	-12.74	-19.75 to -5.735
													21st day	0.004197	-8.433	-8.438	-15.44 to -1.431
													28th day	1.551	-9.379	-10.93	-17.94 to -3.923
													Column Factor	Difference	t	P value	Summary
													7th day	-9.238	4.195	P<0.001	***
													14th day	-12.74	5.786	P<0.001	***
													21st day	-8.438	3.832	P<0.01	**
													28th day	-10.93	4.963	P<0.001	***
