# Supplementary material for: MS-275, a class 1 histone deacetylase inhibitor augments glucagon-like peptide-1 receptor agonism to improve glycemic control and reduce obesity in diet-induced obese mice
Source: eLife. 2020 Dec 22;9:e52212. doi: 10.7554/eLife.52212 (PMC7755393; doi:10.7554/eLife.52212)
Supplement: Figure 9—source data 1. — Effect of MS-275, or liraglutide monotherapy and combined therapy on white adipose tissue mass; (i) epididymal, (ii) retroperitoneal, and (iii) mesenteric WAT in DIO mice b. Source data Figure 9B: Effect of MS-275, or liraglutide monotherapy and combined therapy on relative mRNA expression of PPARα (i), CIDEA (ii), PGC1α (iii), and UCP1 (iv) in retroperitoneal WAT of HFD mice that were quantified using the 2-ΔΔCT method. [file elife-52212-fig9-data1.xlsx]

## Sheet: SDFig 9A
Figure 9 Source Data 1 : Source Data Fig 9A: Effect of MS275, or liraglutide monotherapy and combined therapy on white adipose tissue mass; (i) epididymal (EP), (ii) retroperitoneal (RP) and (iii) mesenteric WAT (MS) in DIO mice															Fig 9A(i): Epididymal Fat
Vehicle Control	Body weight	Adipose EP	Normalized EP	Av EP	Fold	Adipose RP	Normalized RP	Av RP	Fold	Adipose MS	Normalized MS	Average MS	Fold			Vehicle	Liraglutide	MS-275	Liraglutide+MS-275				Fig 9A(i): Shapiro -Wilk analysis: Epididymal Fat
NS1	43	1.05	2.44186	3.58855	0.680458	0.294	0.683721	0.938877	0.728233	0.338298	0.786739	1.05384	0.746544		Number of values	6	6	6	6
NS2	42	1.55	3.69048		1.0284	0.5	1.19048		1.26798	0.419512	0.998839		0.947807									Vehicle																Liraglutide
NS3	37	1.52	4.10811		1.14478	0.45	1.21622		1.29539	0.192857	0.521236		0.494605		Minimum	0.5302	0.2449	0.3501	0.1414				Summary statistics:																Summary statistics:
NS4	39	1.42	3.64103		1.01462	0.47	1.20513		1.28359	0.361905	0.927961		0.880551		25% Percentile	0.6429	0.3979	0.3982	0.1493
NS5	38	0.723	1.90263		0.530194	0.16	0.421053		0.448464	0.5	1.31579		1.24856		Median	1.022	0.5324	0.4446	0.2734				Variable	Observations	Obs. with missing data	Obs. without missing data	Minimum	Maximum	Mean	Std. deviation									Variable	Observations	Obs. with missing data	Obs. without missing data	Minimum	Maximum	Mean	Std. deviation
NS6	36	2.069	5.74722		1.60154	0.33	0.916667		0.976344	0.638095	1.77249		1.68193		75% Percentile	1.259	0.5876	0.5154	0.5645				Var1	6	0	6	0.530195	1.60154	1	0.375942									Var1	6	0	6	0.244886	0.702397	0.501727	0.150469
Liraglutide															Maximum	1.602	0.7024	0.5655	0.7054
L1	36	0.58	1.61111		0.448958	0.294	0.816667		0.869834	0.159	0.441667		0.419102
L2	42	0.828	1.97143		0.549366	0.5	1.19048		1.26798	0.172	0.409524		0.388601		10% Percentile	0.5302	0.2449	0.3501	0.1414				Shapiro-Wilk test																Shapiro-Wilk test
L3	41	0.777	1.89512		0.528102	0.45	1.09756		1.16901	0.081	0.197561		0.187467		90% Percentile	1.602	0.7024	0.5655	0.7054
L4	34	0.857	2.52059		0.702397	0.47	1.38235		1.47235	0.152	0.447059		0.424218										W	0.952455															W	0.922201
L5	33	0.29	0.878788		0.244886	0.16	0.484848		0.516413	0.185	0.560606		0.531964		Mean	1	0.5017	0.453	0.3438				p-value	0.76011															p-value	0.521353
L6	31	0.597	1.92581		0.536652	0.33	1.06452		1.13382	0.268	0.864516		0.820347		Std. Deviation	0.3759	0.1505	0.07584	0.2295				alpha	0.05															alpha	0.05
MS-275															Std. Error	0.1535	0.06143	0.03096	0.09371
MS-1	38	0.68	1.78947		0.498661	0.263	0.692105		0.737163	0.166	0.436842		0.414523										Test interpretation:																Test interpretation:
MS-2	37	0.63	1.7027		0.474482	0.15	0.405405		0.431798	0.22	0.594595		0.564216		Lower 95% CI of mean	0.6055	0.3438	0.3734	0.1029				H0: The sample follows a Normal distribution.																H0: The sample follows a Normal distribution.
MS-3	39	0.49	1.25641		0.350116	0.118	0.302564		0.322262	0.087	0.223077		0.21168		Upper 95% CI of mean	1.395	0.6596	0.5325	0.5847				Ha: The sample does not follow a Normal distribution.																Ha: The sample does not follow a Normal distribution.
MS-4	34	0.506	1.48824		0.414717	0.21	0.617647		0.657857	0.13	0.382353		0.362818										As the computed p-value is greater than the significance level alpha=0.05, one cannot reject the null hypothesis H0.																As the computed p-value is greater than the significance level alpha=0.05, one cannot reject the null hypothesis H0.
MS-5	37	0.55	1.48649		0.41423	0.11	0.297297		0.316652	0.13	0.351351		0.3334		KS normality test								The risk to reject the null hypothesis H0 while it is true is 76.01%.																The risk to reject the null hypothesis H0 while it is true is 52.14%.
MS-6	34	0.69	2.02941		0.565524	0.268	0.788235		0.839551	0.1	0.294118		0.279091		KS distance	0.1834	0.2362	0.1929	0.2524			MS-275	Summary statistics:															Liraglutide +MS-275	Summary statistics:
Liraglutide+MS-275															P value	> 0.10	> 0.10	> 0.10	> 0.10
LMS-1	27	0.137	0.507407		0.141396	0.024	0.0888889		0.0946758	0	0		0		Passed normality test (alpha=0.05)?	Yes	Yes	Yes	Yes				Variable	Observations	Obs. with missing data	Obs. without missing data	Minimum	Maximum	Mean	Std. deviation									Variable	Observations	Obs. with missing data	Obs. without missing data	Minimum	Maximum	Mean	Std. deviation
LMS-2	31	0.169	0.545161		0.151917	0.025	0.0806452		0.0858954	0.05	0.16129		0.15305		P value summary	ns	ns	ns	ns				Var1	6	0	6	0.350116	0.565523	0.452955	0.0758443									Var1	6	0	6	0.141396	0.705368	0.343838	0.229542
LMS-3	31	0.4	1.29032		0.359566	0.132	0.425806		0.453528	0.052	0.167742		0.159172
LMS-4	25	0.168	0.672		0.187262	0.045	0.18		0.191718	0	0		0		D'Agostino & Pearson omnibus normality test
LMS-5	32	0.81	2.53125		0.705368	0.2	0.625		0.665689	0.103	0.321875		0.30543		K2	N too small	N too small	N too small	N too small				Shapiro-Wilk test (Var1):																Shapiro-Wilk test (Var1):
LMS-6	28	0.52	1.85714		0.517518	0.124	0.442857		0.471688	0	0		0		P value
															Passed normality test (alpha=0.05)?								W	0.975193															W	0.876205
Figure 9 Source Data 1 : Source Data Fig 9A: Effect of MS275, or liraglutide monotherapy and combined therapy on white adipose tissue mass; (i) epididymal (EP), (ii) retroperitoneal (RP) and (iii) mesenteric WAT (MS) in DIO mice															P value summary								p-value	0.925322															p-value	0.252077
																							alpha	0.05															alpha	0.05
															Shapiro-Wilk normality test
															W	N too small	N too small	N too small	N too small				Test interpretation:																Test interpretation:
															P value								H0: The sample follows a Normal distribution.																H0: The sample follows a Normal distribution.
															Passed normality test (alpha=0.05)?								Ha: The sample does not follow a Normal distribution.																Ha: The sample does not follow a Normal distribution.
															P value summary								As the computed p-value is greater than the significance level alpha=0.05, one cannot reject the null hypothesis H0.																As the computed p-value is greater than the significance level alpha=0.05, one cannot reject the null hypothesis H0.
																							The risk to reject the null hypothesis H0 while it is true is 92.53%.																The risk to reject the null hypothesis H0 while it is true is 25.21%.
															Sum	6	3.01	2.718	2.063
																						Table Analyzed	Data 1
																						One-way analysis of variance
																						P value	0.0005
																						P value summary	***
																						Are means signif. different? (P < 0.05)	Yes
																						Number of groups	4
																						F	9.148
																						R squared	0.5784
																						Bartlett's test for equal variances
																						Bartlett's statistic (corrected)	10.56
																						P value	0.0144
																						P value summary	*
																						Do the variances differ signif. (P < 0.05)	Yes
																						ANOVA Table	SS	df	MS
																						Treatment (between columns)	1.526	3	0.5086
																						Residual (within columns)	1.112	20	0.0556
																						Total	2.638	23
																						Tukey's Multiple Comparison Test	Mean Diff.	q	Significant? P < 0.05?	Summary	95% CI of diff
																						Vehicle vs Liraglutide	0.4983	5.176	Yes	**	0.1172 to 0.8793
																						Vehicle vs MS-275	0.547	5.683	Yes	**	0.1660 to 0.9281
																						Vehicle vs Liraglutide+MS-275	0.6562	6.816	Yes	***	0.2751 to 1.037
																						Liraglutide vs MS-275	0.04877	0.5066	No	ns	-0.3323 to 0.4298
																						Liraglutide vs Liraglutide+MS-275	0.1579	1.64	No	ns	-0.2231 to 0.5389
																						MS-275 vs Liraglutide+MS-275	0.1091	1.133	No	ns	-0.2719 to 0.4901
															Fig 9A(ii) Mesenteric Fat
																Vehicle	Liraglutide	MS-275	Liraglutide+MS-275				9A(ii): Shapiro -Wilk analysis: Mesenteric Fat
															Number of values	6	6	6	6
																						Vehicle														Liraglutide
															Minimum	0.4946	0.1875	0.2117	0				Summary statistics:														Summary statistics:
															25% Percentile	0.6836	0.3383	0.2622	0
															Median	0.9142	0.4217	0.3481	0.07652				Variable	Observations	Obs. with missing data	Obs. without missing data	Minimum	Maximum	Mean	Std. deviation							Variable	Observations	Obs. with missing data	Obs. without missing data	Minimum	Maximum	Mean	Std. deviation
															75% Percentile	1.357	0.6041	0.4519	0.1957				Var1	6	0	6	0.494605	1.68193	1	0.415564							Var1	6	0	6	0.187467	0.820347	0.46195	0.208485
															Maximum	1.682	0.8203	0.5642	0.3054
															10% Percentile	0.4946	0.1875	0.2117	0				Shapiro-Wilk test														Shapiro-Wilk test :
															90% Percentile	1.682	0.8203	0.5642	0.3054
																							W	0.959618													W	0.921924
															Mean	1	0.4619	0.361	0.1029				p-value	0.81679													p-value	0.519326
															Std. Deviation	0.4156	0.2085	0.1216	0.1253				alpha	0.05													alpha	0.05
															Std. Error	0.1697	0.08511	0.04964	0.05114
																							Test interpretation:														Test interpretation:
															Lower 95% CI of mean	0.5639	0.2432	0.2333	-0.02852				H0: The sample follows a Normal distribution.														H0: The sample follows a Normal distribution.
															Upper 95% CI of mean	1.436	0.6807	0.4886	0.2344				Ha: The sample does not follow a Normal distribution.														Ha: The sample does not follow a Normal distribution.
																							As the computed p-value is greater than the significance level alpha=0.05, one cannot reject the null hypothesis H0.														As the computed p-value is greater than the significance level alpha=0.05, one cannot reject the null hypothesis H0.
															KS normality test								The risk to reject the null hypothesis H0 while it is true is 81.68%.														The risk to reject the null hypothesis H0 while it is true is 51.93%.
															KS distance	0.2166	0.2385	0.1631	0.2944			MS-275														Liraglutide +MS-275
															P value	> 0.10	> 0.10	> 0.10	> 0.10				Summary statistics:														Summary statistics:
															Passed normality test (alpha=0.05)?	Yes	Yes	Yes	Yes
															P value summary	ns	ns	ns	ns				Variable	Observations	Obs. with missing data	Obs. without missing data	Minimum	Maximum	Mean	Std. deviation							Variable	Observations	Obs. with missing data	Obs. without missing data	Minimum	Maximum	Mean	Std. deviation
																							Var1	6	0	6	0.21168	0.564216	0.360955	0.1216							Var1	6	0	6	0	0.30543	0.102942	0.125272
															D'Agostino & Pearson omnibus normality test
															K2	N too small	N too small	N too small	N too small
															P value								Shapiro-Wilk test (Var1):														Shapiro-Wilk test (Var1):
															Passed normality test (alpha=0.05)?
															P value summary								W	0.966304													W	0.825927
																							p-value	0.866753													p-value	0.099245
															Shapiro-Wilk normality test								alpha	0.05													alpha	0.05
															W	N too small	N too small	N too small	N too small
															P value								Test interpretation:														Test interpretation:
															Passed normality test (alpha=0.05)?								H0: The sample follows a Normal distribution.														H0: The sample follows a Normal distribution.
															P value summary								Ha: The sample does not follow a Normal distribution.														Ha: The sample does not follow a Normal distribution.
																							As the computed p-value is greater than the significance level alpha=0.05, one cannot reject the null hypothesis H0.														As the computed p-value is greater than the significance level alpha=0.05, one cannot reject the null hypothesis H0.
															Sum	6	2.772	2.166	0.6177				The risk to reject the null hypothesis H0 while it is true is 86.68%.														The risk to reject the null hypothesis H0 while it is true is 9.92%.
																						Bartlett's test for equal variances
																						Bartlett's statistic (corrected)	9.767
																						P value	0.0207
																						P value summary	*
																						Do the variances differ signif. (P < 0.05)	Yes
																						ANOVA Table	SS	df	MS
																						Treatment (between columns)	2.562	3	0.8541
																						Residual (within columns)	1.233	20	0.06166
																						Total	3.796	23
																						Tukey's Multiple Comparison Test	Mean Diff.	q	Significant? P < 0.05?	Summary	95% CI of diff
																						Vehicle vs Liraglutide	0.5381	5.308	Yes	**	0.1368 to 0.9393
																						Vehicle vs MS-275	0.639	6.304	Yes	**	0.2378 to 1.040
																						Vehicle vs Liraglutide+MS-275	0.8971	8.849	Yes	***	0.4958 to 1.298
																						Liraglutide vs MS-275	0.101	0.9963	No	ns	-0.3002 to 0.5022
																						Liraglutide vs Liraglutide+MS-275	0.359	3.541	No	ns	-0.04223 to 0.7602
																						MS-275 vs Liraglutide+MS-275	0.258	2.545	No	ns	-0.1432 to 0.6593
															Fig 9A (iii) Retroperitoneal Fat
																						Fig 9A (iii) Shapiro -Wilk analysis : Retroperitoneal Fat
																Vehicle	Liraglutide	MS-275	Liraglutide+MS-275
															Number of values	6	6	6	6		Vehicle																Liraglutide
																						Summary statistics:																Summary statistics:
															Minimum	0.4485	0.5164	0.3167	0.0859
															25% Percentile	0.6583	0.7815	0.3209	0.09248			Variable	Observations	Obs. with missing data	Obs. without missing data	Minimum	Maximum	Mean	Std. deviation									Variable	Observations	Obs. with missing data	Obs. without missing data	Minimum	Maximum	Mean	Std. deviation
															Median	1.122	1.151	0.5448	0.3226			Var1	6	0	6	0.448464	1.2954	1	0.351596									Var1	6	0	6	0.516413	1.47235	1.07157	0.335102
															75% Percentile	1.287	1.319	0.7628	0.5202
															Maximum	1.295	1.472	0.8396	0.6657
																						Shapiro-Wilk test :																Shapiro-Wilk test :
															Mean	1	1.072	0.5509	0.3272
															Std. Deviation	0.3516	0.3351	0.224	0.2375			W	0.853168															W	0.947845
															Std. Error	0.1435	0.1368	0.09143	0.09696			p-value	0.166929															p-value	0.722801
																						alpha	0.05															alpha	0.05
															Lower 95% CI of mean	0.631	0.7199	0.3159	0.07794
															Upper 95% CI of mean	1.369	1.423	0.7859	0.5765			Test interpretation:																Test interpretation:
																						H0: The sample follows a Normal distribution.																H0: The sample follows a Normal distribution.
															KS normality test							Ha: The sample does not follow a Normal distribution.																Ha: The sample does not follow a Normal distribution.
															KS distance	0.277	0.2403	0.2025	0.2158			As the computed p-value is greater than the significance level alpha=0.05, one cannot reject the null hypothesis H0.																As the computed p-value is greater than the significance level alpha=0.05, one cannot reject the null hypothesis H0.
															P value	> 0.10	> 0.10	> 0.10	> 0.10			The risk to reject the null hypothesis H0 while it is true is 16.69%.																The risk to reject the null hypothesis H0 while it is true is 72.28%.
															Passed normality test (alpha=0.05)?	Yes	Yes	Yes	Yes		MS-275																Liraglutide +MS-275
															P value summary	ns	ns	ns	ns			Summary statistics:																Summary statistics:
															D'Agostino & Pearson omnibus normality test							Variable	Observations	Obs. with missing data	Obs. without missing data	Minimum	Maximum	Mean	Std. deviation									Variable	Observations	Obs. with missing data	Obs. without missing data	Minimum	Maximum	Mean	Std. deviation
															K2	N too small	N too small	N too small	N too small			Var1	6	0	6	0.316652	0.839551	0.550881	0.223958									Var1	6	0	6	0.0858954	0.665689	0.327199	0.237513
															P value
															Passed normality test (alpha=0.05)?
															P value summary							Shapiro-Wilk test:																Shapiro-Wilk test:
															Shapiro-Wilk normality test							W	0.890706															W	0.89247
															W	N too small	N too small	N too small	N too small			p-value	0.321903															p-value	0.331333
															P value							alpha	0.05															alpha	0.05
															Passed normality test (alpha=0.05)?
															P value summary							Test interpretation:																Test interpretation:
																						H0: The sample follows a Normal distribution.																H0: The sample follows a Normal distribution.
															Sum	6	6.429	3.305	1.963			Ha: The sample does not follow a Normal distribution.																Ha: The sample does not follow a Normal distribution.
																						As the computed p-value is greater than the significance level alpha=0.05, one cannot reject the null hypothesis H0.																As the computed p-value is greater than the significance level alpha=0.05, one cannot reject the null hypothesis H0.
																						The risk to reject the null hypothesis H0 while it is true is 32.19%.																The risk to reject the null hypothesis H0 while it is true is 33.13%.
																					Parameter
																					Table Analyzed	Data 1
																					One-way analysis of variance
																					P value	0.0006
																					P value summary	***
																					Are means signif. different? (P < 0.05)	Yes
																					Number of groups	4
																					F	8.962
																					R squared	0.5734
																					Bartlett's test for equal variances
																					Bartlett's statistic (corrected)	1.447
																					P value	0.6945
																					P value summary	ns
																					Do the variances differ signif. (P < 0.05)	No
																					ANOVA Table	SS	df	MS
																					Treatment (between columns)	2.302	3	0.7674
																					Residual (within columns)	1.712	20	0.08562
																					Total	4.015	23
																					Tukey's Multiple Comparison Test	Mean Diff.	q	Significant? P < 0.05?	Summary	95% CI of diff
																					Vehicle vs Liraglutide	-0.07157	0.5991	No	ns	-0.5444 to 0.4012
																					Vehicle vs MS-275	0.4491	3.76	No	ns	-0.02369 to 0.9219
																					Vehicle vs Liraglutide+MS-275	0.6728	5.632	Yes	**	0.2000 to 1.146
																					Liraglutide vs MS-275	0.5207	4.359	Yes	*	0.04787 to 0.9935
																					Liraglutide vs Liraglutide+MS-275	0.7444	6.231	Yes	**	0.2716 to 1.217
																					MS-275 vs Liraglutide+MS-275	0.2237	1.872	No	ns	-0.2491 to 0.6965

## Sheet: S D Fig 9 B-I
Figure 9 Source Data 1 : Source Data Fig 9B(i): Effect of MS275, or liraglutide monotherapy and combined therapy on relative mRNA expression of PPARα
PPARA	PPARA CT	Av PPARA CT	18srRNA CT	Av 18srRNA CT	Δ CT	Av Δ CT	ΔΔCT	2-ΔΔCT				Vehicle	Liraglutide	MS-275	MS-275+Liraglutide
NS1	29.3505	29.9625	10.2161	10.3937	19.5688	16.8464	2.72237	0.151526			Number of values	6	6	6	6
NS1	30.5745		10.5712																	mean	StDev	Fig 9B(i):Shapiro-Wilk analysis : PPAR alpha
NS2	26.7596	26.8142	10.3854	10.6757	16.1385		-0.707964	1.6335			Minimum	0.1515	0.4973	2.049	2.54			Vehicle	0.151526	1.25635	0.592133
NS2	26.8688		10.966								25% Percentile	0.9288	0.5069	2.431	2.585				1.6335
NS3	31.532	31.7805	15.3876	15.3569	16.4236		-0.422875	1.3406			Median	1.351	1.082	2.736	3.317				1.3406			Vehicle	Summary statistics:												Liraglutide
NS3	32.029		15.3263								75% Percentile	1.691	1.856	4.532	4.607				1.86236																	Summary statistics:
NS4	34.589	34.7374	18.6795	18.788	15.9493		-0.897129	1.86236			Maximum	1.862	2.663	8.066	5.151				1.36221				Variable	Observations	Obs. with missing data	Obs. without missing data	Minimum	Maximum	Mean	Std. deviation
NS4	34.8857		18.8966																1.18793				Var1	6	0	6	0.151526	1.86236	1.25635	0.592133						Variable	Observations	Obs. with missing data	Obs. without missing data	Minimum	Maximum	Mean	Std. deviation
NS5	26.823	26.8525	10.493	10.452	16.4005		-0.445949	1.36221			10% Percentile	0.1515	0.4973	2.049	2.54																					Var1	6	0	6	0.497303	2.66283	1.23698	0.86209
NS5	26.882		10.411								90% Percentile	1.862	2.663	8.066	5.151			Liraglutide	1.58716	1.23698	0.86209
NS6	26.45	26.556	9.953	9.958	16.598		-0.248449	1.18793											0.497303				Shapiro-Wilk test
NS6	26.662		9.963								Mean	1.256	1.237	3.583	3.558				0.614794																	Shapiro-Wilk test :
L1	25.986	25.659	9.445	9.479	16.18		-0.666449	1.58716			Std. Deviation	0.5921	0.8621	2.236	1.114				0.510133				W	0.858777
L1	25.332		9.513								Std. Error	0.2417	0.3519	0.9127	0.4547				1.54966				p-value	0.185009												W	0.84997
L2	33.7449	33.1988	15.3242	15.3446	17.8543		1.0078	0.497303											2.66283				alpha	0.05												p-value	0.157319
L2	32.6527		15.3649								Lower 95% CI of mean	0.6349	0.3323	1.237	2.39																					alpha	0.05
L3	32.8864	32.6151	15.0756	15.0668	17.5483		0.701825	0.614794			Upper 95% CI of mean	1.878	2.142	5.929	4.727			MS-275	3.35364	3.58302	2.23554		Test interpretation:
L3	32.3438		15.058																2.76532				H0: The sample follows a Normal distribution.													Test interpretation:
L4	29.0107	28.9846	11.0853	11.1671	17.8175		0.971054	0.510133			KS normality test								8.0657				Ha: The sample does not follow a Normal distribution.													H0: The sample follows a Normal distribution.
L4	28.9585		11.2489								KS distance	0.2873	0.2647	0.3742	0.2879				2.04877				As the computed p-value is greater than the significance level alpha=0.05, one cannot reject the null hypothesis H0.													Ha: The sample does not follow a Normal distribution.
L5	26.238	26.209	10.018	9.9945	16.2145		-0.631949	1.54966			P value	> 0.10	> 0.10	0.0087	> 0.10				2.55805				The risk to reject the null hypothesis H0 while it is true is 18.50%.													As the computed p-value is greater than the significance level alpha=0.05, one cannot reject the null hypothesis H0.
L5	26.18		9.971								Passed normality test (alpha=0.05)?	Yes	Yes	No	Yes				2.70661																	The risk to reject the null hypothesis H0 while it is true is 15.73%.
L6	25.4122	25.3631	9.9783	9.92964	15.4335		-1.41296	2.66283			P value summary	ns	ns	**	ns							MS-275
L6	25.314		9.88098															Lira +MS-275	5.15101	3.55849	1.1137		Summary statistics:															Lira +MS-275	Summary statistics:
MS-1	32.6918	32.0152	17.0551	16.9145	15.1007		-1.74573	3.35364			D'Agostino & Pearson omnibus normality test								4.42583
MS-1	31.3387		16.7739								K2	N too small	N too small	N too small	N too small				3.96535				Variable	Observations	Obs. with missing data	Obs. without missing data	Minimum	Maximum	Mean	Std. deviation									Variable	Observations	Obs. with missing data	Obs. without missing data	Minimum	Maximum	Mean	Std. deviation
MS-2	26.11	26.07	10.697	10.691	15.379		-1.46745	2.76532			P value								2.54				Var1	6	0	6	2.04877	8.0657	3.58302	2.23554									Var1	6	0	6	2.54	5.15101	3.55849	1.1137
MS-2	26.03		10.685								Passed normality test (alpha=0.05)?								2.66824
MS-3	30.256	30.427	16.6767	16.5924	13.8346		-3.0118	8.0657			P value summary								2.60048
MS-3	30.598		16.508																				Shapiro-Wilk test																Shapiro-Wilk test (Var1):
MS-4	26.209	25.7945	9.92898	9.98284	15.8117		-1.03476	2.04877			Shapiro-Wilk normality test
MS-4	25.38		10.0367								W	N too small	N too small	N too small	N too small								W	0.671807															W	0.857224
MS-5	25.8416	25.7348	10.2949	10.2434	15.4914		-1.35504	2.55805			P value												p-value	0.00307654															p-value	0.179843
MS-5	25.628		10.1919								Passed normality test (alpha=0.05)?												alpha	0.05															alpha	0.05
MS-6	25.988	25.7315	9.91095	10.3216	15.41		-1.43649	2.70661			P value summary
MS-6	25.4751		10.7322																				Test interpretation:																Test interpretation:
LMS-1	30.1978	30.2408	15.9764	15.7592	14.4816		-2.36486	5.15101			Sum	7.538	7.422	21.5	21.35								H0: The sample follows a Normal distribution.																H0: The sample follows a Normal distribution.
LMS-1	30.2837		15.542																				Ha: The sample does not follow a Normal distribution.																Ha: The sample does not follow a Normal distribution.
LMS-2	23.963	24.016	9.38	9.3155	14.7005		-2.14595	4.42583															As the computed p-value is lower than the significance level alpha=0.05, one should reject the null hypothesis H0, and accept the alternative hypothesis Ha.																As the computed p-value is greater than the significance level alpha=0.05, one cannot reject the null hypothesis H0.
LMS-2	24.069		9.251																				The risk to reject the null hypothesis H0 while it is true is lower than 0.31%.																The risk to reject the null hypothesis H0 while it is true is 17.98%.
LMS-3	24.808	24.7585	9.924	9.8995	14.859		-1.98745	3.96535
LMS-3	24.709		9.875
LMS-4	31.4226	31.2634	15.9921	15.7618	15.5016		-1.34483	2.54
LMS-4	31.1041		15.5314
LMS-5	25.2355	25.5723	10.1167	10.1417	15.4306		-1.41589	2.66824
LMS-5	25.9091		10.1668
LMS-6	28.4706	29.231	13.6445	13.7633	15.4677		-1.37878	2.60048
LMS-6	29.9914		13.8822

## Sheet: S D Fig 9 B-II
Figure 9 Source Data 1 : Source Data Fig 9B(ii): Effect of MS275, or liraglutide monotherapy and combined therapy on relative mRNA expression of CIDEA
												Vehicle	Liraglutide	MS-275	Liraglutide+MS-275				Shapiro -Wilk analysis																														Parameter
CIDEA	CIDEA CT	Av CIDEA CT	18srRNA CT	Av 18srRNA CT	Δ CT	Av Δ CT	ΔΔCT	2-ΔΔCT			Number of values	6	6	6	6																																		Table Analyzed
NS1	26.6323	26.5886	9.0915	8.96816	17.6205	17.3391	0.281376	0.822806										Vehicle														Liraglutide
NS1	26.545		8.84481								Minimum	0.3109	9.757	10.67	5.649				Summary statistics:														Summary statistics:																One-way analysis of variance
NS2	30.5309	30.7885	13.3881	13.3496	17.4389		0.0997925	0.933167			25% Percentile	0.6948	15.18	13.29	9.268																																		P value
NS2	31.046		13.3112								Median	0.9286	38.86	38.96	31.94				Variable	Observations	Obs. with missing data	Obs. without missing data	Minimum	Maximum	Mean	Std. deviation							Variable	Observations	Obs. with missing data	Obs. without missing data	Minimum	Maximum	Mean	Std. deviation									P value summary
NS3	31.7109	31.7896	14.2796	14.3366	17.4531		0.114007	0.924018			75% Percentile	1.965	44.55	50.87	60.83				Var1	6	0	6	0.310938	2.57232	1.22091	0.809546							Var1	6	0	6	9.75657	46.0142	32.4245	15.2145									Are means signif. different? (P < 0.05)
NS3	31.8684		14.3935								Maximum	2.572	46.01	53.18	61.31																																		Number of groups
NS4	25.3711	25.584	9.60347	9.608	15.976		-1.36307	2.57232																																									F
NS4	25.7969		9.61252								Mean	1.221	32.42	34.34	33.67				Shapiro-Wilk test														Shapiro-Wilk test																R squared
NS5	28.7241	28.7241	12.2001	12.2025	16.5217		-0.817406	1.76223			Std. Deviation	0.8095	15.21	19.3	26.96
NS5	28.7241		12.2048								Std. Error	0.3305	6.211	7.878	11.01				W	0.901274													W	0.835591															Bartlett's test for equal variances
NS6	26.983	27.274	8.2338	8.2496	19.0244		1.6853	0.310938											p-value	0.381518													p-value	0.119798															Bartlett's statistic (corrected)
NS6	27.5649		8.26541								Lower 95% CI of mean	0.3713	16.46	14.09	5.376				alpha	0.05													alpha	0.05															P value
L1	26.1774	26.2626	14.3543	14.385	11.8776		-5.46151	44.0635			Upper 95% CI of mean	2.07	48.39	54.59	61.96																																		P value summary
L1	26.3479		14.4158																Test interpretation:														Test interpretation:																Do the variances differ signif. (P < 0.05)
L2	28.3476	28.4606	14.4784	14.4079	14.0527		-3.28637	9.75657			KS normality test								H0: The sample follows a Normal distribution.														H0: The sample follows a Normal distribution.
L2	28.5737		14.3375								KS distance	0.3055	0.3051	0.293	0.2913				Ha: The sample does not follow a Normal distribution.														Ha: The sample does not follow a Normal distribution.																ANOVA Table
L3	22.4972	22.1258	9.96198	10.0276	12.0982		-5.24084	37.8138			P value	0.0838	0.0849	> 0.10	> 0.10				As the computed p-value is greater than the significance level alpha=0.05, one cannot reject the null hypothesis H0.														As the computed p-value is greater than the significance level alpha=0.05, one cannot reject the null hypothesis H0.																Treatment (between columns)
L3	21.7545		10.0932								Passed normality test (alpha=0.05)?	Yes	Yes	Yes	Yes				The risk to reject the null hypothesis H0 while it is true is 38.15%.														The risk to reject the null hypothesis H0 while it is true is 11.98%.																Residual (within columns)
L4	27.2117	27.271	14.084	14.0183	13.2527		-4.08637	16.9871			P value summary	ns	ns	ns	ns			MS-275	Summary statistics:													Liraglutide +MS-275																	Total
L4	27.3303		13.9526																														Summary statistics:
L5	26.3555	26.3891	14.4573	14.3688	12.0203		-5.31875	39.9119			D'Agostino & Pearson omnibus normality test								Variable	Observations	Obs. with missing data	Obs. without missing data	Minimum	Maximum	Mean	Std. deviation																							Tukey's Multiple Comparison Test
L5	26.4228		14.2803								K2	N too small	N too small	N too small	N too small				Var1	6	0	6	10.6715	53.1824	34.3399	19.2968							Variable	Observations	Obs. with missing data	Obs. without missing data	Minimum	Maximum	Mean	Std. deviation									Vehicle vs Liraglutide
L6	24.1774	24.3008	12.5743	12.4857	11.8151		-5.52401	46.0142			P value																						Var1	6	0	6	5.64895	61.3148	33.667	26.9586									Vehicle vs MS-275
L6	24.4242		12.3971								Passed normality test (alpha=0.05)?																																						Vehicle vs Liraglutide+MS-275
MS-1	23.7885	23.959	12.3094	12.3528	11.6062		-5.73288	53.1824			P value summary								Shapiro-Wilk test (Var1):																														Liraglutide vs MS-275
MS-1	24.1295		12.3961																														Shapiro-Wilk test (Var1):																Liraglutide vs Liraglutide+MS-275
MS-2	30.758	31.2613	19.5146	19.5691	11.6922		-5.6469	50.1058			Shapiro-Wilk normality test								W	0.833311																													MS-275 vs Liraglutide+MS-275
MS-2	31.7646		19.6236								W	N too small	N too small	N too small	N too small				p-value	0.114636													W	0.785841
MS-3	34.6854	34.6032	21.1541	21.0888	13.5144		-3.82467	14.169			P value								alpha	0.05													p-value	0.0436672
MS-3	34.521		21.0235								Passed normality test (alpha=0.05)?																						alpha	0.05
MS-4	25.2422	25.5519	12.5967	13.0102	12.5417		-4.79738	27.807			P value summary								Test interpretation:
MS-4	25.8617		13.4238																H0: The sample follows a Normal distribution.														Test interpretation:
MS-5	25.0974	24.6534	12.7809	12.9611	11.6922		-5.64684	50.1036			Sum	7.325	194.5	206	202				Ha: The sample does not follow a Normal distribution.														H0: The sample follows a Normal distribution.
MS-5	24.2093		13.1414																As the computed p-value is greater than the significance level alpha=0.05, one cannot reject the null hypothesis H0.														Ha: The sample does not follow a Normal distribution.
MS-6	33.9492	34.2142	20.5182	20.2909	13.9234		-3.41569	10.6715											The risk to reject the null hypothesis H0 while it is true is 11.46%.														As the computed p-value is lower than the significance level alpha=0.05, one should reject the null hypothesis H0, and accept the alternative hypothesis Ha.
MS-6	34.4793		20.0635																														The risk to reject the null hypothesis H0 while it is true is lower than 4.37%.
LMS-1	22.8607	22.9219	11.1208	11.2856	11.6363		-5.70277	52.0839
LMS-1	22.9831		11.4504
LMS-2	24.9482	24.9482	13.6161	13.5321	11.4161		-5.92302	60.6744
LMS-2	24.9482		13.4481
LMS-3	30.4396	30.3114	16.5091	16.3612	13.9502		-3.38883	10.4747
LMS-3	30.1833		16.2133
LMS-4	24.4656	24.7927	10.9764	11.0149	13.7778		-3.56131	11.8049
LMS-4	25.1198		11.0535
LMS-5	24.7087	24.7782	13.3667	13.3773	11.4009		-5.93816	61.3148
LMS-5	24.8478		13.3879
LMS-6	28.92	29.0108	14.1009	14.1697	14.8411		-2.49798	5.64895
LMS-6	29.1017		14.2386
[truncated: 5 more columns]

## Sheet: S D Fig 9 B-III
Figure 9 Source Data 1 : Source Data Fig 9B(iii): Effect of MS275, or liraglutide monotherapy and combined therapy on relative mRNA expression of PGC1 alpha																																																	Parameter
																																																	Table Analyzed
PGC1a	Pgc1aCT	Av PGC1a CT	18srRNA CT	Av 18srRNA CT	Δ CT	Av Δ CT	ΔΔCT	2-ΔΔCT				Vehicle	Liraglutide	MS-275	Liraglutide+MS-275			Fig 9B (iii) Shapiro-Wilk analysis: PGC1a																															One-way analysis of variance
NS1	30.3419	30.8439	10.2161	10.3937	20.4502	18.4699	1.98032	0.253433			Number of values	6	6	6	6																																		P value
NS1	31.3458		10.5712																																														P value summary
NS2	28.6011	28.4269	10.3854	10.6757	17.7512		-0.718674	1.64567			Minimum	0.2534	0.4698	2.175	4.036			Vehicle	Summary statistics:												Liraglutide	Summary statistics:																	Are means signif. different? (P < 0.05)
NS2	28.2527		10.966								25% Percentile	0.8792	1.145	2.209	4.202																																		Number of groups
NS3	33.6526	33.5543	15.3876	15.3569	18.1974		-0.27249	1.20789			Median	1.161	2.372	2.938	5.032				Variable	Observations	Obs. with missing data	Obs. without missing data	Minimum	Maximum	Mean	Std. deviation						Variable	Observations	Obs. with missing data	Obs. without missing data	Minimum	Maximum	Mean	Std. deviation										F
NS3	33.456		15.3263								75% Percentile	1.639	4.02	5.465	11.12				Var1	6	0	6	0.253433	1.64567	1.15775	0.508849						Var1	6	0	6	0.469753	4.5846	2.49986	1.56171										R squared
NS4	36.859	36.547	18.6795	18.788	17.759		-0.710918	1.63685			Maximum	1.646	4.585	6.213	15.51
NS4	36.235		18.8966																																														Bartlett's test for equal variances
NS5	28.886	28.8005	10.493	10.452	18.3485		-0.12137	1.08777			Mean	1.158	2.5	3.617	7.255				Shapiro-Wilk test :													Shapiro-Wilk test :																	Bartlett's statistic (corrected)
NS5	28.715		10.411								Std. Deviation	0.5088	1.562	1.692	4.547																																		P value
NS6	28.073	28.271	9.953	9.958	18.313		-0.15687	1.11487			Std. Error	0.2077	0.6376	0.6906	1.856				W	0.863816												W	0.968622																P value summary
NS6	28.469		9.963																p-value	0.202647												p-value	0.883051																Do the variances differ signif. (P < 0.05)
L1	26.082	26.011	9.445	9.479	16.532		-1.93787	3.8314			Lower 95% CI of mean	0.6237	0.8609	1.842	2.483				alpha	0.05												alpha	0.05
L1	25.94		9.513								Upper 95% CI of mean	1.692	4.139	5.392	12.03																																		ANOVA Table
L2	33.9348	33.36	15.3242	15.3446	18.0154		-0.454443	1.37025											Test interpretation:													Test interpretation:																	Treatment (between columns)
L2	32.7852		15.3649								KS normality test								H0: The sample follows a Normal distribution.													H0: The sample follows a Normal distribution.																	Residual (within columns)
L3	31.5329	31.9811	15.0756	15.0668	16.9143		-1.55561	2.93959			KS distance	0.2786	0.1721	0.2841	0.3294				Ha: The sample does not follow a Normal distribution.													Ha: The sample does not follow a Normal distribution.																	Total
L3	32.4293		15.058								P value	> 0.10	> 0.10	> 0.10	0.0408				As the computed p-value is greater than the significance level alpha=0.05, one cannot reject the null hypothesis H0.													As the computed p-value is greater than the significance level alpha=0.05, one cannot reject the null hypothesis H0.
L4	30.6101	30.727	11.0853	11.1671	19.5599		1.09002	0.469753			Passed normality test (alpha=0.05)?	Yes	Yes	Yes	No				The risk to reject the null hypothesis H0 while it is true is 20.26%.													The risk to reject the null hypothesis H0 while it is true is 88.31%.																	Tukey's Multiple Comparison Test
L4	30.8438		11.2489								P value summary	ns	ns	ns	*																																		Vehicle vs Liraglutide
L5	27.536	27.6135	10.018	9.9945	17.619		-0.85087	1.80359										MS-275	Summary statistics:												Liraglutide + MS-275	Summary statistics:																	Vehicle vs MS-275
L5	27.691		9.971								D'Agostino & Pearson omnibus normality test																																						Vehicle vs Liraglutide+MS-275
L6	26.3044	26.2027	9.9783	9.92964	16.2731		-2.1968	4.5846			K2	N too small	N too small	N too small	N too small				Variable	Observations	Obs. with missing data	Obs. without missing data	Minimum	Maximum	Mean	Std. deviation						Variable	Observations	Obs. with missing data	Obs. without missing data	Minimum	Maximum	Mean	Std. deviation										Liraglutide vs MS-275
L6	26.101		9.88098								P value								Var1	6	0	6	2.17457	6.2127	3.61669	1.69154						Var1	6	0	6	4.03609	15.5126	7.25471	4.54735										Liraglutide vs Liraglutide+MS-275
MS-1	33.569	33.917	17.0551	16.9145	17.0025		-1.46733	2.7651			Passed normality test (alpha=0.05)?																																						MS-275 vs Liraglutide+MS-275
MS-1	34.2651		16.7739								P value summary
MS-2	27.927	28.01	10.697	10.691	17.319		-1.15087	2.22048											Shapiro-Wilk test (Var1):													Shapiro-Wilk test (Var1):
MS-2	28.093		10.685								Shapiro-Wilk normality test
MS-3	32.256	32.427	16.6767	16.5924	15.8346		-2.63522	6.2127			W	N too small	N too small	N too small	N too small				W	0.840584												W	0.774826
MS-3	32.598		16.508								P value								p-value	0.131824												p-value	0.0344773
MS-4	27.5626	26.8151	9.92898	9.98284	16.8323		-1.63756	3.11139			Passed normality test (alpha=0.05)?								alpha	0.05												alpha	0.05
MS-4	26.0676		10.0367								P value summary
MS-5	24.7934	26.3304	10.2949	10.2434	16.0869		-2.38292	5.21592											Test interpretation:													Test interpretation:
MS-5	27.8673		10.1919								Sum	6.946	15	21.7	43.53				H0: The sample follows a Normal distribution.													H0: The sample follows a Normal distribution.
MS-6	27.5972	27.6707	9.91095	10.3216	17.3491		-1.12073	2.17457											Ha: The sample does not follow a Normal distribution.													Ha: The sample does not follow a Normal distribution.
MS-6	27.7442		10.7322																As the computed p-value is greater than the significance level alpha=0.05, one cannot reject the null hypothesis H0.													As the computed p-value is lower than the significance level alpha=0.05, one should reject the null hypothesis H0, and accept the alternative hypothesis Ha.
LMS-1	31.0984	30.9573	15.9764	15.7592	15.1981		-3.27179	9.65844											The risk to reject the null hypothesis H0 while it is true is 13.18%.													The risk to reject the null hypothesis H0 while it is true is lower than 3.45%.
LMS-1	30.8161		15.542
LMS-2	25.9471	25.6953	9.38	9.3155	16.3798		-2.09007	4.2577
LMS-2	25.4435		9.251
LMS-3	26.0683	26.3564	9.924	9.8995	16.4569		-2.01296	4.03609
LMS-3	26.6446		9.875
LMS-4	30.1601	30.2763	15.9921	15.7618	14.5145		-3.95537	15.5126
LMS-4	30.3924		15.5314
LMS-5	26.3578	26.3734	10.1167	10.1417	16.2317		-2.23821	4.71812
LMS-5	26.389		10.1668
LMS-6	29.9241	29.8149	13.6445	13.7633	16.0516		-2.41828	5.34533
LMS-6	29.7058		13.8822
[truncated: 5 more columns]

## Sheet: S D Fig 9 B-IV
Figure 9 Source Data 1 : Source Data Fig 9B(iv): Effect of MS275, or liraglutide monotherapy and combined therapy on relative mRNA expression of UCP1

												Vehicle	Liraglutide	MS-275	MS-275+Liraglutide		Fig 9B (iv) Shapiro-Wilk analysis: UCP1
											Number of values	6	6	6	6
UCP1	UCP1 CT	Av UCP1 CT	18srRNA CT	Av 18srRNA CT	Δ CT	Av Δ CT	ΔΔCT	2-ΔΔCT									Vehicle	Summary statistics:											MS-275	Summary statistics:
NS1	32.1225	31.7258	10.5695	10.5878	21.138	18.9458	2.1922	0.218818			Minimum	0.2188	10.92	17.08	38.95
NS1	31.3291		10.6062								25% Percentile	0.561	11.7	20.42	58.18			Variable	Observations	Obs. with missing data	Obs. without missing data	Minimum	Maximum	Mean	Std. deviation					Variable	Observations	Obs. with missing data	Obs. without missing data	Minimum	Maximum	Mean	Std. deviation
NS2	34.1465	34.6726	15.7136	15.6819	18.9907		0.0448705	0.969377			Median	1.152	37.63	88.53	195.1			Var1	6	0	6	0.218818	3.12191	1.33266	1.01238					Var1	6	0	6	17.0835	143.105	83.3226	59.883
NS2	35.1987		15.6503								75% Percentile	2.038	161.5	141.6	310.6
NS3	36.5	36.9816	17.3364	17.4689	19.5127		0.566931	0.675051			Maximum	3.122	300.6	143.1	314.8
NS3	37.4633		17.6014															Shapiro-Wilk test												Shapiro-Wilk test (Var1):
NS4	28.3256	28.2791	10.8461	10.9758	17.3034		-1.64243	3.12191			Mean	1.333	85.66	83.32	186.3
NS4	28.2327		11.1054								Std. Deviation	1.012	112.9	59.88	132.5			W	0.927281											W	0.818659
NS5	30.534	30.6425	12.203	12.113	18.5295		-0.416285	1.33449			Std. Error	0.4133	46.09	24.45	54.11			p-value	0.559276											p-value	0.0859223
NS5	30.751		12.023															alpha	0.05											alpha	0.05
NS6	30.394	31.0145	12.755	12.814	18.2005		-0.745285	1.67631			Lower 95% CI of mean	0.2702	-32.82	20.48	47.2
NS6	31.635		12.873								Upper 95% CI of mean	2.395	204.1	146.2	325.4			Test interpretation:												Test interpretation:
L1	27.7908	27.8905	17.103	17.1765	10.714		-8.23178	300.617										H0: The sample follows a Normal distribution.												H0: The sample follows a Normal distribution.
L1	27.9902		17.25								KS normality test							Ha: The sample does not follow a Normal distribution.												Ha: The sample does not follow a Normal distribution.
L2	29.9694	29.773	14.4784	14.4079	15.3651		-3.58069	11.9645			KS distance	0.2005	0.2558	0.26	0.2917			As the computed p-value is greater than the significance level alpha=0.05, one cannot reject the null hypothesis H0.												As the computed p-value is greater than the significance level alpha=0.05, one cannot reject the null hypothesis H0.
L2	29.5766		14.3375								P value	> 0.10	> 0.10	> 0.10	> 0.10		Liraglutide	Summary statistics:
L3	22.4972	22.1258	9.96198	10.0276	12.0982		-6.84755	115.164			Passed normality test (alpha=0.05)?	Yes	Yes	Yes	Yes																		Liraglutide +MS-275
L3	21.7545		10.0932								P value summary	ns	ns	ns	ns			Variable	Observations	Obs. with missing data	Obs. without missing data	Minimum	Maximum	Mean	Std. deviation									Summary statistics:
L4	26.591	26.9694	11.9102	11.9346	15.0349		-3.9109	15.0417										Var1	6	0	6	10.9229	300.617	85.6563	112.896
L4	27.3479		11.9589								D'Agostino & Pearson omnibus normality test																							Variable	Observations	Obs. with missing data	Obs. without missing data	Minimum	Maximum	Mean	Std. deviation
L5	33.329	33.0625	17.551	17.566	15.4965		-3.44928	10.9229			K2	N too small	N too small	N too small	N too small																			Var1	6	0	6	38.9466	314.821	186.301	132.549
L5	32.796		17.581								P value							Shapiro-Wilk test :
L6	23.8766	24.6271	11.5121	11.5937	13.0334		-5.91235	60.2275			Passed normality test (alpha=0.05)?
L6	25.3776		11.6754								P value summary							W	0.754124															Shapiro-Wilk test
MS-1	24.5253	24.1376	12.3094	12.3528	11.7849		-7.16093	143.105										p-value	0.0218538
MS-1	23.7499		12.3961								Shapiro-Wilk normality test							alpha	0.05															W	0.790317
MS-2	33.2883	33.0803	18.645	18.5628	14.5176		-4.42823	21.5294			W	N too small	N too small	N too small	N too small																			p-value	0.0480065
MS-2	32.8724		18.4806								P value							Test interpretation:																alpha	0.05
MS-3	26.0788	25.9508	12.7237	12.6899	13.2609		-5.68491	51.4433			Passed normality test (alpha=0.05)?							H0: The sample follows a Normal distribution.
MS-3	25.8228		12.6561								P value summary							Ha: The sample does not follow a Normal distribution.																Test interpretation:
MS-4	26.4057	26.3597	14.7066	14.5551	11.8046		-7.14114	141.155										As the computed p-value is lower than the significance level alpha=0.05, one should reject the null hypothesis H0, and accept the alternative hypothesis Ha.																H0: The sample follows a Normal distribution.
MS-4	26.3138		14.4035								Sum	7.996	513.9	499.9	1118			The risk to reject the null hypothesis H0 while it is true is lower than 2.19%.																Ha: The sample does not follow a Normal distribution.
MS-5	29.3255	29.3279	14.5088	14.4766	14.8513		-4.09453	17.0835																										As the computed p-value is lower than the significance level alpha=0.05, one should reject the null hypothesis H0, and accept the alternative hypothesis Ha.
MS-5	29.3302		14.4444																															The risk to reject the null hypothesis H0 while it is true is lower than 4.80%.
MS-6	26.2453	26.0875	14.1467	14.1146	11.9729		-6.97293	125.62
MS-6	25.9297		14.0825
LMS-1	21.7161	21.959	11.1208	11.2856	10.6735		-8.27233	309.186
LMS-1	22.202		11.4504
LMS-2	30.205	30.2455	17.32	17.313	12.9325		-6.01328	64.5921
LMS-2	30.286		17.306
LMS-3	25.7031	25.8888	13.6161	13.5321	12.3567		-6.58907	96.2738
LMS-3	26.0746		13.4481
LMS-4	23.7927	24.6773	10.9764	11.0149	13.6624		-5.28343	38.9466
LMS-4	25.5619		11.0535
LMS-5	24.0066	24.0247	13.3667	13.3773	10.6474		-8.29839	314.821
LMS-5	24.0429		13.3879
LMS-6	24.8241	24.9159	14.1009	14.1697	10.7462		-8.19962	293.989
LMS-6	25.0077		14.2386
[truncated: 6 more columns]
